# Supplementary material
Source: PubMed Central journal article supplement (PMC4232457)
Supplement: NIHMS605432-supplement-Supp_Table_S1-S17.pdf [file NIHMS605432-supplement-Supp_Table_S1-S17.pdf]

Table S1. Primer sequences and PCR product sizes for gene expression validation by qPCR.

| Gene name      | Forward primer/reverse primer (PCR product size in bp)                |
|----------------|-----------------------------------------------------------------------|
| <i>ACTA2</i>   | 5'- CTATGAGGGCTATGCCTTGCC -3'/5'- GCTCAGCAGTAGTAACGAAGGA -3' (122)    |
| <i>ALDH1A1</i> | 5'- CTGCTGGCGACAATGGAGT -3'/5'- CGCAATGTTTTGATGCAGCCT -3' (89)        |
| <i>ARHGAP5</i> | 5'- CCTTGCCCAAGAACTAGCAAA -3'/5'- GGCAGTCCATAACTGACTCAAAA -3' (139)   |
| <i>AXL</i>     | 5'- ATCAGCTTCGGCTAGGCAG -3'/5'- TCCGCGTAGCACTAATGTTCT -3' (159)       |
| <i>BDKRB1</i>  | 5'- ACTGAACGTGGCAGAAATCTAC -3'/5'- GCTCCGAAAGGCCAGTTAAAC -3' (117)    |
| <i>CCND3</i>   | 5'- TACCCGCCATCCATGATCG -3'/5'- AGGCAGTCCACTTCAGTGC -3' (128)         |
| <i>CD44</i>    | 5'- CTGCCGCTTTGCAGGTGTA -3'/5'- CATTGTGGGCAAGGTGCTATT -3' (109)       |
| <i>CEACAM5</i> | 5'- AAGAAATGACGCAAGAGCCTATG -3'/5'- CCCGAAAGGTAAGACGAGTCTG -3' (138)  |
| <i>CEACAM6</i> | 5'- TCAATGGGACGTTCCAGCAAT -3'/5'- CACTCCAATCGTGATGCCGA -3' (194)      |
| <i>CYR61</i>   | 5'- GGTCAAAGTTACCGGGCAGT -3'/5'- GGAGGCATCGAATCCCAGC -3' (115)        |
| <i>DKK1</i>    | 5'- ATAGCACCTTGGATGGGTATTCC -3'/5'- CTGATGACCGGAGACAAACAG -3' (96)    |
| <i>EEF1B2</i>  | 5'- GGAAGAACGTCTTGCACAAT -3'/5'- CGCACTCCTCTAATTTTCGCCA -3' (129)     |
| <i>ETV6</i>    | 5'- ATCAACCTCTCTCATCGGGAA -3'/5'- CAGTCTGCTATTCTCCCAATGG -3' (104)    |
| <i>FSIP1</i>   | 5'- AAAGGCTGGTTGAGCTTTTGA -3'/5'- CATCACGGTCAGGTTTCTGATTA -3' (237)   |
| <i>GAPDH</i>   | 5'- GGTGGTCTCCTCTGACTTCAACA -3'/5'- GTTGCTGTAGCCAAATTCGTTGT -3' (126) |
| <i>GAS6</i>    | 5'- CTCGTGCAGCCTATAAACCCCT -3'/5'- TCCTCGTGTTCACTTTCACCG -3' (106)    |
| <i>GJA1</i>    | 5'- TGGTAAGGTGAAAATGCGAGG -3'/5'- GCACTCAAGCTGAATCCATAGAT -3' (123)   |
| <i>IGFBP3</i>  | 5'- AGACACACTGAATCACCTGAAGT -3'/5'- AGGGCGACACTGCTTTTTTCTT -3' (106)  |
| <i>LBH</i>     | 5'- GCCCCGACTATCTGAGATCG -3'/5'- GCGGTCAAATCTGACGGGT -3' (134)        |
| <i>LTBP1</i>   | 5'- GCTTCCGTCCAGATACATCAG -3'/5'- CTTGGTACGAGACTTGGGATTG -3' (97)     |
| <i>MDM2</i>    | 5'- GGCAGGGGAGAGTGATACAGA -3'/5'- GAAGCCAATTCTCACGAAGGG -3' (146)     |
| <i>MFAP5</i>   | 5'- AGTCGGAAGTAATTGGAGCGA -3'/5'- TAACCAAGAGGAATGCGGTCA -3' (84)      |
| <i>NDUFS1</i>  | 5'- TGCCCTGTAGGTGCCCTAA -3'/5'- CCAACCGCATCCATTACATCAAT -3' (98)      |
| <i>PAICS</i>   | 5'- GCAGGGTTGTAGTGTGATGG -3'/5'- GCCACTGCCACAAATACAGTAG -3' (190)     |
| <i>PLEC</i>    | 5'- CTCCGCAGCGAGTTTGGAGAG -3'/5'- CTGCACGTCGTTGAAGAGCA -3' (222)      |
| <i>SI00A8</i>  | 5'- ATGCCGTCTACAGGGATGAC -3'/5'- ACTGAGGACACTCGGTCTCTA -3' (54)       |
| <i>SEMA3C</i>  | 5'- TAACCAAGAGGAATGCGGTCA -3'/5'- TGCTCCTGTTATTGTCAGTCAGT -3' (159)   |
| <i>SHC1</i>    | 5'- GCCAAAGACCCTGTGAATCAG -3'/5'- GTATTGTTTGAAGCGCAACTCG -3' (114)    |
| <i>SLC40A1</i> | 5'- CCACAATACGAAGGATTGACCA -3'/5'- ACTGGGGAGCCAAATGTCATA -3' (82)     |
| <i>TACSTD2</i> | 5'- CATCAAGGGCGAGTCTCTATTC -3'/5'- CCCGACTTTCTCCGGTTGG -3' (225)      |
| <i>TSPAN8</i>  | 5'- CGCCACAGGGGAAAGTGAAA -3'/5'- CAGCTCCATTGACCAAACCG -3' (89)        |
| <i>VGF</i>     | 5'- CCTTCCCGAAACCCACAAGTT -3'/5'- GCCTTGGTACGCCTTGGAC -3' (94)        |
| <i>WIF1</i>    | 5'- GCCCACAACCCTGTCGAAAT -3'/5'- CTCCTGGTAACCTTTGGAAC -3' (75)        |

Table S2. Validation by qPCR of differentially expressed genes identified by RNA-Seq analysis between KLF5-expressing DU 145 xenograft tumors and the PLHCX vector control or between K369R-expressing tumors and PLHCX.

| Gene name                            | Fold change |                                |
|--------------------------------------|-------------|--------------------------------|
|                                      | qPCR        | RNA-Seq ( <i>p</i> value, FDR) |
| <b><i>KLF5</i> vs <i>PLHCX</i></b>   |             |                                |
| <i>KLF5</i>                          | 9.49        | 12.89(<0.01, <0.05)            |
| <i>EEF1B2</i> <sup>a</sup>           | 1.12        | -∞(<0.01, <0.05)               |
| <i>NDUFS1</i> <sup>a</sup>           | 1.55        | -∞(<0.01, <0.05)               |
| <i>PAICS</i> <sup>a</sup>            | 1.16        | -∞(<0.01, <0.05)               |
| <i>FSIP1</i> <sup>a</sup>            | -1.02       | -29.69(<0.01, <0.05)           |
| <i>PLEC</i> <sup>a</sup>             | 1.23        | ∞(<0.01, <0.05)                |
| <i>MDM2</i> <sup>b</sup>             | 1.28        | 1.52(0.02, 1)                  |
| <i>CEACAM6</i>                       | 2.02        | 2.35(<0.01, <0.05)             |
| <i>CEACAM5</i>                       | 2.37        | 2.63(<0.01, <0.05)             |
| <i>S100A8</i>                        | -3.04       | -3.34(0.03, 1)                 |
| <i>ETV6</i> <sup>c</sup>             | 1.04        | -2.71(0.01, 1)                 |
| <b><i>K369R</i> vs. <i>PLHCX</i></b> |             |                                |
| <i>KLF5</i>                          | 8.24        | 12.57(<0.01, <0.05)            |
| <i>ARHGAP5</i> <sup>a</sup>          | 39.20       | -∞(<0.01, <0.05)               |
| <i>MFAP5</i> <sup>a</sup>            | 25.90       | 39.16(<0.01, <0.05)            |
| <i>BDKRB1</i> <sup>a</sup>           | 1.34        | 59.48(<0.01, <0.05)            |
| <i>SHC1</i> <sup>a</sup>             | -1.34       | ∞(<0.01, <0.05)                |
| <i>CD44</i> <sup>b</sup>             | 1.76        | 1.91(<0.01, <0.05)             |
| <i>CEACAM5</i>                       | -5.46       | -3.96(<0.01, 0.21)             |
| <i>S100A8</i>                        | -3.64       | -3.37(0.03, 1)                 |
| <i>ALDH1A1</i>                       | 12.08       | -13.7(0.01, 0.51)              |
| <i>GJA1</i>                          | -2.03       | -3.16(0.04, 1)                 |
| <i>LTBP1</i>                         | -4.41       | -3.36(0.01, 0.55)              |
| <i>SEMA3C</i>                        | 2.07        | 2.15(<0.01, 0.09)              |
| <i>SLC40A1</i>                       | -4.12       | -3.97(0.04, 1)                 |
| <i>VGF</i>                           | 10.10       | 18.32(<0.01, 0.16)             |
| <i>WIF1</i>                          | -19.92      | -18.13(<0.01, 0.19)            |
| <i>AXL</i>                           | 4.07        | 3.09(<0.01, <0.05)             |
| <i>CCND3</i>                         | -3.98       | -2.76(<0.01, <0.05)            |
| <i>DKK1</i>                          | -3.69       | -2.44(<0.01, <0.05)            |
| <i>GAS6</i>                          | 2.93        | 4.16(<0.01, <0.05)             |
| <i>IGFBP3</i>                        | -3.72       | -2.52(<0.01, <0.05)            |

|                          |       |                     |
|--------------------------|-------|---------------------|
| <i>LBH</i>               | -9.01 | -7.55(<0.01, <0.05) |
| <i>TACSTD2</i>           | 13.00 | 14.15(<0.01, <0.05) |
| <i>TSPAN8</i>            | -9.26 | -6.97(<0.01, <0.05) |
| <i>FSIP1</i>             | -3.04 | -9.16(<0.01, <0.05) |
| <i>CYR61</i>             | 1.44  | 2.66(<0.01, <0.05)  |
| <i>ETV6<sup>c</sup></i>  | -1.06 | 7.6(<0.01, <0.05)   |
| <i>ACTA2<sup>c</sup></i> | 1.08  | 2.94(0.03, 0.89)    |

---

Notes: A minus sign “-” indicates downregulation for a gene.

<sup>a</sup> Genes that showed >20 fold of changes in RNA-Seq analysis but could not be validated by qPCR. This group of genes were thus removed from the list of differentially expressed genes.

<sup>b</sup> Genes that had 1.5-2 fold of change in RNA-Seq analysis and were validated by qPCR. This group of genes were included in the list of differentially expressed genes.

<sup>c</sup> Genes that had 1.5-20 fold of change and *p* values < 0.05 in RNA-Seq analysis but could not be validated by qPCR. Three of the 29 (10.3%) genes belong to this group.

Table S3. Differentially expressed genes between KLF5-expressing DU 145 xenograft tumors and the PLHCX vector control as identified by RNA-Seq analysis.

| Gene name                  | FPKM     |          | Fold change | p value |
|----------------------------|----------|----------|-------------|---------|
|                            | KLF5     | PLHCX    |             |         |
| <i>Upregulated by KLF5</i> |          |          |             |         |
| <i>KLF5</i>                | 114.215  | 8.862    | 12.888      | 0.000   |
| <i>HMSD</i>                | 15.990   | 1.266    | 12.625      | 0.001   |
| <i>AK3</i>                 | 8.615    | 1.225    | 7.032       | 0.035   |
| <i>AC004854.4</i>          | 8.357    | 1.224    | 6.825       | 0.035   |
| <i>ALG13-AS1</i>           | 12.484   | 1.928    | 6.474       | 0.004   |
| <i>PPAN-P2RY11</i>         | 8.616    | 1.459    | 5.907       | 0.035   |
| <i>FNTA</i>                | 16.607   | 2.977    | 5.578       | 0.001   |
| <i>AL158147.2</i>          | 21.318   | 3.959    | 5.384       | 0.000   |
| <i>COPZ2</i>               | 28.759   | 6.220    | 4.624       | 0.000   |
| <i>RNU4ATAC</i>            | 33.010   | 7.956    | 4.149       | 0.000   |
| <i>FXVD3</i>               | 31.482   | 8.052    | 3.910       | 0.000   |
| <i>DKFZP547B0914</i>       | 19.644   | 5.511    | 3.565       | 0.005   |
| <i>AL353354.1</i>          | 723.097  | 219.787  | 3.290       | 0.000   |
| <i>RN7SL1</i>              | 5579.920 | 1860.130 | 3.000       | 0.000   |
| <i>ETV6</i>                | 23.555   | 8.400    | 2.804       | 0.008   |
| <i>CGA</i>                 | 45.846   | 16.687   | 2.747       | 0.000   |
| <i>CEACAM5</i>             | 57.793   | 21.962   | 2.632       | 0.000   |
| <i>AL591806.1</i>          | 29.296   | 11.273   | 2.599       | 0.005   |
| <i>PRR11</i>               | 30.649   | 11.851   | 2.586       | 0.003   |
| <i>AC138393.1</i>          | 17.516   | 6.808    | 2.573       | 0.027   |
| <i>AC008914.1</i>          | 118.405  | 47.828   | 2.476       | 0.000   |
| <i>CEACAM6</i>             | 157.550  | 66.940   | 2.354       | 0.000   |
| <i>EMP2</i>                | 34.066   | 16.716   | 2.038       | 0.008   |
| <i>CMTM1</i>               | 27.038   | 13.347   | 2.026       | 0.030   |
| <i>RP11-552F3.13</i>       | 47.964   | 23.826   | 2.013       | 0.003   |
| <i>ARRB1</i>               | 35.160   | 17.986   | 1.955       | 0.010   |
| <i>CRABP2</i>              | 50.292   | 27.180   | 1.850       | 0.007   |
| <i>RP11-27M24.1</i>        | 44.919   | 24.336   | 1.846       | 0.012   |
| <i>AC007193.8</i>          | 47.986   | 27.028   | 1.775       | 0.016   |
| <i>MT-ND5</i>              | 3616.840 | 2081.760 | 1.737       | 0.000   |
| <i>EXOC6</i>               | 32.049   | 18.600   | 1.723       | 0.038   |
| <i>MT-ND6</i>              | 4429.100 | 2600.980 | 1.703       | 0.000   |
| <i>APOC1</i>               | 49.624   | 29.776   | 1.667       | 0.018   |

|                      |        |        |       |       |
|----------------------|--------|--------|-------|-------|
| <i>CTD-2562J17.9</i> | 66.424 | 39.891 | 1.665 | 0.005 |
| <i>PFKFB3</i>        | 40.620 | 24.799 | 1.638 | 0.036 |
| <i>PTCHD3P1</i>      | 60.013 | 36.814 | 1.630 | 0.011 |
| <i>CTD-2562J17.7</i> | 46.326 | 29.122 | 1.591 | 0.040 |
| <i>MDK</i>           | 49.252 | 31.558 | 1.561 | 0.035 |
| <i>TMEM64</i>        | 57.061 | 37.546 | 1.520 | 0.032 |
| <i>MDM2</i>          | 64.070 | 42.200 | 1.518 | 0.021 |

***Downregulated by KLF5***

|                     |         |         |       |       |
|---------------------|---------|---------|-------|-------|
| <i>RP11-612B6.2</i> | 5.340   | 30.278  | 0.176 | 0.000 |
| <i>UBE3D</i>        | 2.056   | 11.599  | 0.177 | 0.036 |
| <i>RP3-410C9.1</i>  | 27.469  | 104.813 | 0.262 | 0.000 |
| <i>GDPD3</i>        | 3.348   | 12.115  | 0.276 | 0.050 |
| <i>SNORD3B-1</i>    | 4.469   | 16.111  | 0.277 | 0.017 |
| <i>SNORD3A</i>      | 10.244  | 34.498  | 0.297 | 0.001 |
| <i>SI00A8</i>       | 3.954   | 13.194  | 0.300 | 0.031 |
| <i>AC007216.2</i>   | 10.512  | 31.451  | 0.334 | 0.002 |
| <i>AP003068.12</i>  | 9.924   | 25.094  | 0.395 | 0.012 |
| <i>SI00A9</i>       | 56.525  | 130.623 | 0.433 | 0.000 |
| <i>A2M</i>          | 12.228  | 28.233  | 0.433 | 0.021 |
| <i>SIPA1L3</i>      | 10.865  | 24.503  | 0.443 | 0.030 |
| <i>BPIFA1</i>       | 17.494  | 38.146  | 0.459 | 0.011 |
| <i>FXVD2</i>        | 13.501  | 28.970  | 0.466 | 0.033 |
| <i>CCDC57</i>       | 16.486  | 35.029  | 0.471 | 0.019 |
| <i>RP3-406A7.7</i>  | 14.582  | 29.020  | 0.502 | 0.037 |
| <i>AL669831.1</i>   | 18.380  | 35.753  | 0.514 | 0.042 |
| <i>FAM95B1</i>      | 27.955  | 51.488  | 0.543 | 0.014 |
| <i>AKR1B1</i>       | 484.003 | 841.481 | 0.575 | 0.000 |
| <i>RP11-329L6.1</i> | 248.555 | 415.521 | 0.598 | 0.000 |
| <i>VEGFA</i>        | 82.999  | 136.701 | 0.607 | 0.001 |
| <i>HSPA1A</i>       | 54.166  | 85.962  | 0.630 | 0.018 |
| <i>SPTSSA</i>       | 204.517 | 323.318 | 0.633 | 0.000 |
| <i>NAPSA</i>        | 71.080  | 110.663 | 0.642 | 0.010 |
| <i>EDIL3</i>        | 69.116  | 105.562 | 0.655 | 0.016 |
| <i>HLA-F</i>        | 58.507  | 88.187  | 0.663 | 0.032 |

Notes:

1. FPKM, fragment per kilobase of exon model per million mapped reads.
2. Genes are listed according to their fold changes from high to low for those with upregulation and from high to low for those with downregulation.

Table S4. Differentially expressed genes between K369R-expressing DU 145 xenograft tumors and the PLHCX vector control as identified by RNA-Seq analysis.

| Genes name                  | FPKM    |        | Fold change | p value |
|-----------------------------|---------|--------|-------------|---------|
|                             | K369R   | PLHCX  |             |         |
| <i>Upregulated by K369R</i> |         |        |             |         |
| <i>VGF</i>                  | 10.472  | 0.572  | 18.322      | 0.003   |
| <i>ANXA8</i>                | 38.314  | 2.289  | 16.738      | 0.000   |
| <i>MYH4</i>                 | 8.619   | 0.546  | 15.792      | 0.010   |
| <i>CKM</i>                  | 14.846  | 0.943  | 15.749      | 0.000   |
| <i>ANXA8L1</i>              | 37.419  | 2.576  | 14.525      | 0.000   |
| <i>TACSTD2</i>              | 21.149  | 1.495  | 14.149      | 0.000   |
| <i>MYH2</i>                 | 9.706   | 0.687  | 14.126      | 0.005   |
| <i>BNC1</i>                 | 11.444  | 0.811  | 14.113      | 0.001   |
| <i>TNNC2</i>                | 27.393  | 1.969  | 13.914      | 0.000   |
| <i>MYH1</i>                 | 11.073  | 0.800  | 13.848      | 0.001   |
| <i>SERPINE1</i>             | 8.237   | 0.616  | 13.375      | 0.010   |
| <i>PYGM</i>                 | 6.405   | 0.491  | 13.047      | 0.035   |
| <i>KLF5</i>                 | 111.432 | 8.862  | 12.574      | 0.000   |
| <i>F13A1</i>                | 10.268  | 0.848  | 12.104      | 0.003   |
| <i>ANXA8L2</i>              | 37.092  | 3.136  | 11.827      | 0.000   |
| <i>MYLPF</i>                | 7.310   | 0.650  | 11.247      | 0.019   |
| <i>SLCO1B3</i>              | 11.608  | 1.053  | 11.028      | 0.006   |
| <i>DES</i>                  | 13.296  | 1.217  | 10.923      | 0.002   |
| <i>TNNI2</i>                | 14.065  | 1.340  | 10.496      | 0.001   |
| <i>KCNMA1</i>               | 8.945   | 0.885  | 10.107      | 0.010   |
| <i>ACTA1</i>                | 66.008  | 6.546  | 10.084      | 0.000   |
| <i>KRT6C</i>                | 6.509   | 0.806  | 8.080       | 0.035   |
| <i>NEB</i>                  | 7.483   | 0.968  | 7.733       | 0.019   |
| <i>ETV6</i>                 | 63.839  | 8.400  | 7.600       | 0.000   |
| <i>CRYAB</i>                | 39.218  | 5.245  | 7.478       | 0.000   |
| <i>SLC35F3</i>              | 6.808   | 0.953  | 7.141       | 0.035   |
| <i>PLEKHG4</i>              | 114.833 | 16.761 | 6.851       | 0.000   |
| <i>LINC00511</i>            | 13.360  | 2.117  | 6.311       | 0.006   |
| <i>SFTA1P</i>               | 9.321   | 1.501  | 6.211       | 0.020   |
| <i>ATP2A1</i>               | 34.006  | 5.539  | 6.139       | 0.000   |
| <i>PLK2</i>                 | 36.228  | 6.373  | 5.685       | 0.000   |
| <i>RP11-789C17.5</i>        | 8.578   | 1.509  | 5.683       | 0.034   |
| <i>MET</i>                  | 29.258  | 5.150  | 5.681       | 0.000   |

|                      |          |          |       |       |
|----------------------|----------|----------|-------|-------|
| <i>FNTA</i>          | 16.825   | 2.977    | 5.651 | 0.001 |
| <i>CTD-2195B23.3</i> | 15.892   | 2.857    | 5.563 | 0.002 |
| <i>SEMA7A</i>        | 12.831   | 2.385    | 5.380 | 0.011 |
| <i>AFAPIL2</i>       | 9.675    | 1.883    | 5.138 | 0.020 |
| <i>RP1-261D10.2</i>  | 10.764   | 2.203    | 4.886 | 0.031 |
| <i>RNF128</i>        | 11.007   | 2.312    | 4.760 | 0.019 |
| <i>ALG13-AS1</i>     | 8.922    | 1.928    | 4.627 | 0.034 |
| <i>CASP4</i>         | 28.529   | 6.177    | 4.619 | 0.000 |
| <i>SMYD3</i>         | 49.881   | 10.992   | 4.538 | 0.000 |
| <i>EFEMP1</i>        | 77.112   | 17.111   | 4.507 | 0.000 |
| <i>COL4A2</i>        | 55.443   | 13.236   | 4.189 | 0.000 |
| <i>GAS6</i>          | 90.968   | 21.846   | 4.164 | 0.000 |
| <i>CPA4</i>          | 49.977   | 12.151   | 4.113 | 0.000 |
| <i>ECM1</i>          | 20.393   | 5.081    | 4.013 | 0.003 |
| <i>AMIGO2</i>        | 21.374   | 5.430    | 3.937 | 0.002 |
| <i>TPM2</i>          | 42.633   | 11.012   | 3.872 | 0.000 |
| <i>FBXO32</i>        | 15.758   | 4.071    | 3.871 | 0.015 |
| <i>FRMD6</i>         | 13.058   | 3.489    | 3.742 | 0.017 |
| <i>RN7SL1</i>        | 6757.030 | 1860.130 | 3.633 | 0.000 |
| <i>TPM1</i>          | 294.597  | 82.849   | 3.556 | 0.000 |
| <i>AP001048.4</i>    | 10.627   | 2.989    | 3.555 | 0.031 |
| <i>RPPH1</i>         | 25.804   | 7.403    | 3.486 | 0.002 |
| <i>IL32</i>          | 84.076   | 24.580   | 3.421 | 0.000 |
| <i>NABP1</i>         | 35.559   | 10.469   | 3.397 | 0.000 |
| <i>CD68</i>          | 50.729   | 15.609   | 3.250 | 0.000 |
| <i>RHPN1-AS1</i>     | 11.136   | 3.436    | 3.241 | 0.045 |
| <i>SLC22A3</i>       | 11.591   | 3.582    | 3.236 | 0.045 |
| <i>SERPINA1</i>      | 44.575   | 13.793   | 3.232 | 0.000 |
| <i>FHOD3</i>         | 26.207   | 8.193    | 3.199 | 0.002 |
| <i>CCDC80</i>        | 14.828   | 4.700    | 3.155 | 0.024 |
| <i>ERAP2</i>         | 70.465   | 22.747   | 3.098 | 0.000 |
| <i>AXL</i>           | 91.550   | 29.672   | 3.085 | 0.000 |
| <i>RAMP1</i>         | 42.660   | 13.871   | 3.076 | 0.000 |
| <i>TNC</i>           | 21.568   | 7.040    | 3.064 | 0.009 |
| <i>RP11-373D23.3</i> | 16.442   | 5.413    | 3.037 | 0.020 |
| <i>SIPA1L1</i>       | 30.307   | 10.025   | 3.023 | 0.002 |
| <i>MICB</i>          | 31.818   | 10.631   | 2.993 | 0.001 |
| <i>RP11-331F9.10</i> | 179.772  | 60.100   | 2.991 | 0.000 |
| <i>COTL1</i>         | 133.256  | 45.172   | 2.950 | 0.000 |

|                      |          |          |       |       |
|----------------------|----------|----------|-------|-------|
| <i>ACTA2</i>         | 17.792   | 6.060    | 2.936 | 0.026 |
| <i>DCBLD2</i>        | 191.382  | 66.149   | 2.893 | 0.000 |
| <i>SI00A2</i>        | 38.861   | 13.495   | 2.880 | 0.000 |
| <i>ARHGAP23</i>      | 14.966   | 5.200    | 2.878 | 0.048 |
| <i>CD70</i>          | 50.632   | 17.622   | 2.873 | 0.000 |
| <i>AC037459.4</i>    | 15.097   | 5.275    | 2.862 | 0.031 |
| <i>KRTAP5-2</i>      | 13.748   | 4.825    | 2.849 | 0.038 |
| <i>ARNTL2</i>        | 20.025   | 7.042    | 2.844 | 0.014 |
| <i>RP11-661A12.4</i> | 32.747   | 11.583   | 2.827 | 0.001 |
| <i>COL4A1</i>        | 14.229   | 5.067    | 2.808 | 0.048 |
| <i>MATN2</i>         | 16.235   | 5.832    | 2.784 | 0.020 |
| <i>HSPG2</i>         | 40.513   | 14.577   | 2.779 | 0.000 |
| <i>CDA</i>           | 70.743   | 25.958   | 2.725 | 0.000 |
| <i>DGKA</i>          | 27.095   | 10.032   | 2.701 | 0.006 |
| <i>FHL2</i>          | 55.330   | 20.616   | 2.684 | 0.000 |
| <i>C6orf141</i>      | 16.951   | 6.334    | 2.676 | 0.040 |
| <i>BMP1</i>          | 92.915   | 34.788   | 2.671 | 0.000 |
| <i>EPB41L2</i>       | 47.870   | 18.019   | 2.657 | 0.000 |
| <i>CYR61</i>         | 54.856   | 20.655   | 2.656 | 0.000 |
| <i>CAV1</i>          | 105.312  | 40.444   | 2.604 | 0.000 |
| <i>RP11-793A3.1</i>  | 14.433   | 5.645    | 2.557 | 0.048 |
| <i>CFB</i>           | 16.586   | 6.505    | 2.550 | 0.040 |
| <i>SYTL2</i>         | 18.699   | 7.431    | 2.516 | 0.033 |
| <i>RP11-265D17.2</i> | 38.372   | 15.314   | 2.506 | 0.001 |
| <i>TNS4</i>          | 49.861   | 20.037   | 2.488 | 0.000 |
| <i>RBPMS</i>         | 77.551   | 31.248   | 2.482 | 0.000 |
| <i>FSTL3</i>         | 54.778   | 22.122   | 2.476 | 0.000 |
| <i>LETM2</i>         | 17.679   | 7.160    | 2.469 | 0.048 |
| <i>SI00A6</i>        | 3972.900 | 1621.310 | 2.450 | 0.000 |
| <i>ANXA3</i>         | 219.748  | 90.953   | 2.416 | 0.000 |
| <i>ST5</i>           | 16.466   | 6.846    | 2.405 | 0.040 |
| <i>MF12</i>          | 81.037   | 33.840   | 2.395 | 0.000 |
| <i>PSORS1C1</i>      | 20.938   | 8.769    | 2.388 | 0.027 |
| <i>C19orf33</i>      | 275.022  | 117.436  | 2.342 | 0.000 |
| <i>IFI27</i>         | 95.279   | 40.687   | 2.342 | 0.000 |
| <i>PHLDA3</i>        | 52.757   | 22.581   | 2.336 | 0.000 |
| <i>MOK</i>           | 66.670   | 28.558   | 2.335 | 0.000 |
| <i>MYO1B</i>         | 78.375   | 33.645   | 2.329 | 0.000 |
| <i>MAP1B</i>         | 46.126   | 20.019   | 2.304 | 0.001 |



|                      |         |         |       |       |
|----------------------|---------|---------|-------|-------|
| <i>AC008914.1</i>    | 110.002 | 47.828  | 2.300 | 0.000 |
| <i>LAMC2</i>         | 36.581  | 16.042  | 2.280 | 0.004 |
| <i>RRAD</i>          | 79.468  | 34.893  | 2.277 | 0.000 |
| <i>AHR</i>           | 26.064  | 11.638  | 2.240 | 0.015 |
| <i>RP11-244F12.2</i> | 64.131  | 28.814  | 2.226 | 0.000 |
| <i>IL15RA</i>        | 22.213  | 9.987   | 2.224 | 0.022 |
| <i>CAV2</i>          | 90.549  | 40.866  | 2.216 | 0.000 |
| <i>UPP1</i>          | 60.420  | 27.270  | 2.216 | 0.000 |
| <i>PMEPA1</i>        | 74.450  | 33.633  | 2.214 | 0.000 |
| <i>JUN</i>           | 59.330  | 26.824  | 2.212 | 0.000 |
| <i>DST</i>           | 143.819 | 65.251  | 2.204 | 0.000 |
| <i>DSG2</i>          | 121.809 | 55.298  | 2.203 | 0.000 |
| <i>C3</i>            | 65.667  | 29.823  | 2.202 | 0.000 |
| <i>TNFSF9</i>        | 39.101  | 17.814  | 2.195 | 0.002 |
| <i>GFPT2</i>         | 30.617  | 13.963  | 2.193 | 0.007 |
| <i>LGALS1</i>        | 883.293 | 403.738 | 2.188 | 0.000 |
| <i>PDLIM1</i>        | 142.798 | 65.329  | 2.186 | 0.000 |
| <i>PERP</i>          | 209.049 | 95.720  | 2.184 | 0.000 |
| <i>AC034220.3</i>    | 27.476  | 12.745  | 2.156 | 0.018 |
| <i>SEMA3C</i>        | 45.203  | 20.977  | 2.155 | 0.001 |
| <i>DNAJB4</i>        | 117.186 | 54.494  | 2.150 | 0.000 |
| <i>IL18</i>          | 42.657  | 19.848  | 2.149 | 0.002 |
| <i>GADD45A</i>       | 31.320  | 14.577  | 2.149 | 0.008 |
| <i>RHOD</i>          | 85.417  | 39.978  | 2.137 | 0.000 |
| <i>UAP1</i>          | 87.608  | 41.020  | 2.136 | 0.000 |
| <i>PRKCDBP</i>       | 21.061  | 9.912   | 2.125 | 0.032 |
| <i>ZFP36L1</i>       | 170.658 | 80.614  | 2.117 | 0.000 |
| <i>RP11-124N14.3</i> | 411.790 | 195.589 | 2.105 | 0.000 |
| <i>PRR11</i>         | 24.930  | 11.851  | 2.104 | 0.031 |
| <i>VIM</i>           | 810.275 | 387.418 | 2.091 | 0.000 |
| <i>SI00A16</i>       | 410.386 | 196.574 | 2.088 | 0.000 |
| <i>P4HA2</i>         | 61.141  | 29.334  | 2.084 | 0.000 |
| <i>C19orf21</i>      | 26.650  | 12.879  | 2.069 | 0.026 |
| <i>CHI3L2</i>        | 44.060  | 21.299  | 2.069 | 0.003 |
| <i>FLNC</i>          | 49.438  | 24.001  | 2.060 | 0.002 |
| <i>TUBA4A</i>        | 153.675 | 74.727  | 2.056 | 0.000 |
| <i>KLF6</i>          | 38.874  | 19.104  | 2.035 | 0.009 |
| <i>MAN2A1</i>        | 28.508  | 14.211  | 2.006 | 0.024 |
| <i>PEA15</i>         | 77.424  | 38.872  | 1.992 | 0.000 |

|                     |         |         |       |       |
|---------------------|---------|---------|-------|-------|
| <i>ESYT1</i>        | 77.718  | 39.029  | 1.991 | 0.000 |
| <i>AC002472.1</i>   | 27.525  | 13.940  | 1.974 | 0.021 |
| <i>RALB</i>         | 41.912  | 21.251  | 1.972 | 0.008 |
| <i>DOCK9</i>        | 23.172  | 11.760  | 1.970 | 0.044 |
| <i>HERPUD1</i>      | 174.294 | 89.202  | 1.954 | 0.000 |
| <i>EHD2</i>         | 58.498  | 29.994  | 1.950 | 0.001 |
| <i>PTPRF</i>        | 109.501 | 56.156  | 1.950 | 0.000 |
| <i>TNFAIP2</i>      | 135.051 | 69.668  | 1.939 | 0.000 |
| <i>RP11-79P5.2</i>  | 43.974  | 22.701  | 1.937 | 0.007 |
| <i>RAB32</i>        | 33.686  | 17.399  | 1.936 | 0.018 |
| <i>DDIT3</i>        | 36.701  | 19.172  | 1.914 | 0.017 |
| <i>CD44</i>         | 205.617 | 107.557 | 1.912 | 0.000 |
| <i>HSPB1</i>        | 544.691 | 285.448 | 1.908 | 0.000 |
| <i>CLIC4</i>        | 139.391 | 73.083  | 1.907 | 0.000 |
| <i>TGM2</i>         | 373.898 | 196.512 | 1.903 | 0.000 |
| <i>ZNF395</i>       | 30.213  | 15.902  | 1.900 | 0.020 |
| <i>AP1S1</i>        | 95.129  | 50.215  | 1.894 | 0.000 |
| <i>TINAGL1</i>      | 34.950  | 18.493  | 1.890 | 0.020 |
| <i>SMS</i>          | 58.105  | 30.860  | 1.883 | 0.001 |
| <i>CYBRD1</i>       | 67.271  | 35.733  | 1.883 | 0.001 |
| <i>TRNP1</i>        | 121.897 | 65.146  | 1.871 | 0.000 |
| <i>FGFR1</i>        | 40.718  | 21.773  | 1.870 | 0.011 |
| <i>ATP2B4</i>       | 49.132  | 26.290  | 1.869 | 0.006 |
| <i>NTAN1</i>        | 29.602  | 15.988  | 1.852 | 0.027 |
| <i>RP5-977B1.11</i> | 179.003 | 96.970  | 1.846 | 0.000 |
| <i>CHST3</i>        | 36.918  | 20.021  | 1.844 | 0.025 |
| <i>SATI</i>         | 420.157 | 228.447 | 1.839 | 0.000 |
| <i>LAMA3</i>        | 30.493  | 16.593  | 1.838 | 0.030 |
| <i>FHOD1</i>        | 39.486  | 21.523  | 1.835 | 0.015 |
| <i>KRT19</i>        | 434.863 | 237.147 | 1.834 | 0.000 |
| <i>AHNAK2</i>       | 76.019  | 41.480  | 1.833 | 0.001 |
| <i>LOXL2</i>        | 85.583  | 47.042  | 1.819 | 0.000 |
| <i>BMI1</i>         | 101.806 | 56.228  | 1.811 | 0.000 |
| <i>EPN2</i>         | 38.010  | 21.042  | 1.806 | 0.021 |
| <i>SH3BGRL3</i>     | 129.933 | 72.133  | 1.801 | 0.000 |
| <i>SI00A11</i>      | 866.858 | 486.623 | 1.781 | 0.000 |
| <i>SLC25A37</i>     | 79.600  | 44.839  | 1.775 | 0.001 |
| <i>OCIAD1-AS1</i>   | 32.064  | 18.132  | 1.768 | 0.037 |
| <i>ASAP1</i>        | 55.978  | 31.663  | 1.768 | 0.005 |

|                      |         |         |       |       |
|----------------------|---------|---------|-------|-------|
| <i>ITGB4</i>         | 50.391  | 28.695  | 1.756 | 0.010 |
| <i>TPST2</i>         | 26.163  | 14.916  | 1.754 | 0.046 |
| <i>ADAM9</i>         | 231.257 | 132.213 | 1.749 | 0.000 |
| <i>RHOC</i>          | 171.312 | 98.020  | 1.748 | 0.000 |
| <i>HSPH1</i>         | 91.161  | 52.275  | 1.744 | 0.000 |
| <i>ANKRD13A</i>      | 121.072 | 69.742  | 1.736 | 0.000 |
| <i>RP11-218E20.5</i> | 63.748  | 36.784  | 1.733 | 0.004 |
| <i>PINK1</i>         | 34.054  | 19.654  | 1.733 | 0.031 |
| <i>DYNC1H1</i>       | 62.950  | 36.366  | 1.731 | 0.005 |
| <i>OPTN</i>          | 56.207  | 32.486  | 1.730 | 0.006 |
| <i>MICAL3</i>        | 99.017  | 57.595  | 1.719 | 0.000 |
| <i>HMOX2</i>         | 37.408  | 21.764  | 1.719 | 0.028 |
| <i>MMP24</i>         | 40.169  | 23.420  | 1.715 | 0.025 |
| <i>RP5-956O18.3</i>  | 80.550  | 47.007  | 1.714 | 0.001 |
| <i>SCAMP1</i>        | 35.230  | 20.623  | 1.708 | 0.034 |
| <i>CTB-151G24.1</i>  | 35.071  | 20.536  | 1.708 | 0.034 |
| <i>PTCHD3P1</i>      | 62.758  | 36.814  | 1.705 | 0.005 |
| <i>GALNT2</i>        | 82.508  | 48.564  | 1.699 | 0.001 |
| <i>CHORDC1</i>       | 48.406  | 28.518  | 1.697 | 0.017 |
| <i>RIPK2</i>         | 33.032  | 19.623  | 1.683 | 0.041 |
| <i>DNAJB2</i>        | 44.147  | 26.300  | 1.679 | 0.024 |
| <i>CHST15</i>        | 33.534  | 19.982  | 1.678 | 0.041 |
| <i>PTRF</i>          | 178.177 | 106.867 | 1.667 | 0.000 |
| <i>AL358113.1</i>    | 128.441 | 77.311  | 1.661 | 0.000 |
| <i>CDV3</i>          | 96.284  | 58.153  | 1.656 | 0.001 |
| <i>PYGL</i>          | 175.046 | 106.138 | 1.649 | 0.000 |
| <i>GPX1</i>          | 196.375 | 119.217 | 1.647 | 0.000 |
| <i>MYH9</i>          | 187.199 | 113.668 | 1.647 | 0.000 |
| <i>MYL9</i>          | 74.791  | 45.453  | 1.645 | 0.005 |
| <i>PITX1</i>         | 63.756  | 38.790  | 1.644 | 0.008 |
| <i>PDLIM2</i>        | 39.760  | 24.213  | 1.642 | 0.047 |
| <i>TJP2</i>          | 35.282  | 21.534  | 1.638 | 0.048 |
| <i>TES</i>           | 56.987  | 34.892  | 1.633 | 0.012 |
| <i>BAIAP2</i>        | 38.412  | 23.572  | 1.630 | 0.043 |
| <i>CLDN1</i>         | 60.981  | 37.454  | 1.628 | 0.012 |
| <i>ARPC1B</i>        | 286.184 | 175.931 | 1.627 | 0.000 |
| <i>SBDS</i>          | 82.571  | 50.821  | 1.625 | 0.002 |
| <i>CDH3</i>          | 175.831 | 108.260 | 1.624 | 0.000 |
| <i>THBS1</i>         | 40.581  | 25.013  | 1.622 | 0.050 |

|                       |          |         |       |       |
|-----------------------|----------|---------|-------|-------|
| <i>NCOR2</i>          | 69.656   | 42.975  | 1.621 | 0.006 |
| <i>RP11-1017G21.4</i> | 87.567   | 54.044  | 1.620 | 0.002 |
| <i>TGFBI</i>          | 546.654  | 339.453 | 1.610 | 0.000 |
| <i>DPYSL2</i>         | 97.789   | 60.905  | 1.606 | 0.001 |
| <i>CCDC85B</i>        | 40.056   | 25.044  | 1.599 | 0.050 |
| <i>WNK1</i>           | 92.452   | 57.828  | 1.599 | 0.002 |
| <i>PMAIP1</i>         | 60.071   | 37.648  | 1.596 | 0.012 |
| <i>PTPN12</i>         | 85.915   | 53.887  | 1.594 | 0.003 |
| <i>CLIC1</i>          | 207.221  | 130.329 | 1.590 | 0.000 |
| <i>SLC39A14</i>       | 111.841  | 70.431  | 1.588 | 0.001 |
| <i>TIMP2</i>          | 178.979  | 112.751 | 1.587 | 0.000 |
| <i>PHLDA2</i>         | 49.015   | 31.043  | 1.579 | 0.027 |
| <i>DTX2</i>           | 47.167   | 29.881  | 1.578 | 0.031 |
| <i>ETS2</i>           | 92.458   | 58.710  | 1.575 | 0.003 |
| <i>GNG12</i>          | 65.095   | 41.453  | 1.570 | 0.012 |
| <i>CORO1C</i>         | 116.816  | 74.439  | 1.569 | 0.001 |
| <i>GPNI</i>           | 49.023   | 31.248  | 1.569 | 0.027 |
| <i>LAMB3</i>          | 192.053  | 122.476 | 1.568 | 0.000 |
| <i>RP11-323N12.5</i>  | 317.930  | 203.000 | 1.566 | 0.000 |
| <i>SDC1</i>           | 184.947  | 118.214 | 1.565 | 0.000 |
| <i>KIF1C</i>          | 50.033   | 32.061  | 1.561 | 0.029 |
| <i>ELAC2</i>          | 61.977   | 39.788  | 1.558 | 0.017 |
| <i>PRNP</i>           | 68.656   | 44.109  | 1.557 | 0.015 |
| <i>ZYX</i>            | 115.491  | 74.316  | 1.554 | 0.001 |
| <i>PXN</i>            | 126.043  | 81.228  | 1.552 | 0.001 |
| <i>GRAMD1B</i>        | 51.559   | 33.301  | 1.548 | 0.031 |
| <i>GNAI2</i>          | 109.923  | 71.064  | 1.547 | 0.002 |
| <i>ITGB1BP1</i>       | 99.034   | 64.081  | 1.545 | 0.002 |
| <i>TPBG</i>           | 48.001   | 31.062  | 1.545 | 0.035 |
| <i>OCLN</i>           | 48.522   | 31.470  | 1.542 | 0.035 |
| <i>HPCAL1</i>         | 92.186   | 59.824  | 1.541 | 0.003 |
| <i>PSAP</i>           | 1038.670 | 677.639 | 1.533 | 0.000 |
| <i>AGAP3</i>          | 54.712   | 35.818  | 1.527 | 0.028 |
| <i>PKM</i>            | 903.983  | 591.887 | 1.527 | 0.000 |
| <i>CRIM1</i>          | 83.614   | 54.820  | 1.525 | 0.006 |
| <i>UBE2F</i>          | 66.323   | 43.525  | 1.524 | 0.017 |
| <i>RP4-816N1.7</i>    | 86.716   | 57.003  | 1.521 | 0.008 |
| <i>BCAP29</i>         | 60.719   | 40.020  | 1.517 | 0.029 |
| <i>ALDH2</i>          | 59.704   | 39.409  | 1.515 | 0.027 |

|                 |          |          |       |       |
|-----------------|----------|----------|-------|-------|
| <i>ARMC10</i>   | 51.978   | 34.329   | 1.514 | 0.042 |
| <i>CLTB</i>     | 61.345   | 40.520   | 1.514 | 0.023 |
| <i>MYO1C</i>    | 95.893   | 63.529   | 1.509 | 0.005 |
| <i>PABPC1</i>   | 1284.340 | 851.297  | 1.509 | 0.000 |
| <i>MT-ND6</i>   | 3916.780 | 2600.980 | 1.506 | 0.000 |
| <i>TSPO</i>     | 126.345  | 84.035   | 1.503 | 0.001 |
| <i>PPP1R14B</i> | 114.594  | 76.300   | 1.502 | 0.002 |
| <i>DPP9</i>     | 100.989  | 67.257   | 1.502 | 0.004 |
| <i>SPARC</i>    | 127.393  | 84.847   | 1.501 | 0.001 |

***Downregulated by K369R***

|                     |        |         |       |       |
|---------------------|--------|---------|-------|-------|
| <i>WIF1</i>         | 0.647  | 11.735  | 0.055 | 0.004 |
| <i>ALDH1A1</i>      | 0.684  | 9.367   | 0.073 | 0.012 |
| <i>C8orf4</i>       | 5.543  | 72.601  | 0.076 | 0.000 |
| <i>NELL2</i>        | 2.282  | 24.138  | 0.095 | 0.000 |
| <i>COL14A1</i>      | 3.684  | 37.427  | 0.098 | 0.000 |
| <i>CRISPLD1</i>     | 2.569  | 26.027  | 0.099 | 0.000 |
| <i>NPNT</i>         | 0.969  | 9.178   | 0.106 | 0.012 |
| <i>FSIP1</i>        | 3.543  | 32.451  | 0.109 | 0.000 |
| <i>A2M</i>          | 3.447  | 28.233  | 0.122 | 0.000 |
| <i>NDNF</i>         | 1.842  | 14.025  | 0.131 | 0.002 |
| <i>LBH</i>          | 5.751  | 43.416  | 0.132 | 0.000 |
| <i>SFTPB</i>        | 18.007 | 135.699 | 0.133 | 0.000 |
| <i>DEFB1</i>        | 7.233  | 54.110  | 0.134 | 0.000 |
| <i>EHF</i>          | 1.653  | 12.356  | 0.134 | 0.008 |
| <i>CLDN2</i>        | 5.762  | 42.917  | 0.134 | 0.000 |
| <i>SPINK1</i>       | 7.674  | 55.199  | 0.139 | 0.000 |
| <i>TSPAN8</i>       | 4.187  | 29.167  | 0.144 | 0.000 |
| <i>RSPO3</i>        | 2.216  | 15.124  | 0.147 | 0.005 |
| <i>C5</i>           | 6.989  | 46.339  | 0.151 | 0.000 |
| <i>CXCL17</i>       | 7.094  | 46.001  | 0.154 | 0.000 |
| <i>TMTC2</i>        | 2.609  | 16.792  | 0.155 | 0.003 |
| <i>AQP3</i>         | 46.725 | 300.097 | 0.156 | 0.000 |
| <i>CGA</i>          | 2.615  | 16.687  | 0.157 | 0.003 |
| <i>UBE3D</i>        | 1.878  | 11.599  | 0.162 | 0.013 |
| <i>RGCC</i>         | 6.741  | 40.895  | 0.165 | 0.000 |
| <i>CTD-2269F5.1</i> | 2.787  | 16.338  | 0.171 | 0.003 |
| <i>NPR3</i>         | 2.908  | 16.285  | 0.179 | 0.003 |
| <i>CRLF1</i>        | 2.314  | 12.786  | 0.181 | 0.022 |

|                      |        |         |       |       |
|----------------------|--------|---------|-------|-------|
| <i>PER1</i>          | 3.689  | 19.843  | 0.186 | 0.002 |
| <i>BCOR</i>          | 1.756  | 9.373   | 0.187 | 0.039 |
| <i>PAG1</i>          | 2.691  | 13.603  | 0.198 | 0.013 |
| <i>AGR2</i>          | 3.506  | 17.541  | 0.200 | 0.005 |
| <i>SAMD11</i>        | 2.813  | 13.922  | 0.202 | 0.013 |
| <i>PRR5L</i>         | 2.356  | 11.314  | 0.208 | 0.036 |
| <i>RP11-4K16.2</i>   | 8.444  | 40.344  | 0.209 | 0.000 |
| <i>SLC7A2</i>        | 4.849  | 22.805  | 0.213 | 0.001 |
| <i>SUSD2</i>         | 7.252  | 33.912  | 0.214 | 0.000 |
| <i>GGT5</i>          | 2.779  | 12.665  | 0.219 | 0.022 |
| <i>RP11-160E2.6</i>  | 2.451  | 11.163  | 0.220 | 0.036 |
| <i>GPCPD1</i>        | 6.089  | 27.694  | 0.220 | 0.001 |
| <i>LPAR1</i>         | 19.769 | 89.065  | 0.222 | 0.000 |
| <i>NR4A1</i>         | 31.531 | 141.570 | 0.223 | 0.000 |
| <i>NAPSA</i>         | 24.679 | 110.663 | 0.223 | 0.000 |
| <i>IGFBP2</i>        | 18.905 | 84.316  | 0.224 | 0.000 |
| <i>RP11-1100L3.8</i> | 26.887 | 118.409 | 0.227 | 0.000 |
| <i>DIRAS3</i>        | 3.372  | 14.830  | 0.227 | 0.020 |
| <i>FAM107B</i>       | 27.121 | 117.482 | 0.231 | 0.000 |
| <i>RASD1</i>         | 5.775  | 24.971  | 0.231 | 0.001 |
| <i>RP3-410C9.1</i>   | 24.913 | 104.813 | 0.238 | 0.000 |
| <i>CRIP1</i>         | 6.834  | 28.667  | 0.238 | 0.000 |
| <i>CTD-3193O13.8</i> | 3.359  | 14.055  | 0.239 | 0.020 |
| <i>RP11-806O11.1</i> | 4.113  | 17.154  | 0.240 | 0.011 |
| <i>CISH</i>          | 3.375  | 13.924  | 0.242 | 0.032 |
| <i>SYNE1</i>         | 10.605 | 43.667  | 0.243 | 0.000 |
| <i>SLC40A1</i>       | 2.942  | 11.694  | 0.252 | 0.036 |
| <i>CEACAM5</i>       | 5.547  | 21.962  | 0.253 | 0.004 |
| <i>ECH1</i>          | 5.910  | 22.828  | 0.259 | 0.003 |
| <i>DAPK1</i>         | 6.570  | 25.231  | 0.260 | 0.001 |
| <i>EDIL3</i>         | 27.967 | 105.562 | 0.265 | 0.000 |
| <i>ITPR1</i>         | 5.323  | 20.057  | 0.265 | 0.006 |
| <i>GDF15</i>         | 16.248 | 60.971  | 0.266 | 0.000 |
| <i>SNORD3B-2</i>     | 4.320  | 15.945  | 0.271 | 0.028 |
| <i>GALNT11</i>       | 37.995 | 139.150 | 0.273 | 0.000 |
| <i>NR4A3</i>         | 5.657  | 20.679  | 0.274 | 0.006 |
| <i>SNORD3A</i>       | 9.456  | 34.498  | 0.274 | 0.000 |
| <i>ASS1</i>          | 19.596 | 70.904  | 0.276 | 0.000 |
| <i>RP11-262H14.4</i> | 5.424  | 19.618  | 0.276 | 0.010 |

|                      |         |         |       |       |
|----------------------|---------|---------|-------|-------|
| <i>SNORD3C</i>       | 3.970   | 14.223  | 0.279 | 0.020 |
| <i>ABCA8</i>         | 5.723   | 19.914  | 0.287 | 0.010 |
| <i>RP11-499O7.7</i>  | 10.257  | 35.645  | 0.288 | 0.001 |
| <i>SLC45A4</i>       | 12.221  | 41.484  | 0.295 | 0.000 |
| <i>SI00A8</i>        | 3.910   | 13.194  | 0.296 | 0.032 |
| <i>LTBP1</i>         | 6.097   | 20.507  | 0.297 | 0.013 |
| <i>FGL1</i>          | 4.736   | 15.835  | 0.299 | 0.028 |
| <i>PDK4</i>          | 19.506  | 65.045  | 0.300 | 0.000 |
| <i>SELENBP1</i>      | 3.974   | 13.149  | 0.302 | 0.032 |
| <i>RP5-981O7.2</i>   | 8.057   | 26.625  | 0.303 | 0.004 |
| <i>AL161784.1</i>    | 94.556  | 312.302 | 0.303 | 0.000 |
| <i>CFI</i>           | 6.503   | 21.411  | 0.304 | 0.009 |
| <i>FAM95B1</i>       | 15.717  | 51.488  | 0.305 | 0.000 |
| <i>DNAJC12</i>       | 42.262  | 138.151 | 0.306 | 0.000 |
| <i>RP11-612B6.2</i>  | 9.426   | 30.278  | 0.311 | 0.002 |
| <i>AKR1C2</i>        | 233.297 | 738.971 | 0.316 | 0.000 |
| <i>GJA1</i>          | 5.096   | 16.084  | 0.317 | 0.036 |
| <i>SPTSSA</i>        | 103.778 | 323.318 | 0.321 | 0.000 |
| <i>PEG10</i>         | 22.727  | 70.765  | 0.321 | 0.000 |
| <i>F3</i>            | 56.690  | 173.884 | 0.326 | 0.000 |
| <i>ZNF275</i>        | 5.888   | 17.886  | 0.329 | 0.024 |
| <i>CEA</i>           | 5.647   | 17.032  | 0.332 | 0.024 |
| <i>CEACAM6</i>       | 22.678  | 66.940  | 0.339 | 0.000 |
| <i>SNORD3B-1</i>     | 5.571   | 16.111  | 0.346 | 0.036 |
| <i>BPIFA1</i>        | 13.653  | 38.146  | 0.358 | 0.001 |
| <i>TFPI2</i>         | 24.744  | 69.085  | 0.358 | 0.000 |
| <i>AKR1C4</i>        | 8.071   | 22.325  | 0.362 | 0.021 |
| <i>CCND3</i>         | 26.170  | 72.238  | 0.362 | 0.000 |
| <i>STAMBPL1</i>      | 15.706  | 43.198  | 0.364 | 0.001 |
| <i>DUSP4</i>         | 24.131  | 65.123  | 0.371 | 0.000 |
| <i>CD46</i>          | 295.889 | 796.779 | 0.371 | 0.000 |
| <i>PITPNC1</i>       | 9.119   | 24.406  | 0.374 | 0.018 |
| <i>RP11-304L19.5</i> | 87.330  | 232.893 | 0.375 | 0.000 |
| <i>NBEAL2</i>        | 32.145  | 84.872  | 0.379 | 0.000 |
| <i>CTD-2562J17.7</i> | 11.044  | 29.122  | 0.379 | 0.013 |
| <i>GULP1</i>         | 14.946  | 39.215  | 0.381 | 0.002 |
| <i>CORO6</i>         | 16.327  | 42.591  | 0.383 | 0.002 |
| <i>RP11-329L6.1</i>  | 159.378 | 415.521 | 0.384 | 0.000 |
| <i>FKBP10</i>        | 11.586  | 30.160  | 0.384 | 0.009 |

|                      |         |         |       |       |
|----------------------|---------|---------|-------|-------|
| <i>CPM</i>           | 87.969  | 228.460 | 0.385 | 0.000 |
| <i>ZNF189</i>        | 7.936   | 20.497  | 0.387 | 0.025 |
| <i>EGFL7</i>         | 10.181  | 26.132  | 0.390 | 0.015 |
| <i>KLF2</i>          | 9.603   | 24.538  | 0.391 | 0.018 |
| <i>LPGAT1</i>        | 62.104  | 158.610 | 0.392 | 0.000 |
| <i>SNTB1</i>         | 8.005   | 20.294  | 0.394 | 0.045 |
| <i>IGFBP3</i>        | 112.198 | 282.378 | 0.397 | 0.000 |
| <i>SEPI1</i>         | 49.940  | 125.179 | 0.399 | 0.000 |
| <i>GYLTL1B</i>       | 7.973   | 19.903  | 0.401 | 0.037 |
| <i>SNHG10</i>        | 14.570  | 36.333  | 0.401 | 0.005 |
| <i>NAB2</i>          | 10.969  | 27.252  | 0.403 | 0.010 |
| <i>SLC26A2</i>       | 17.314  | 42.755  | 0.405 | 0.003 |
| <i>EMC10</i>         | 88.397  | 218.070 | 0.405 | 0.000 |
| <i>AKR1C1</i>        | 124.369 | 305.135 | 0.408 | 0.000 |
| <i>DKK1</i>          | 43.967  | 107.067 | 0.411 | 0.000 |
| <i>SLC27A2</i>       | 25.079  | 60.808  | 0.412 | 0.001 |
| <i>STOM</i>          | 25.135  | 60.813  | 0.413 | 0.001 |
| <i>PCSK6</i>         | 11.796  | 28.094  | 0.420 | 0.013 |
| <i>CTD-2292P10.2</i> | 11.182  | 26.557  | 0.421 | 0.025 |
| <i>SIPAIL3</i>       | 10.400  | 24.503  | 0.424 | 0.031 |
| <i>RHOBTB2</i>       | 31.149  | 73.202  | 0.426 | 0.000 |
| <i>APOE</i>          | 15.420  | 36.132  | 0.427 | 0.008 |
| <i>FGA</i>           | 132.994 | 309.543 | 0.430 | 0.000 |
| <i>AGPAT2</i>        | 52.204  | 120.501 | 0.433 | 0.000 |
| <i>IRX3</i>          | 19.344  | 44.558  | 0.434 | 0.004 |
| <i>CADM1</i>         | 17.329  | 39.885  | 0.434 | 0.008 |
| <i>XBP1</i>          | 110.761 | 252.458 | 0.439 | 0.000 |
| <i>SLPI</i>          | 79.611  | 181.303 | 0.439 | 0.000 |
| <i>LPIN2</i>         | 13.024  | 29.564  | 0.441 | 0.034 |
| <i>SLC46A3</i>       | 22.034  | 49.932  | 0.441 | 0.003 |
| <i>RGS3</i>          | 10.398  | 23.473  | 0.443 | 0.043 |
| <i>ADM</i>           | 12.255  | 27.610  | 0.444 | 0.041 |
| <i>RP13-582O9.5</i>  | 13.270  | 29.685  | 0.447 | 0.034 |
| <i>MEGF9</i>         | 62.134  | 138.216 | 0.450 | 0.000 |
| <i>AC007216.2</i>    | 14.178  | 31.451  | 0.451 | 0.028 |
| <i>IMPA2</i>         | 73.605  | 161.903 | 0.455 | 0.000 |
| <i>EGLN3</i>         | 11.660  | 25.506  | 0.457 | 0.036 |
| <i>MAPK4</i>         | 16.892  | 36.862  | 0.458 | 0.014 |
| <i>JUP</i>           | 65.017  | 140.981 | 0.461 | 0.000 |



|                    |         |         |       |       |
|--------------------|---------|---------|-------|-------|
| <i>CTSL1</i>       | 49.462  | 107.132 | 0.462 | 0.000 |
| <i>ERRF11</i>      | 92.874  | 201.124 | 0.462 | 0.000 |
| <i>AKR1C3</i>      | 89.255  | 190.895 | 0.468 | 0.000 |
| <i>AHCYL2</i>      | 18.057  | 38.125  | 0.474 | 0.017 |
| <i>GPX2</i>        | 149.142 | 313.295 | 0.476 | 0.000 |
| <i>OLFM2</i>       | 15.330  | 32.127  | 0.477 | 0.031 |
| <i>FGG</i>         | 245.031 | 512.632 | 0.478 | 0.000 |
| <i>DPP7</i>        | 28.479  | 59.546  | 0.478 | 0.003 |
| <i>TRMT11</i>      | 18.452  | 38.560  | 0.479 | 0.017 |
| <i>HILPDA</i>      | 14.534  | 30.335  | 0.479 | 0.038 |
| <i>FXYD2</i>       | 13.887  | 28.970  | 0.479 | 0.046 |
| <i>EPB41L5</i>     | 11.930  | 24.854  | 0.480 | 0.050 |
| <i>LIF</i>         | 21.958  | 45.212  | 0.486 | 0.007 |
| <i>SFTA3</i>       | 20.505  | 42.218  | 0.486 | 0.012 |
| <i>ANXA4</i>       | 92.587  | 189.726 | 0.488 | 0.000 |
| <i>IDH2</i>        | 38.598  | 79.055  | 0.488 | 0.000 |
| <i>RDH10</i>       | 34.193  | 69.718  | 0.490 | 0.002 |
| <i>GLRX</i>        | 25.037  | 50.721  | 0.494 | 0.009 |
| <i>ABCA2</i>       | 17.830  | 36.083  | 0.494 | 0.021 |
| <i>CMTM8</i>       | 19.561  | 39.567  | 0.494 | 0.020 |
| <i>PLAGL1</i>      | 18.526  | 37.210  | 0.498 | 0.024 |
| <i>TP53INP2</i>    | 28.309  | 56.548  | 0.501 | 0.007 |
| <i>PPP2R1B</i>     | 19.648  | 38.965  | 0.504 | 0.026 |
| <i>TMEM205</i>     | 44.369  | 87.696  | 0.506 | 0.001 |
| <i>FBXW2</i>       | 40.619  | 80.010  | 0.508 | 0.001 |
| <i>ATP11A</i>      | 18.818  | 37.011  | 0.508 | 0.024 |
| <i>BTG1</i>        | 55.059  | 107.335 | 0.513 | 0.000 |
| <i>IQCJ-SCHIP1</i> | 22.400  | 43.570  | 0.514 | 0.020 |
| <i>CCDC64</i>      | 22.176  | 43.024  | 0.515 | 0.020 |
| <i>PDE4D</i>       | 37.305  | 72.374  | 0.515 | 0.002 |
| <i>IFI30</i>       | 24.162  | 46.735  | 0.517 | 0.018 |
| <i>PON3</i>        | 18.510  | 35.771  | 0.517 | 0.042 |
| <i>CRLS1</i>       | 32.763  | 62.844  | 0.521 | 0.006 |
| <i>CYBA</i>        | 46.944  | 89.902  | 0.522 | 0.001 |
| <i>SEMA4B</i>      | 61.826  | 118.285 | 0.523 | 0.000 |
| <i>ZNF580</i>      | 18.611  | 35.507  | 0.524 | 0.042 |
| <i>CMPK1</i>       | 77.824  | 146.820 | 0.530 | 0.000 |
| <i>PRPS2</i>       | 21.377  | 40.230  | 0.531 | 0.032 |
| <i>TM4SF1</i>      | 227.583 | 426.879 | 0.533 | 0.000 |

|                      |         |         |       |       |
|----------------------|---------|---------|-------|-------|
| <i>CTD-3149D2.4</i>  | 19.714  | 36.914  | 0.534 | 0.046 |
| <i>WDR34</i>         | 34.900  | 65.299  | 0.534 | 0.005 |
| <i>RP11-638I2.6</i>  | 33.471  | 62.506  | 0.535 | 0.008 |
| <i>NOL6</i>          | 31.210  | 58.006  | 0.538 | 0.011 |
| <i>LIMCH1</i>        | 51.693  | 95.418  | 0.542 | 0.001 |
| <i>SGPP1</i>         | 33.575  | 61.607  | 0.545 | 0.010 |
| <i>ANKRD18B</i>      | 35.485  | 64.527  | 0.550 | 0.009 |
| <i>CD320</i>         | 35.655  | 64.215  | 0.555 | 0.009 |
| <i>CEBPD</i>         | 30.012  | 53.372  | 0.562 | 0.029 |
| <i>EPAS1</i>         | 80.919  | 143.774 | 0.563 | 0.000 |
| <i>CYB561A3</i>      | 37.246  | 65.924  | 0.565 | 0.014 |
| <i>P2RY6</i>         | 25.836  | 45.655  | 0.566 | 0.034 |
| <i>FBLN1</i>         | 104.137 | 183.571 | 0.567 | 0.000 |
| <i>TXNIP</i>         | 27.967  | 49.177  | 0.569 | 0.024 |
| <i>SLC39A7</i>       | 59.108  | 103.489 | 0.571 | 0.002 |
| <i>RP11-498C9.13</i> | 46.294  | 81.019  | 0.571 | 0.006 |
| <i>DPM3</i>          | 72.793  | 127.051 | 0.573 | 0.000 |
| <i>BASP1</i>         | 102.075 | 177.309 | 0.576 | 0.000 |
| <i>WSBI</i>          | 128.679 | 222.285 | 0.579 | 0.000 |
| <i>SLC6A6</i>        | 95.011  | 164.003 | 0.579 | 0.000 |
| <i>ICAI</i>          | 27.956  | 48.245  | 0.579 | 0.031 |
| <i>SNHG9</i>         | 52.354  | 90.266  | 0.580 | 0.004 |
| <i>TSPAN13</i>       | 83.266  | 143.461 | 0.580 | 0.000 |
| <i>CHEK2</i>         | 25.681  | 44.229  | 0.581 | 0.044 |
| <i>TROAP</i>         | 31.955  | 54.956  | 0.581 | 0.031 |
| <i>SLC25A29</i>      | 26.907  | 46.236  | 0.582 | 0.037 |
| <i>PHF19</i>         | 39.831  | 68.294  | 0.583 | 0.013 |
| <i>EPCAM</i>         | 144.405 | 247.049 | 0.585 | 0.000 |
| <i>FURIN</i>         | 26.514  | 45.268  | 0.586 | 0.047 |
| <i>EPDR1</i>         | 61.710  | 105.274 | 0.586 | 0.003 |
| <i>NUB1</i>          | 53.099  | 90.327  | 0.588 | 0.006 |
| <i>HMGB3</i>         | 158.178 | 267.781 | 0.591 | 0.000 |
| <i>MALL</i>          | 28.477  | 48.161  | 0.591 | 0.042 |
| <i>ZFP36</i>         | 41.932  | 70.832  | 0.592 | 0.014 |
| <i>SCD5</i>          | 37.838  | 63.812  | 0.593 | 0.022 |
| <i>PCBP1-AS1</i>     | 30.565  | 51.479  | 0.594 | 0.047 |
| <i>TOP2A</i>         | 58.290  | 97.885  | 0.595 | 0.005 |
| <i>FADS1</i>         | 54.396  | 91.200  | 0.596 | 0.006 |
| <i>GSTT1</i>         | 117.928 | 195.902 | 0.602 | 0.000 |

|                      |          |          |       |       |
|----------------------|----------|----------|-------|-------|
| <i>G6PC3</i>         | 53.144   | 88.227   | 0.602 | 0.009 |
| <i>LAPTM4B</i>       | 156.309  | 259.263  | 0.603 | 0.000 |
| <i>MAGEF1</i>        | 38.060   | 63.085   | 0.603 | 0.030 |
| <i>FUS</i>           | 55.526   | 91.377   | 0.608 | 0.008 |
| <i>VEGFA</i>         | 83.119   | 136.701  | 0.608 | 0.002 |
| <i>VAMP2</i>         | 33.950   | 55.800   | 0.608 | 0.045 |
| <i>ATP6V1G1</i>      | 112.074  | 183.491  | 0.611 | 0.000 |
| <i>NDRG1</i>         | 78.796   | 128.642  | 0.613 | 0.002 |
| <i>NME4</i>          | 60.980   | 99.075   | 0.615 | 0.006 |
| <i>HEATR5A</i>       | 68.859   | 111.241  | 0.619 | 0.005 |
| <i>AC002117.1</i>    | 48.634   | 78.560   | 0.619 | 0.021 |
| <i>GAA</i>           | 38.875   | 62.072   | 0.626 | 0.037 |
| <i>TOB1</i>          | 161.842  | 258.256  | 0.627 | 0.000 |
| <i>TMEM9</i>         | 65.116   | 103.792  | 0.627 | 0.011 |
| <i>KIAA0101</i>      | 47.782   | 76.146   | 0.628 | 0.025 |
| <i>PGD</i>           | 88.971   | 141.607  | 0.628 | 0.002 |
| <i>UGDH</i>          | 139.882  | 222.615  | 0.628 | 0.000 |
| <i>LMO3</i>          | 94.916   | 150.887  | 0.629 | 0.002 |
| <i>CTD-2033A16.1</i> | 135.294  | 215.063  | 0.629 | 0.000 |
| <i>TXN</i>           | 296.597  | 471.437  | 0.629 | 0.000 |
| <i>IGFBP4</i>        | 228.631  | 363.118  | 0.630 | 0.000 |
| <i>ECT2</i>          | 48.138   | 76.395   | 0.630 | 0.032 |
| <i>SETD5-AS1</i>     | 57.912   | 91.676   | 0.632 | 0.014 |
| <i>LACTB2</i>        | 72.307   | 113.463  | 0.637 | 0.008 |
| <i>ICAM1</i>         | 96.112   | 150.019  | 0.641 | 0.003 |
| <i>NEAT1</i>         | 170.520  | 265.718  | 0.642 | 0.000 |
| <i>MT-ND3</i>        | 4841.790 | 7535.040 | 0.643 | 0.000 |
| <i>AHCYL1</i>        | 46.894   | 72.446   | 0.647 | 0.036 |
| <i>MBTPS1</i>        | 52.258   | 80.623   | 0.648 | 0.038 |
| <i>PTP4A1</i>        | 905.159  | 1395.760 | 0.649 | 0.000 |
| <i>NFKBIA</i>        | 88.283   | 136.083  | 0.649 | 0.005 |
| <i>SMIM14</i>        | 65.640   | 101.008  | 0.650 | 0.016 |
| <i>TMED3</i>         | 85.079   | 130.909  | 0.650 | 0.008 |
| <i>CHMP1B</i>        | 72.406   | 111.213  | 0.651 | 0.012 |
| <i>PYCR1</i>         | 57.615   | 88.068   | 0.654 | 0.026 |
| <i>STMN1</i>         | 144.843  | 219.421  | 0.660 | 0.001 |
| <i>PHPT1</i>         | 54.573   | 82.414   | 0.662 | 0.041 |
| <i>RP11-78A19.3</i>  | 230.881  | 348.665  | 0.662 | 0.000 |
| <i>CPSF6</i>         | 60.239   | 90.803   | 0.663 | 0.035 |

|                     |           |           |       |       |
|---------------------|-----------|-----------|-------|-------|
| <i>RP11-126K1.8</i> | 68.514    | 103.045   | 0.665 | 0.022 |
| <i>SMIM4</i>        | 65.855    | 98.894    | 0.666 | 0.029 |
| <i>MT-ATP8</i>      | 51538.400 | 77076.700 | 0.669 | 0.000 |

---

Note:

1. FPKM, fragment per kilobase of exon model per million mapped reads.
2. Genes are listed according to their fold changes from high to low for those with upregulation and from high to low for those with downregulation.

Table S5. Differentially expressed genes between KLF5- and K369R-expressing DU 145 xenograft tumors as identified by RNA-Seq analysis.

| Gene name                   | FPKM    |        | Fold change | p value |
|-----------------------------|---------|--------|-------------|---------|
|                             | K369R   | KLF5   |             |         |
| <i>Upregulated by K369R</i> |         |        |             |         |
| <i>MFAP5</i>                | 43.501  | 2.243  | 19.397      | 0.000   |
| <i>TNNT3</i>                | 23.101  | 1.689  | 13.676      | 0.000   |
| <i>ANXA8L2</i>              | 37.092  | 2.840  | 13.061      | 0.000   |
| <i>ANXA8</i>                | 38.314  | 3.050  | 12.561      | 0.000   |
| <i>F13A1</i>                | 10.268  | 0.841  | 12.216      | 0.003   |
| <i>SERPINE1</i>             | 8.237   | 0.680  | 12.118      | 0.011   |
| <i>VGF</i>                  | 10.472  | 0.867  | 12.084      | 0.003   |
| <i>ANXA8L1</i>              | 37.419  | 3.196  | 11.708      | 0.000   |
| <i>NEB</i>                  | 7.483   | 0.651  | 11.499      | 0.021   |
| <i>PLEKHG4</i>              | 114.833 | 10.000 | 11.484      | 0.000   |
| <i>BNC1</i>                 | 11.444  | 1.124  | 10.178      | 0.007   |
| <i>TNNC2</i>                | 27.393  | 2.802  | 9.777       | 0.000   |
| <i>TACSTD2</i>              | 21.149  | 2.180  | 9.700       | 0.000   |
| <i>MYH2</i>                 | 9.706   | 1.064  | 9.122       | 0.022   |
| <i>KRT6C</i>                | 6.509   | 0.716  | 9.093       | 0.038   |
| <i>CKM</i>                  | 14.846  | 1.648  | 9.006       | 0.001   |
| <i>MYH4</i>                 | 8.619   | 0.959  | 8.985       | 0.011   |
| <i>ACTA1</i>                | 66.008  | 8.080  | 8.169       | 0.000   |
| <i>RNF128</i>               | 11.007  | 1.356  | 8.117       | 0.007   |
| <i>MYLPF</i>                | 7.310   | 0.953  | 7.674       | 0.021   |
| <i>DES</i>                  | 13.296  | 1.867  | 7.121       | 0.002   |
| <i>SLCO1B3</i>              | 11.608  | 1.636  | 7.097       | 0.007   |
| <i>MYH1</i>                 | 11.073  | 1.563  | 7.084       | 0.007   |
| <i>PYGM</i>                 | 6.405   | 0.918  | 6.976       | 0.038   |
| <i>CRYAB</i>                | 39.218  | 5.886  | 6.663       | 0.000   |
| <i>RP11-793A3.1</i>         | 14.433  | 2.553  | 5.653       | 0.004   |
| <i>SLC22A3</i>              | 11.591  | 2.087  | 5.554       | 0.021   |
| <i>COL4A2</i>               | 55.443  | 10.356 | 5.354       | 0.000   |
| <i>RP11-338N10.3</i>        | 12.202  | 2.296  | 5.314       | 0.012   |
| <i>ATP2A1</i>               | 34.006  | 6.455  | 5.268       | 0.000   |
| <i>GDPD3</i>                | 17.125  | 3.348  | 5.115       | 0.002   |
| <i>TNNI2</i>                | 14.065  | 2.752  | 5.111       | 0.004   |
| <i>SEMA7A</i>               | 12.831  | 2.593  | 4.948       | 0.012   |

(Table S5 continued)

|                      |         |         |       |       |
|----------------------|---------|---------|-------|-------|
| <i>SI00A3</i>        | 8.655   | 1.802   | 4.803 | 0.038 |
| <i>LINC00511</i>     | 13.360  | 2.866   | 4.662 | 0.007 |
| <i>RP11-227H15.5</i> | 8.195   | 1.777   | 4.612 | 0.038 |
| <i>BX470102.3</i>    | 14.131  | 3.068   | 4.606 | 0.011 |
| <i>CPA4</i>          | 49.977  | 10.910  | 4.581 | 0.000 |
| <i>PLK2</i>          | 36.228  | 8.085   | 4.481 | 0.000 |
| <i>FBXO32</i>        | 15.758  | 3.566   | 4.419 | 0.007 |
| <i>RP1-261D10.2</i>  | 10.764  | 2.474   | 4.351 | 0.034 |
| <i>SMYD3</i>         | 49.881  | 11.856  | 4.207 | 0.000 |
| <i>RAMP1</i>         | 42.660  | 10.695  | 3.989 | 0.000 |
| <i>CTD-2195B23.3</i> | 15.892  | 4.138   | 3.841 | 0.016 |
| <i>MET</i>           | 29.258  | 7.644   | 3.828 | 0.000 |
| <i>CASP4</i>         | 28.529  | 7.533   | 3.787 | 0.000 |
| <i>NABP1</i>         | 35.559  | 9.523   | 3.734 | 0.000 |
| <i>TPM2</i>          | 42.633  | 11.571  | 3.684 | 0.000 |
| <i>GAS6</i>          | 90.968  | 25.255  | 3.602 | 0.000 |
| <i>TPM1</i>          | 294.597 | 81.844  | 3.599 | 0.000 |
| <i>CD70</i>          | 50.632  | 14.217  | 3.561 | 0.000 |
| <i>AMIGO2</i>        | 21.374  | 6.181   | 3.458 | 0.005 |
| <i>IL32</i>          | 84.076  | 24.330  | 3.456 | 0.000 |
| <i>EFEMP1</i>        | 77.112  | 22.337  | 3.452 | 0.000 |
| <i>AP003068.12</i>   | 34.059  | 9.924   | 3.432 | 0.000 |
| <i>SIPA1L1</i>       | 30.307  | 8.915   | 3.400 | 0.000 |
| <i>ENC1</i>          | 12.390  | 3.687   | 3.360 | 0.030 |
| <i>ECM1</i>          | 20.393  | 6.099   | 3.343 | 0.008 |
| <i>CLTCL1</i>        | 18.287  | 5.634   | 3.246 | 0.009 |
| <i>TNC</i>           | 21.568  | 6.844   | 3.151 | 0.005 |
| <i>FHOD3</i>         | 26.207  | 8.319   | 3.150 | 0.002 |
| <i>CCDC80</i>        | 14.828  | 4.737   | 3.130 | 0.026 |
| <i>CDA</i>           | 70.743  | 22.910  | 3.088 | 0.000 |
| <i>COL4A1</i>        | 14.229  | 4.622   | 3.079 | 0.026 |
| <i>C6orf141</i>      | 16.951  | 5.599   | 3.027 | 0.022 |
| <i>CYR61</i>         | 54.856  | 18.863  | 2.908 | 0.000 |
| <i>CD68</i>          | 50.729  | 17.820  | 2.847 | 0.000 |
| <i>LGALS1</i>        | 883.293 | 310.563 | 2.844 | 0.000 |
| <i>SI00A2</i>        | 38.861  | 13.790  | 2.818 | 0.001 |
| <i>CHI3L2</i>        | 44.060  | 15.927  | 2.766 | 0.000 |
| <i>KRTAP5-2</i>      | 13.748  | 4.993   | 2.753 | 0.041 |
| <i>COTL1</i>         | 133.256 | 48.723  | 2.735 | 0.000 |

(Table S5 continued)

|                      |          |          |       |       |
|----------------------|----------|----------|-------|-------|
| <i>GADD45A</i>       | 31.320   | 11.505   | 2.722 | 0.002 |
| <i>ETV6</i>          | 63.839   | 23.555   | 2.710 | 0.000 |
| <i>BMP1</i>          | 92.915   | 34.369   | 2.703 | 0.000 |
| <i>DDIT3</i>         | 36.701   | 13.607   | 2.697 | 0.001 |
| <i>SI00A6</i>        | 3972.900 | 1480.500 | 2.683 | 0.000 |
| <i>AC037459.4</i>    | 15.097   | 5.724    | 2.637 | 0.034 |
| <i>IFI27</i>         | 95.279   | 36.226   | 2.630 | 0.000 |
| <i>AXL</i>           | 91.550   | 34.895   | 2.624 | 0.000 |
| <i>SERPINA1</i>      | 44.575   | 17.069   | 2.611 | 0.001 |
| <i>RP11-331F9.10</i> | 179.772  | 68.998   | 2.605 | 0.000 |
| <i>UPP1</i>          | 60.420   | 23.224   | 2.602 | 0.000 |
| <i>DCBLD2</i>        | 191.382  | 73.818   | 2.593 | 0.000 |
| <i>RPPH1</i>         | 25.804   | 9.962    | 2.590 | 0.007 |
| <i>LINC00842</i>     | 18.371   | 7.094    | 2.590 | 0.035 |
| <i>MYO1B</i>         | 78.375   | 31.026   | 2.526 | 0.000 |
| <i>RP11-124N14.3</i> | 411.790  | 163.088  | 2.525 | 0.000 |
| <i>PHLDA3</i>        | 52.757   | 20.985   | 2.514 | 0.000 |
| <i>EPB41L2</i>       | 47.870   | 19.275   | 2.483 | 0.001 |
| <i>RP11-265D17.2</i> | 38.372   | 15.459   | 2.482 | 0.002 |
| <i>TANC2</i>         | 20.232   | 8.206    | 2.465 | 0.029 |
| <i>RBPM5</i>         | 77.551   | 32.326   | 2.399 | 0.000 |
| <i>MOK</i>           | 66.670   | 27.894   | 2.390 | 0.000 |
| <i>VIM</i>           | 810.275  | 341.912  | 2.370 | 0.000 |
| <i>ANXA3</i>         | 219.748  | 92.816   | 2.368 | 0.000 |
| <i>RP11-79P5.2</i>   | 43.974   | 18.881   | 2.329 | 0.001 |
| <i>AC002472.1</i>    | 27.525   | 11.872   | 2.318 | 0.011 |
| <i>MF12</i>          | 81.037   | 34.997   | 2.316 | 0.000 |
| <i>HSPB1</i>         | 544.691  | 238.354  | 2.285 | 0.000 |
| <i>HSPG2</i>         | 40.513   | 17.803   | 2.276 | 0.003 |
| <i>PERP</i>          | 209.049  | 92.275   | 2.266 | 0.000 |
| <i>TUBA4A</i>        | 153.675  | 67.878   | 2.264 | 0.000 |
| <i>TAP2</i>          | 22.471   | 9.972    | 2.253 | 0.024 |
| <i>RRAD</i>          | 79.468   | 35.275   | 2.253 | 0.000 |
| <i>PSORS1C1</i>      | 20.938   | 9.321    | 2.246 | 0.049 |
| <i>LAMC2</i>         | 36.581   | 16.313   | 2.242 | 0.006 |
| <i>PRKCDBP</i>       | 21.061   | 9.423    | 2.235 | 0.034 |
| <i>HES1</i>          | 19.466   | 8.743    | 2.226 | 0.042 |
| <i>TNFSF9</i>        | 39.101   | 17.586   | 2.223 | 0.004 |
| <i>CLDN1</i>         | 60.981   | 27.685   | 2.203 | 0.000 |

(Table S5 continued)

|                      |         |         |       |       |
|----------------------|---------|---------|-------|-------|
| <i>FHL2</i>          | 55.330  | 25.160  | 2.199 | 0.001 |
| <i>PMAIP1</i>        | 60.071  | 27.318  | 2.199 | 0.000 |
| <i>PDLIM1</i>        | 142.798 | 65.267  | 2.188 | 0.000 |
| <i>CD44</i>          | 205.617 | 94.735  | 2.170 | 0.000 |
| <i>FLNC</i>          | 49.438  | 22.796  | 2.169 | 0.001 |
| <i>MAP1B</i>         | 46.126  | 21.522  | 2.143 | 0.002 |
| <i>RP11-127L20.5</i> | 30.268  | 14.124  | 2.143 | 0.018 |
| <i>LOXL2</i>         | 85.583  | 39.946  | 2.142 | 0.000 |
| <i>JUN</i>           | 59.330  | 27.697  | 2.142 | 0.001 |
| <i>P4HA2</i>         | 61.141  | 28.630  | 2.136 | 0.000 |
| <i>SATI</i>          | 420.157 | 197.308 | 2.129 | 0.000 |
| <i>TSPAN1</i>        | 21.142  | 9.946   | 2.126 | 0.034 |
| <i>SEBOX</i>         | 44.792  | 21.087  | 2.124 | 0.005 |
| <i>ARNTL2</i>        | 20.025  | 9.434   | 2.123 | 0.049 |
| <i>IL15RA</i>        | 22.213  | 10.488  | 2.118 | 0.040 |
| <i>C19orf33</i>      | 275.022 | 130.053 | 2.115 | 0.000 |
| <i>DST</i>           | 143.819 | 68.028  | 2.114 | 0.000 |
| <i>TNS4</i>          | 49.861  | 23.629  | 2.110 | 0.002 |
| <i>ERAP2</i>         | 70.465  | 33.634  | 2.095 | 0.000 |
| <i>UAP1</i>          | 87.608  | 41.968  | 2.088 | 0.000 |
| <i>IL11</i>          | 25.090  | 12.067  | 2.079 | 0.038 |
| <i>RP5-977B1.11</i>  | 179.003 | 86.594  | 2.067 | 0.000 |
| <i>DSG2</i>          | 121.809 | 59.413  | 2.050 | 0.000 |
| <i>DGKA</i>          | 27.095  | 13.225  | 2.049 | 0.031 |
| <i>TGFBI</i>         | 546.654 | 268.946 | 2.033 | 0.000 |
| <i>MAN2A1</i>        | 28.508  | 14.042  | 2.030 | 0.035 |
| <i>DNAJB4</i>        | 117.186 | 57.921  | 2.023 | 0.000 |
| <i>AAMDC</i>         | 23.085  | 11.431  | 2.019 | 0.046 |
| <i>SI00A16</i>       | 410.386 | 203.915 | 2.013 | 0.000 |
| <i>CCDC57</i>        | 33.071  | 16.486  | 2.006 | 0.017 |
| <i>RAB32</i>         | 33.686  | 16.809  | 2.004 | 0.017 |
| <i>PMEPA1</i>        | 74.450  | 37.164  | 2.003 | 0.000 |
| <i>ESYT1</i>         | 77.718  | 38.888  | 1.998 | 0.000 |
| <i>SI00A11</i>       | 866.858 | 434.760 | 1.994 | 0.000 |
| <i>ANKRD13A</i>      | 121.072 | 61.043  | 1.983 | 0.000 |
| <i>PEA15</i>         | 77.424  | 39.163  | 1.977 | 0.000 |
| <i>GFPT2</i>         | 30.617  | 15.593  | 1.964 | 0.029 |
| <i>ADAM9</i>         | 231.257 | 117.807 | 1.963 | 0.000 |
| <i>SMS</i>           | 58.105  | 29.650  | 1.960 | 0.002 |



(Table S5 continued)

|                      |         |         |       |       |
|----------------------|---------|---------|-------|-------|
| <i>AP1S1</i>         | 95.129  | 48.553  | 1.959 | 0.000 |
| <i>HSPH1</i>         | 91.161  | 46.661  | 1.954 | 0.000 |
| <i>ITGB4</i>         | 50.391  | 25.812  | 1.952 | 0.004 |
| <i>HMOX2</i>         | 37.408  | 19.165  | 1.952 | 0.018 |
| <i>RP11-244F12.2</i> | 64.131  | 32.921  | 1.948 | 0.001 |
| <i>EMP3</i>          | 205.783 | 106.235 | 1.937 | 0.000 |
| <i>SH3BGRL3</i>      | 129.933 | 67.298  | 1.931 | 0.000 |
| <i>FADS3</i>         | 92.806  | 48.080  | 1.930 | 0.000 |
| <i>FUT8</i>          | 33.549  | 17.409  | 1.927 | 0.026 |
| <i>IL18</i>          | 42.657  | 22.139  | 1.927 | 0.014 |
| <i>HERPUD1</i>       | 174.294 | 90.963  | 1.916 | 0.000 |
| <i>CTD-2012K14.3</i> | 34.721  | 18.133  | 1.915 | 0.029 |
| <i>FHOD1</i>         | 39.486  | 20.679  | 1.910 | 0.015 |
| <i>CAVI</i>          | 105.312 | 55.163  | 1.909 | 0.000 |
| <i>BMI1</i>          | 101.806 | 53.473  | 1.904 | 0.000 |
| <i>RHOC</i>          | 171.312 | 90.299  | 1.897 | 0.000 |
| <i>LAMA3</i>         | 30.493  | 16.095  | 1.895 | 0.044 |
| <i>TNFAIP2</i>       | 135.051 | 71.580  | 1.887 | 0.000 |
| <i>CLIC4</i>         | 139.391 | 74.451  | 1.872 | 0.000 |
| <i>MICB</i>          | 31.818  | 17.001  | 1.872 | 0.048 |
| <i>HSPA1A</i>        | 101.049 | 54.166  | 1.866 | 0.000 |
| <i>ZFP36L1</i>       | 170.658 | 91.588  | 1.863 | 0.000 |
| <i>TINAGL1</i>       | 34.950  | 18.786  | 1.860 | 0.029 |
| <i>XAGE1B</i>        | 27.754  | 14.994  | 1.851 | 0.048 |
| <i>AHNAK2</i>        | 76.019  | 41.082  | 1.850 | 0.001 |
| <i>HSPA1B</i>        | 141.724 | 76.971  | 1.841 | 0.000 |
| <i>MYL9</i>          | 74.791  | 40.663  | 1.839 | 0.002 |
| <i>ELOVL1</i>        | 66.603  | 36.247  | 1.837 | 0.003 |
| <i>CDH3</i>          | 175.831 | 95.703  | 1.837 | 0.000 |
| <i>CTB-151G24.1</i>  | 35.071  | 19.164  | 1.830 | 0.032 |
| <i>FGFR1</i>         | 40.718  | 22.300  | 1.826 | 0.024 |
| <i>TRNP1</i>         | 121.897 | 66.831  | 1.824 | 0.000 |
| <i>MMP24</i>         | 40.169  | 22.033  | 1.823 | 0.024 |
| <i>CLIC1</i>         | 207.221 | 113.955 | 1.818 | 0.000 |
| <i>RHOD</i>          | 85.417  | 46.978  | 1.818 | 0.001 |
| <i>TSPAN15</i>       | 91.961  | 50.614  | 1.817 | 0.001 |
| <i>PTPRF</i>         | 109.501 | 60.494  | 1.810 | 0.000 |
| <i>RP5-1050D4.3</i>  | 57.994  | 32.065  | 1.809 | 0.009 |
| <i>PRNP</i>          | 68.656  | 38.434  | 1.786 | 0.004 |

(Table S5 continued)

|                      |         |         |       |       |
|----------------------|---------|---------|-------|-------|
| <i>PINK1</i>         | 34.054  | 19.119  | 1.781 | 0.043 |
| <i>CAV2</i>          | 90.549  | 50.883  | 1.780 | 0.001 |
| <i>PITX1</i>         | 63.756  | 35.879  | 1.777 | 0.005 |
| <i>TGM2</i>          | 373.898 | 210.836 | 1.773 | 0.000 |
| <i>SLC25A37</i>      | 79.600  | 44.922  | 1.772 | 0.002 |
| <i>UBE2F</i>         | 66.323  | 37.819  | 1.754 | 0.004 |
| <i>ATP2B4</i>        | 49.132  | 28.016  | 1.754 | 0.018 |
| <i>PHLDA2</i>        | 49.015  | 27.981  | 1.752 | 0.012 |
| <i>FSTL3</i>         | 54.778  | 31.334  | 1.748 | 0.013 |
| <i>KRT19</i>         | 434.863 | 248.959 | 1.747 | 0.000 |
| <i>PYGL</i>          | 175.046 | 100.376 | 1.744 | 0.000 |
| <i>LAMB3</i>         | 192.053 | 110.278 | 1.742 | 0.000 |
| <i>RALB</i>          | 41.912  | 24.080  | 1.741 | 0.038 |
| <i>RP11-343N15.5</i> | 40.913  | 23.674  | 1.728 | 0.035 |
| <i>MXRA7</i>         | 308.021 | 178.621 | 1.724 | 0.000 |
| <i>EHD2</i>          | 58.498  | 34.007  | 1.720 | 0.013 |
| <i>ROMO1</i>         | 236.641 | 138.083 | 1.714 | 0.000 |
| <i>CORO1C</i>        | 116.816 | 68.222  | 1.712 | 0.000 |
| <i>GPX1</i>          | 196.375 | 115.481 | 1.700 | 0.000 |
| <i>SEMA3C</i>        | 45.203  | 26.600  | 1.699 | 0.026 |
| <i>MICAL3</i>        | 99.017  | 58.320  | 1.698 | 0.001 |
| <i>ACTN1</i>         | 93.505  | 55.098  | 1.697 | 0.002 |
| <i>ITGB1BP1</i>      | 99.034  | 58.498  | 1.693 | 0.001 |
| <i>DSE</i>           | 40.937  | 24.217  | 1.690 | 0.049 |
| <i>CHRNB1</i>        | 35.437  | 20.997  | 1.688 | 0.047 |
| <i>ADII</i>          | 94.106  | 55.901  | 1.683 | 0.001 |
| <i>OPTN</i>          | 56.207  | 33.445  | 1.681 | 0.016 |
| <i>ASAP1</i>         | 55.978  | 33.348  | 1.679 | 0.020 |
| <i>TPBG</i>          | 48.001  | 28.632  | 1.676 | 0.023 |
| <i>LIMA1</i>         | 44.038  | 26.445  | 1.665 | 0.034 |
| <i>PLOD2</i>         | 494.157 | 297.940 | 1.659 | 0.000 |
| <i>PRR13</i>         | 286.297 | 172.656 | 1.658 | 0.000 |
| <i>PLAU</i>          | 222.969 | 134.475 | 1.658 | 0.000 |
| <i>SPARC</i>         | 127.393 | 77.257  | 1.649 | 0.000 |
| <i>PPP1R14B</i>      | 114.594 | 69.809  | 1.642 | 0.001 |
| <i>FLII</i>          | 114.020 | 69.468  | 1.641 | 0.001 |
| <i>GALNT2</i>        | 82.508  | 50.441  | 1.636 | 0.006 |
| <i>PKM</i>           | 903.983 | 552.652 | 1.636 | 0.000 |
| <i>ARPC1B</i>        | 286.184 | 175.348 | 1.632 | 0.000 |

(Table S5 continued)

|                      |         |         |       |       |
|----------------------|---------|---------|-------|-------|
| <i>XPO6</i>          | 68.905  | 42.363  | 1.627 | 0.014 |
| <i>PDLIM7</i>        | 61.917  | 38.132  | 1.624 | 0.022 |
| <i>RP11-354M1.2</i>  | 62.607  | 38.600  | 1.622 | 0.017 |
| <i>SBDS</i>          | 82.571  | 50.963  | 1.620 | 0.006 |
| <i>HGS</i>           | 144.122 | 89.153  | 1.617 | 0.000 |
| <i>TIMP2</i>         | 178.979 | 110.796 | 1.615 | 0.000 |
| <i>AC092964.1</i>    | 52.256  | 32.432  | 1.611 | 0.031 |
| <i>AL358113.1</i>    | 128.441 | 79.931  | 1.607 | 0.001 |
| <i>EIF6</i>          | 153.850 | 95.748  | 1.607 | 0.000 |
| <i>CARHSP1</i>       | 48.950  | 30.531  | 1.603 | 0.044 |
| <i>RP5-956O18.3</i>  | 80.550  | 50.319  | 1.601 | 0.009 |
| <i>PHF10</i>         | 45.924  | 28.691  | 1.601 | 0.050 |
| <i>DTX2</i>          | 47.167  | 29.501  | 1.599 | 0.041 |
| <i>PLAUR</i>         | 45.586  | 28.581  | 1.595 | 0.050 |
| <i>OCIAD2</i>        | 115.822 | 72.687  | 1.593 | 0.002 |
| <i>ETS2</i>          | 92.458  | 58.176  | 1.589 | 0.006 |
| <i>MYH9</i>          | 187.199 | 117.940 | 1.587 | 0.000 |
| <i>RP11-323N12.5</i> | 317.930 | 200.326 | 1.587 | 0.000 |
| <i>CDV3</i>          | 96.284  | 60.879  | 1.582 | 0.004 |
| <i>SLC39A14</i>      | 111.841 | 70.774  | 1.580 | 0.002 |
| <i>ZNF706</i>        | 105.314 | 66.795  | 1.577 | 0.003 |
| <i>COPS6</i>         | 148.858 | 95.217  | 1.563 | 0.001 |
| <i>CSRP1</i>         | 195.688 | 125.515 | 1.559 | 0.000 |
| <i>CNN3</i>          | 265.998 | 170.872 | 1.557 | 0.000 |
| <i>DNAJB1</i>        | 187.326 | 120.338 | 1.557 | 0.000 |
| <i>PTPN12</i>        | 85.915  | 55.208  | 1.556 | 0.012 |
| <i>SI00A9</i>        | 87.929  | 56.525  | 1.556 | 0.010 |
| <i>CYBRD1</i>        | 67.271  | 43.289  | 1.554 | 0.023 |
| <i>AKR1B1</i>        | 749.742 | 484.003 | 1.549 | 0.000 |
| <i>PXN</i>           | 126.043 | 81.914  | 1.539 | 0.002 |
| <i>MAP1LC3B</i>      | 63.958  | 41.586  | 1.538 | 0.032 |
| <i>LYN</i>           | 56.635  | 36.956  | 1.533 | 0.039 |
| <i>WDR45</i>         | 58.596  | 38.242  | 1.532 | 0.043 |
| <i>SLC25A39</i>      | 206.522 | 135.213 | 1.527 | 0.000 |
| <i>ATP6VID</i>       | 125.369 | 82.194  | 1.525 | 0.003 |
| <i>CMTM3</i>         | 71.918  | 47.295  | 1.521 | 0.028 |
| <i>PTRF</i>          | 178.177 | 117.178 | 1.521 | 0.000 |
| <i>RP11-218E20.5</i> | 63.748  | 41.924  | 1.521 | 0.032 |
| <i>DYNC1H1</i>       | 62.950  | 41.429  | 1.519 | 0.040 |

(Table S5 continued)

|               |          |         |       |       |
|---------------|----------|---------|-------|-------|
| <i>CLDN12</i> | 55.861   | 36.774  | 1.519 | 0.049 |
| <i>CACYBP</i> | 220.431  | 145.167 | 1.518 | 0.000 |
| <i>TMEM2</i>  | 108.870  | 71.910  | 1.514 | 0.006 |
| <i>PABPC1</i> | 1284.340 | 849.276 | 1.512 | 0.000 |
| <i>KRT7</i>   | 735.862  | 487.333 | 1.510 | 0.000 |
| <i>GLUD1</i>  | 64.077   | 42.522  | 1.507 | 0.034 |
| <i>ALDH2</i>  | 59.704   | 39.749  | 1.502 | 0.045 |
| <i>ZYX</i>    | 115.491  | 76.965  | 1.501 | 0.005 |

***Downregulated by K369R***

|                 |        |         |       |       |
|-----------------|--------|---------|-------|-------|
| <i>HMSD</i>     | 0.857  | 15.990  | 0.054 | 0.000 |
| <i>HOPX</i>     | 0.395  | 7.214   | 0.055 | 0.039 |
| <i>CGA</i>      | 2.615  | 45.846  | 0.057 | 0.000 |
| <i>ALDH1A1</i>  | 0.684  | 10.680  | 0.064 | 0.006 |
| <i>NELL2</i>    | 2.282  | 26.797  | 0.085 | 0.000 |
| <i>C8orf4</i>   | 5.543  | 60.564  | 0.092 | 0.000 |
| <i>CEACAM5</i>  | 5.547  | 57.793  | 0.096 | 0.000 |
| <i>CRISPLD1</i> | 2.569  | 25.087  | 0.102 | 0.000 |
| <i>SFTPB</i>    | 18.007 | 155.329 | 0.116 | 0.000 |
| <i>RGCC</i>     | 6.741  | 55.501  | 0.121 | 0.000 |
| <i>LBH</i>      | 5.751  | 46.696  | 0.123 | 0.000 |
| <i>COL14A1</i>  | 3.684  | 25.753  | 0.143 | 0.000 |
| <i>CEACAM6</i>  | 22.678 | 157.550 | 0.144 | 0.000 |
| <i>SCNN1G</i>   | 1.394  | 9.426   | 0.148 | 0.039 |
| <i>CRLF1</i>    | 2.314  | 14.966  | 0.155 | 0.008 |
| <i>BCOR</i>     | 1.756  | 10.964  | 0.160 | 0.022 |
| <i>C5</i>       | 6.989  | 42.775  | 0.163 | 0.000 |
| <i>SPINK1</i>   | 7.674  | 46.675  | 0.164 | 0.000 |
| <i>PER1</i>     | 3.689  | 22.431  | 0.164 | 0.000 |
| <i>AGR2</i>     | 3.506  | 21.156  | 0.166 | 0.001 |
| <i>SLC40A1</i>  | 2.942  | 17.547  | 0.168 | 0.001 |
| <i>DIRAS3</i>   | 3.372  | 19.316  | 0.175 | 0.002 |
| <i>NDNF</i>     | 1.842  | 10.501  | 0.175 | 0.022 |
| <i>FXYD3</i>    | 5.623  | 31.482  | 0.179 | 0.000 |
| <i>CRIP1</i>    | 6.834  | 37.793  | 0.181 | 0.000 |
| <i>PAG1</i>     | 2.691  | 14.391  | 0.187 | 0.008 |
| <i>DEFB1</i>    | 7.233  | 38.120  | 0.190 | 0.000 |
| <i>CXCL17</i>   | 7.094  | 36.759  | 0.193 | 0.000 |
| <i>RSPO3</i>    | 2.216  | 11.202  | 0.198 | 0.035 |

(Table S5 continued)

|                      |        |         |       |       |
|----------------------|--------|---------|-------|-------|
| <i>PRR5L</i>         | 2.356  | 11.644  | 0.202 | 0.035 |
| <i>LRRN4</i>         | 2.271  | 11.093  | 0.205 | 0.035 |
| <i>CTD-3193O13.8</i> | 3.359  | 16.219  | 0.207 | 0.007 |
| <i>TMTC2</i>         | 2.609  | 12.572  | 0.208 | 0.021 |
| <i>COPZ2</i>         | 5.995  | 28.759  | 0.208 | 0.000 |
| <i>AQP3</i>          | 46.725 | 220.837 | 0.212 | 0.000 |
| <i>GGT5</i>          | 2.779  | 13.066  | 0.213 | 0.013 |
| <i>TSPAN8</i>        | 4.187  | 19.527  | 0.214 | 0.004 |
| <i>LPAR1</i>         | 19.769 | 91.580  | 0.216 | 0.000 |
| <i>CLDN2</i>         | 5.762  | 26.035  | 0.221 | 0.000 |
| <i>SYNE1</i>         | 10.605 | 47.493  | 0.223 | 0.000 |
| <i>SUSD2</i>         | 7.252  | 32.082  | 0.226 | 0.000 |
| <i>IGFBP2</i>        | 18.905 | 82.734  | 0.228 | 0.000 |
| <i>SLC7A2</i>        | 4.849  | 20.945  | 0.232 | 0.003 |
| <i>CEA</i>           | 5.647  | 24.087  | 0.234 | 0.001 |
| <i>SFTPD</i>         | 2.749  | 11.720  | 0.235 | 0.035 |
| <i>NR4A1</i>         | 31.531 | 132.936 | 0.237 | 0.000 |
| <i>RP11-1100L3.8</i> | 26.887 | 113.032 | 0.238 | 0.000 |
| <i>CTD-2562J17.7</i> | 11.044 | 46.326  | 0.238 | 0.000 |
| <i>DAPK1</i>         | 6.570  | 26.883  | 0.244 | 0.001 |
| <i>GDF15</i>         | 16.248 | 65.246  | 0.249 | 0.000 |
| <i>LTBP1</i>         | 6.097  | 24.315  | 0.251 | 0.002 |
| <i>NR4A3</i>         | 5.657  | 22.510  | 0.251 | 0.002 |
| <i>ABCA8</i>         | 5.723  | 22.212  | 0.258 | 0.002 |
| <i>RASD1</i>         | 5.775  | 22.380  | 0.258 | 0.002 |
| <i>GPCPD1</i>        | 6.089  | 22.847  | 0.266 | 0.005 |
| <i>TFPI2</i>         | 24.744 | 92.689  | 0.267 | 0.000 |
| <i>RP11-4K16.2</i>   | 8.444  | 31.537  | 0.268 | 0.000 |
| <i>RCN3</i>          | 2.991  | 11.114  | 0.269 | 0.035 |
| <i>FAM107B</i>       | 27.121 | 100.358 | 0.270 | 0.000 |
| <i>AL161784.1</i>    | 94.556 | 348.118 | 0.272 | 0.000 |
| <i>RP11-499O7.7</i>  | 10.257 | 37.631  | 0.273 | 0.000 |
| <i>RP11-806O11.1</i> | 4.113  | 14.915  | 0.276 | 0.041 |
| <i>A2M</i>           | 3.447  | 12.228  | 0.282 | 0.049 |
| <i>CFI</i>           | 6.503  | 22.925  | 0.284 | 0.005 |
| <i>RNU4ATAC</i>      | 9.632  | 33.010  | 0.292 | 0.000 |
| <i>ARRB1</i>         | 10.261 | 35.160  | 0.292 | 0.000 |
| <i>PEG10</i>         | 22.727 | 76.641  | 0.297 | 0.000 |
| <i>ITPRI</i>         | 5.323  | 17.635  | 0.302 | 0.023 |

(Table S5 continued)

|                      |         |         |       |       |
|----------------------|---------|---------|-------|-------|
| <i>LPGAT1</i>        | 62.104  | 199.617 | 0.311 | 0.000 |
| <i>SLC45A4</i>       | 12.221  | 38.934  | 0.314 | 0.000 |
| <i>ZNF275</i>        | 5.888   | 18.544  | 0.318 | 0.015 |
| <i>FGL1</i>          | 4.736   | 14.871  | 0.318 | 0.041 |
| <i>SLC6A16</i>       | 6.873   | 20.658  | 0.333 | 0.013 |
| <i>AL353354.1</i>    | 246.164 | 723.097 | 0.340 | 0.000 |
| <i>CPM</i>           | 87.969  | 258.231 | 0.341 | 0.000 |
| <i>GSTA4</i>         | 6.561   | 19.153  | 0.343 | 0.019 |
| <i>NAPSA</i>         | 24.679  | 71.080  | 0.347 | 0.000 |
| <i>APOC1</i>         | 17.350  | 49.624  | 0.350 | 0.000 |
| <i>FAM69B</i>        | 7.505   | 21.403  | 0.351 | 0.016 |
| <i>PDK4</i>          | 19.506  | 55.597  | 0.351 | 0.000 |
| <i>CNTN1</i>         | 5.809   | 16.389  | 0.354 | 0.035 |
| <i>ASS1</i>          | 19.596  | 54.839  | 0.357 | 0.000 |
| <i>GALNT11</i>       | 37.995  | 106.067 | 0.358 | 0.000 |
| <i>CTD-2562J17.9</i> | 24.206  | 66.424  | 0.364 | 0.000 |
| <i>ZNF189</i>        | 7.936   | 21.621  | 0.367 | 0.016 |
| <i>CCND3</i>         | 26.170  | 70.215  | 0.373 | 0.000 |
| <i>FOS</i>           | 7.952   | 21.252  | 0.374 | 0.016 |
| <i>FKBP10</i>        | 11.586  | 30.606  | 0.379 | 0.005 |
| <i>APOE</i>          | 15.420  | 40.500  | 0.381 | 0.001 |
| <i>RHOBTB2</i>       | 31.149  | 81.775  | 0.381 | 0.000 |
| <i>CTXN1</i>         | 9.717   | 25.394  | 0.383 | 0.011 |
| <i>STAMBPL1</i>      | 15.706  | 41.038  | 0.383 | 0.001 |
| <i>AKR1C2</i>        | 233.297 | 606.520 | 0.385 | 0.000 |
| <i>DUSP4</i>         | 24.131  | 60.938  | 0.396 | 0.000 |
| <i>Sep11</i>         | 49.940  | 125.765 | 0.397 | 0.000 |
| <i>ENDOD1</i>        | 10.731  | 26.761  | 0.401 | 0.014 |
| <i>EDIL3</i>         | 27.967  | 69.116  | 0.405 | 0.000 |
| <i>LAMA1</i>         | 7.708   | 19.036  | 0.405 | 0.036 |
| <i>MEGF9</i>         | 62.134  | 153.112 | 0.406 | 0.000 |
| <i>OLFM2</i>         | 15.330  | 37.692  | 0.407 | 0.004 |
| <i>MAPK4</i>         | 16.892  | 41.430  | 0.408 | 0.002 |
| <i>GPX2</i>          | 149.142 | 365.662 | 0.408 | 0.000 |
| <i>CD46</i>          | 295.889 | 724.847 | 0.408 | 0.000 |
| <i>NAB2</i>          | 10.969  | 26.816  | 0.409 | 0.014 |
| <i>RP11-304L19.5</i> | 87.330  | 208.535 | 0.419 | 0.000 |
| <i>NBEAL2</i>        | 32.145  | 76.735  | 0.419 | 0.000 |
| <i>EMP2</i>          | 14.283  | 34.066  | 0.419 | 0.007 |

*(Table S5 continued)*

|                     |         |         |       |       |
|---------------------|---------|---------|-------|-------|
| <i>XBPI</i>         | 110.761 | 263.476 | 0.420 | 0.000 |
| <i>DKK1</i>         | 43.967  | 102.387 | 0.429 | 0.000 |
| <i>GULP1</i>        | 14.946  | 34.654  | 0.431 | 0.007 |
| <i>EGFL7</i>        | 10.181  | 23.595  | 0.432 | 0.041 |
| <i>RP11-27M24.1</i> | 19.403  | 44.919  | 0.432 | 0.003 |
| <i>F3</i>           | 56.690  | 130.804 | 0.433 | 0.000 |
| <i>STOM</i>         | 25.135  | 57.792  | 0.435 | 0.001 |
| <i>AKRIC1</i>       | 124.369 | 285.455 | 0.436 | 0.000 |
| <i>JUP</i>          | 65.017  | 148.466 | 0.438 | 0.000 |
| <i>AGPAT2</i>       | 52.204  | 118.962 | 0.439 | 0.000 |
| <i>DNAJC12</i>      | 42.262  | 94.179  | 0.449 | 0.000 |
| <i>IRX3</i>         | 19.344  | 43.011  | 0.450 | 0.004 |
| <i>AL591806.1</i>   | 13.187  | 29.296  | 0.450 | 0.023 |
| <i>MDM2</i>         | 28.941  | 64.070  | 0.452 | 0.000 |
| <i>CRIP2</i>        | 13.388  | 29.577  | 0.453 | 0.023 |
| <i>CTD-3149D2.4</i> | 19.714  | 43.333  | 0.455 | 0.004 |
| <i>EPB41L5</i>      | 11.930  | 26.184  | 0.456 | 0.024 |
| <i>PCSK6</i>        | 11.796  | 25.877  | 0.456 | 0.034 |
| <i>CADM1</i>        | 17.329  | 37.302  | 0.465 | 0.010 |
| <i>LPIN2</i>        | 13.024  | 27.739  | 0.470 | 0.044 |
| <i>GNG11</i>        | 23.251  | 49.492  | 0.470 | 0.003 |
| <i>RDH10</i>        | 34.193  | 72.723  | 0.470 | 0.000 |
| <i>PDE4D</i>        | 37.305  | 79.240  | 0.471 | 0.000 |
| <i>DPP7</i>         | 28.479  | 58.734  | 0.485 | 0.002 |
| <i>IQCJ-SCHIP1</i>  | 22.400  | 46.025  | 0.487 | 0.006 |
| <i>IMPA2</i>        | 73.605  | 149.225 | 0.493 | 0.000 |
| <i>TEAD2</i>        | 13.572  | 27.286  | 0.497 | 0.044 |
| <i>ERRF11</i>       | 92.874  | 186.249 | 0.499 | 0.000 |
| <i>EMC10</i>        | 88.397  | 176.966 | 0.500 | 0.000 |
| <i>AKRIC3</i>       | 89.255  | 177.248 | 0.504 | 0.000 |
| <i>SFTA3</i>        | 20.505  | 40.426  | 0.507 | 0.015 |
| <i>SPTSSA</i>       | 103.778 | 204.517 | 0.507 | 0.000 |
| <i>FGG</i>          | 245.031 | 481.888 | 0.508 | 0.000 |
| <i>PLEKHG2</i>      | 35.492  | 69.675  | 0.509 | 0.001 |
| <i>MDK</i>          | 25.246  | 49.252  | 0.513 | 0.008 |
| <i>ISYNA1</i>       | 17.318  | 33.625  | 0.515 | 0.037 |
| <i>FGA</i>          | 132.994 | 257.660 | 0.516 | 0.000 |
| <i>PRPS2</i>        | 21.377  | 41.301  | 0.518 | 0.017 |
| <i>KITLG</i>        | 15.921  | 30.738  | 0.518 | 0.040 |

(Table S5 continued)

|                     |         |         |       |       |
|---------------------|---------|---------|-------|-------|
| <i>PFKFB3</i>       | 21.095  | 40.620  | 0.519 | 0.023 |
| <i>SEMA4B</i>       | 61.826  | 119.012 | 0.519 | 0.000 |
| <i>FBXW2</i>        | 40.619  | 78.095  | 0.520 | 0.001 |
| <i>IFI30</i>        | 24.162  | 46.281  | 0.522 | 0.013 |
| <i>TM4SF1</i>       | 227.583 | 435.876 | 0.522 | 0.000 |
| <i>WDR34</i>        | 34.900  | 66.227  | 0.527 | 0.002 |
| <i>RBM47</i>        | 14.973  | 28.403  | 0.527 | 0.049 |
| <i>AKAP12</i>       | 24.426  | 46.303  | 0.528 | 0.013 |
| <i>SLC9A3R1</i>     | 21.400  | 40.386  | 0.530 | 0.023 |
| <i>IGFBP3</i>       | 112.198 | 210.966 | 0.532 | 0.000 |
| <i>SLC26A2</i>      | 17.314  | 32.488  | 0.533 | 0.049 |
| <i>LIMCH1</i>       | 51.693  | 96.180  | 0.537 | 0.000 |
| <i>CTSL1</i>        | 49.462  | 90.812  | 0.545 | 0.001 |
| <i>INO80C</i>       | 21.667  | 39.715  | 0.546 | 0.030 |
| <i>ATP11A</i>       | 18.818  | 34.202  | 0.550 | 0.040 |
| <i>MALL</i>         | 28.477  | 51.684  | 0.551 | 0.014 |
| <i>RP11-638I2.6</i> | 33.471  | 60.583  | 0.552 | 0.007 |
| <i>CTC-273B12.8</i> | 27.066  | 48.783  | 0.555 | 0.022 |
| <i>SLC25A29</i>     | 26.907  | 48.148  | 0.559 | 0.016 |
| <i>SGPP1</i>        | 33.575  | 59.995  | 0.560 | 0.010 |
| <i>TP53INP2</i>     | 28.309  | 50.421  | 0.561 | 0.018 |
| <i>HEATR5A</i>      | 68.859  | 122.476 | 0.562 | 0.000 |
| <i>BTG1</i>         | 55.059  | 97.920  | 0.562 | 0.001 |
| <i>SCD5</i>         | 37.838  | 67.263  | 0.563 | 0.005 |
| <i>IDH2</i>         | 38.598  | 68.599  | 0.563 | 0.005 |
| <i>HMGB3</i>        | 158.178 | 277.969 | 0.569 | 0.000 |
| <i>FURIN</i>        | 26.514  | 46.307  | 0.573 | 0.027 |
| <i>CRLS1</i>        | 32.763  | 57.024  | 0.575 | 0.012 |
| <i>INO80E</i>       | 32.124  | 55.760  | 0.576 | 0.019 |
| <i>ALDH3B1</i>      | 38.755  | 67.195  | 0.577 | 0.007 |
| <i>PRRC2B</i>       | 41.436  | 71.522  | 0.579 | 0.006 |
| <i>LAPTM4B</i>      | 156.309 | 268.598 | 0.582 | 0.000 |
| <i>EDEM1</i>        | 29.828  | 51.217  | 0.582 | 0.020 |
| <i>EPDR1</i>        | 61.710  | 105.920 | 0.583 | 0.001 |
| <i>EPAS1</i>        | 80.919  | 138.268 | 0.585 | 0.000 |
| <i>CD320</i>        | 35.655  | 60.907  | 0.585 | 0.014 |
| <i>UGDH</i>         | 139.882 | 238.134 | 0.587 | 0.000 |
| <i>CEBPD</i>        | 30.012  | 50.888  | 0.590 | 0.035 |
| <i>P2RY6</i>        | 25.836  | 43.714  | 0.591 | 0.042 |



(Table S5 continued)

|                     |         |         |       |       |
|---------------------|---------|---------|-------|-------|
| <i>CITED2</i>       | 69.423  | 116.995 | 0.593 | 0.001 |
| <i>ANXA4</i>        | 92.587  | 155.869 | 0.594 | 0.000 |
| <i>NOL6</i>         | 31.210  | 52.424  | 0.595 | 0.030 |
| <i>HDGFRP2</i>      | 29.748  | 49.436  | 0.602 | 0.033 |
| <i>B4GALNT1</i>     | 30.800  | 51.046  | 0.603 | 0.028 |
| <i>TXNIP</i>        | 27.967  | 45.530  | 0.614 | 0.048 |
| <i>ITGB5</i>        | 46.821  | 75.826  | 0.617 | 0.011 |
| <i>SMARCA1</i>      | 31.641  | 51.137  | 0.619 | 0.038 |
| <i>SMIM4</i>        | 65.855  | 106.242 | 0.620 | 0.002 |
| <i>NDRG1</i>        | 78.796  | 126.427 | 0.623 | 0.001 |
| <i>BSCL2</i>        | 33.964  | 54.487  | 0.623 | 0.034 |
| <i>NME4</i>         | 60.980  | 97.743  | 0.624 | 0.004 |
| <i>NT5DC2</i>       | 48.612  | 77.676  | 0.626 | 0.013 |
| <i>GPR107</i>       | 38.222  | 60.957  | 0.627 | 0.035 |
| <i>ICAM1</i>        | 96.112  | 153.157 | 0.628 | 0.000 |
| <i>MUC1</i>         | 53.793  | 85.607  | 0.628 | 0.009 |
| <i>RP11-78A19.3</i> | 230.881 | 367.308 | 0.629 | 0.000 |
| <i>TMEM64</i>       | 36.086  | 57.061  | 0.632 | 0.040 |
| <i>BCAM</i>         | 37.332  | 59.019  | 0.633 | 0.034 |
| <i>STARD10</i>      | 42.079  | 66.432  | 0.633 | 0.028 |
| <i>CRABP2</i>       | 31.946  | 50.292  | 0.635 | 0.048 |
| <i>ECT2</i>         | 48.138  | 75.419  | 0.638 | 0.020 |
| <i>EPCAM</i>        | 144.405 | 225.627 | 0.640 | 0.000 |
| <i>RP11-329L6.1</i> | 159.378 | 248.555 | 0.641 | 0.000 |
| <i>ATP6V1G1</i>     | 112.074 | 174.143 | 0.644 | 0.000 |
| <i>SLC39A7</i>      | 59.108  | 91.571  | 0.645 | 0.012 |
| <i>TXN</i>          | 296.597 | 458.994 | 0.646 | 0.000 |
| <i>SLC6A6</i>       | 95.011  | 146.778 | 0.647 | 0.002 |
| <i>CSGALNACT1</i>   | 38.432  | 59.336  | 0.648 | 0.044 |
| <i>CRNDE</i>        | 90.021  | 138.968 | 0.648 | 0.002 |
| <i>CMPK1</i>        | 77.824  | 119.735 | 0.650 | 0.004 |
| <i>GAA</i>          | 38.875  | 59.777  | 0.650 | 0.044 |
| <i>CYBA</i>         | 46.944  | 71.981  | 0.652 | 0.028 |
| <i>SLPI</i>         | 79.611  | 121.496 | 0.655 | 0.004 |
| <i>SLC25A36</i>     | 46.278  | 70.593  | 0.656 | 0.034 |
| <i>AC002117.1</i>   | 48.634  | 74.115  | 0.656 | 0.025 |
| <i>MBTPS1</i>       | 52.258  | 79.592  | 0.657 | 0.024 |
| <i>RABL6</i>        | 41.800  | 63.182  | 0.662 | 0.041 |
| <i>FADS1</i>        | 54.396  | 82.028  | 0.663 | 0.021 |

(Table S5 continued)

|             |         |         |       |       |
|-------------|---------|---------|-------|-------|
| <i>WSBI</i> | 128.679 | 193.424 | 0.665 | 0.000 |
| <i>PGD</i>  | 88.971  | 133.357 | 0.667 | 0.004 |

---

Note:

1. FPKM, fragment per kilobase of exon model per million mapped reads.
2. Genes are listed according to their fold changes from high to low for those with upregulation and from high to low for those with downregulation.

Table S6. Enriched process networks, as analyzed by MetaCore with differentially expressed genes identified in RNA-Seq from KLF5-expressing DU 145 xenograft tumors and the PLHCX vector control. Different processes with the same function are bracketed together, ranked based on *p* value (from low to high). Genes contributing to a process are listed alphabetically.

| <b>Function</b>     | <b>Process</b>                         | <b><i>p</i> value</b> | <b>Genes</b>                    | <b>Number</b> |
|---------------------|----------------------------------------|-----------------------|---------------------------------|---------------|
| Protein folding     | Response to unfolded proteins          | 1.512e-3              | HSP70, HSPA1A, HSPA1B           | 3             |
|                     | Folding in normal condition            | 7.077e-3              | HSP70, HSPA1A, HSPA1B           | 3             |
|                     | Protein folding nucleus                | 1.596e-2              | HSP70, HSPA1B                   | 2             |
| Signal transduction | Leptin signaling                       | 5.131e-3              | A2M, T-A2MG, VEGF-A             | 3             |
| Reproduction        | FSH-beta signaling pathway             | 1.582e-2              | Beta-arrestin1, CGalpha, VEGF-A | 3             |
| Proliferation       | Positive regulation cell proliferation | 3.668e-2              | Beta-arrestin1, MDM2, VEGF-A    | 3             |
| Development         | Blood vessel morphogenesis             | 3.968e-2              | F263, KLF5, VEGF-A              | 3             |
| Immune response     | Th17-derived cytokines                 | 4.231e-2              | Calgranulin A, Calgranulin B    | 2             |
|                     | Phagosome in antigen presentation      | 4.653e-2              | A2M, HSP70, SEC15L              | 3             |

Table S7. Enriched process networks, as analyzed by MetaCore with differentially expressed genes identified in RNA-Seq from K369R-expressing DU 145 xenograft tumors and the PLHCX vector control. Different processes with the same function are bracketed together, ranked based on *p* value (from low to high). Genes contributing to a process are listed alphabetically.

| <b>Function</b> | <b>Process</b>                                             | <b><i>p</i> value</b> | <b>Genes</b>                                                                                                                                                                                                                                      | <b>Number</b> |
|-----------------|------------------------------------------------------------|-----------------------|---------------------------------------------------------------------------------------------------------------------------------------------------------------------------------------------------------------------------------------------------|---------------|
| Development     | Skeletal muscle development                                | 1.498e-8              | ACTA1, ACTA2, Alpha crystallin B, Collagen IV, Desmin, Filamin C, G-protein alpha-i2, MAP-1B, MRLC, MYH4, MYRL2, Nebulin, Smooth muscle myosin, Tropomyosin, Tropomyosin-1, Troponin C, skeletal muscle, Troponin I, fast skeletal muscle, VEGF-A | 20            |
|                 | EMT_<br>Regulation of epithelial-to-mesenchymal transition | 2.172e-2              | ACTA2, Actin, c-Jun, Claudin-1, Claudin-2, Desmin, FGFR1, G-protein alpha-i family, HGF receptor (Met), I-kB, LOXL2, Occludin, PAI1, Tropomyosin-1, Vimentin                                                                                      | 15            |
| Cell adhesion   | Cell-matrix interactions                                   | 3.863e-7              | ADAM9, BETA-IG-H3, CD44, COL4A1, COL4A2, Collagen XIV, Connexin 43, ECM1, Fibulin-1, Fibulin-3, Galectin-1, ITGB4, LAMA3 (Epiligrin), LAMB3, LAMC2, MMP-24, Perlecan, Tenascin-C, Thrombospondin 1, TIMP2                                         | 20            |
|                 | Integrin-mediated                                          | 1.889e-5              | Actin, c-Jun, Caveolin-1, Caveolin-2, Collagen IV,                                                                                                                                                                                                | 21            |

|                   |                                             |          |                                                                                                                                                                           |    |
|-------------------|---------------------------------------------|----------|---------------------------------------------------------------------------------------------------------------------------------------------------------------------------|----|
|                   | cell-matrix adhesion                        |          | Collagen XIV, Cyr61, Filamin C, Galectin-1, ITGB4, LAMA4, Laminin 5, MRLC, MyHC, Osteonectin, Paxillin, Tenascin-C, Tetraspanin-8, TGM2, Tubulin alpha, Zyxin             |    |
|                   | Cell junctions                              | 2.503e-3 | Actin, BPAG1, Caveolin-1, Claudin-1, Claudin-2, Connexin 43, Desmoglein 2, Keratin 6A, M-cadherin, Occludin, Paxillin, Plakoglobin, Tubulin alpha, Vimentin, ZO-2         | 15 |
|                   | Platelet-endothelium-leucocyte interactions | 1.168e-2 | CD44, CD68, Collagen IV, Cyr61, HGF receptor (Met), I-kB, ICAM1, IL-18, Occludin, PAI1, TFPI-2, Thrombospondin 1, VEGF-A                                                  | 13 |
| Inflammation<br>– | Innate inflammatory response                | 1.084e-6 | Beta-defensin 1, c-Jun, C3, C5, C5 convertase (C3bBb), Factor I, G-protein alpha-i family, I-kB, IL-18, IP3 receptor, NFKBIA, PLUNC, RIPK2, SP-A, SP-B, Tissue factor     | 16 |
|                   | Complement system                           | 6.492e-6 | C3, C5, C5 convertase (C3bBb), Factor B, Factor I, iC3b, MCP                                                                                                              | 7  |
|                   | Kallikrein-kinin system                     | 6.152e-5 | A2M, Alpha 1-antitrypsin, AP-1, C3, C5, Carboxypeptidase M, Coagulation factor XIII, Fibrinogen alpha, Fibrinogen gamma, G-protein alpha-i family, G-protein gamma, I-kB, | 17 |

|                    |                                                     |          |                                                                                                                                                                                                                                                                                                           |    |
|--------------------|-----------------------------------------------------|----------|-----------------------------------------------------------------------------------------------------------------------------------------------------------------------------------------------------------------------------------------------------------------------------------------------------------|----|
|                    |                                                     |          | IP3 receptor, NFKBIA, PAI1, T-A2MG, Tissue factor                                                                                                                                                                                                                                                         |    |
|                    | Amphoterin signaling                                | 8.662e-3 | Actin, c-Jun, Calgranulin A, I-kB, ICAM1, MRLC, MyHC, NFKBIA, PAI1                                                                                                                                                                                                                                        | 9  |
|                    | IL-6 signaling                                      | 9.208e-3 | A2M, Alpha 1-antitrypsin, c-Jun, C/EBP, C3, Fibrinogen alpha, Fibrinogen gamma, I-kB, TATI                                                                                                                                                                                                                | 9  |
|                    | Protein C signaling                                 | 3.221e-2 | Actin, c-Jun, G-protein alpha-i family, Galpha(i)-specific EDG GPCRs, I-kB, IP3 receptor, NFKBIA, PAI1, Tissue factor                                                                                                                                                                                     | 9  |
| Muscle contraction |                                                     | 1.848e-6 | ACTA1, ACTA2, Alpha crystallin B, Ca-ATPase1, Connexin 43, Desmin, G-protein alpha-i family, MaxiK alpha subunit, MRLC, MYH4, MYRL2, Smooth muscle myosin, Syntrophin B, Thrombospondin 1, Tropomyosin, Tropomyosin-1, Troponin C, cardiac, Troponin C, skeletal muscle, Troponin I, fast skeletal muscle | 22 |
|                    | Nitric oxide signaling in the cardiovascular system | 3.163e-2 | c-Jun, Ca-ATPase1, Caveolin-1, EPAS1, ETS2, G-protein alpha-i family, IP3 receptor, KLF2, VEGF-A                                                                                                                                                                                                          | 9  |
| Cytoskeleton       | Actin filaments                                     | 2.474e-6 | ACTA1, ARPC1, Band 4.1-like protein 2, BPAG1, Brush border myosin I, CD44, Filamin C, MRLC, MYH4, MYH9, Myosin I,                                                                                                                                                                                         | 18 |

|                      |                                                |          |                                                                                                                                                                                                                                                  |    |
|----------------------|------------------------------------------------|----------|--------------------------------------------------------------------------------------------------------------------------------------------------------------------------------------------------------------------------------------------------|----|
|                      |                                                |          | Nebulin, Paxillin,<br>Tropomyosin,<br>Tropomyosin-1, Troponin<br>I, fast skeletal muscle,<br>Zyxin                                                                                                                                               |    |
|                      | Regulation of<br>cytoskeleton<br>rearrangement | 5.267e-5 | ACTA1, ARPC1, Band<br>4.1-like protein 2, BPAG1,<br>CD44, Desmin, ECT2,<br>Filamin C, G-protein<br>alpha-i family, MRLC,<br>MYH4, Nebulin, Paxillin,<br>Tubulin alpha, Vimentin,<br>Zyxin                                                        | 16 |
|                      | Intermediate<br>filaments                      | 5.560e-3 | Actin, BPAG1, Desmin,<br>Keratin 19, Keratin 6A,<br>Nesprin 1, Tubulin alpha,<br>Vimentin                                                                                                                                                        | 8  |
| Blood<br>coagulation |                                                | 1.047e-4 | A2M, Alpha 1-antitrypsin,<br>Annexin IV, Caveolin-1,<br>Coagulation factor XIII A,<br>Collagen IV, Fibrinogen<br>alpha, Fibrinogen gamma,<br>Galpha(q)-specific<br>nucleotide-like GPCRs,<br>PAI1, TFPI-2,<br>Thrombospondin 1, Tissue<br>factor | 13 |
| Proteolysis          | ECM<br>remodeling                              | 1.579e-4 | Alpha 1-antitrypsin,<br>Antileukoproteinase<br>1, Collagen IV, Collagen<br>XIV, Laminin 5, MMP-24,<br>Osteonectin, PACE4,<br>PAI1, Tenascin-C, TIMP2,<br>TFPI-2                                                                                  | 12 |
|                      | Connective<br>tissue<br>degradation            | 3.303e-3 | ADAM9, Alpha<br>1-antitrypsin,<br>Antileukoproteinase 1,<br>Collagen IV, Furin,<br>Laminin 5, MMP-24,<br>PACE4, PAI1, Tenascin-C,<br>TFPI-2, TIMP2                                                                                               | 12 |

|                                          |                                        |          |                                                                                                                                                           |    |
|------------------------------------------|----------------------------------------|----------|-----------------------------------------------------------------------------------------------------------------------------------------------------------|----|
| Reproduction                             | FSH-beta signaling pathway             | 2.216e-3 | BTG1, c-Jun, CG alpha, Cyclin D, FSRP, G-protein alpha-i family, IBP, IBP3, IP3 receptor, NFKBIA, PP2A structural, PP2A structural, Tob1, VEGF-A          | 14 |
|                                          | Feeding and Neurohormone signaling     | 2.585e-2 | ADAM9, AKR1C1, Antileukoproteinase 1, c-Jun, CD44, Cyclin D3, G-protein alpha-i family, HSP27, IBP3, PAI1, Paxillin, PP2A structural, PSG2, Stathmin, VGF | 15 |
| Apoptosis                                | Endoplasmic reticulum stress pathway   | 8.839e-3 | c-Jun, C/EBP zeta, HERP, I-kB, IP3R1, NOXA, NUR77, S1P, XBP1                                                                                              | 9  |
| Immune response                          | Phagocytosis                           | 9.278e-3 | Actin, APOE, c-Jun, C/EBP, C3, I-kB, iC3b, IL-15RA, IP3 receptor, MRLC, MyHC, Myosin I, NFKBIA, p22-phox, Paxillin                                        | 15 |
| Response to hypoxia and oxidative stress |                                        | 1.585e-2 | AHR, AP-1, Chk2, Gamma-glutamyltranspeptidase, Glutaredoxin, GPX1, GPX2, GSTT1, HIF-prolyl hydroxylase, Oxidized thioredoxin, SP-A                        | 11 |
| Proliferation                            | Positive regulation cell proliferation | 3.689e-2 | Basonuclin, c-Jun, Dexas1, FGFR1, G-protein alpha-i family, HGF receptor (Met), LIF, LMO1, MRLC, TACSTD2 (TROP2), Tob1, VEGF-A                            | 13 |

---



Table S8. Enriched process networks, as analyzed by MetaCore with differentially expressed genes identified in RNA-Seq from xenografts expressing K369R and KLF5. Different processes with the same function are bracketed together, ranked based on *p* value (from low to high). Genes contributing to a process are listed alphabetically. Process highlighted by bold font means the same process enriched by comparing K369R and PLHCX.

| <b>Function</b> | <b>Process</b>                                  | <b><i>p</i> value</b> | <b>Genes</b>                                                                                                                                                                                                                                                                 | <b>Number</b> |
|-----------------|-------------------------------------------------|-----------------------|------------------------------------------------------------------------------------------------------------------------------------------------------------------------------------------------------------------------------------------------------------------------------|---------------|
| Cytoskeleton    | <b>Actin filaments</b>                          | 7.134e-10             | ACTA1, Alpha-actinin, ARPC1, Band 4.1-like protein 2, Beta TnTF, BPAG1, Brush border myosin I, CD44, Filamin C, MRLC, MYH4, MYH9, MyHC, Myosin I, Nebulin, Paxillin, Tropomyosin, Tropomyosin-1, Tropomyosin-2, Troponin I, fast skeletal muscle, Troponin T, cardiac, Zyxin | 24            |
|                 | <b>Regulation of cytoskeleton rearrangement</b> | 8.066e-6              | ACTA1, Alpha-actinin, ARPC1, Band 4.1-like protein 2, BPAG1, CD44, Desmin, ECT2, Filamin C, MRLC, MYH4, MyHC, Nebulin, Paxillin, Tubulin alpha, Vimentin, Zyxin                                                                                                              | 17            |
|                 | <b>Intermediate filaments</b>                   | 6.336e-5              | Actin, Alpha-actinin, BPAG1, Desmin, Keratin 19, Keratin 6A, Keratin 6C, Keratin 7, Nesprin 1, Tubulin alpha, Vimentin                                                                                                                                                       | 11            |
| Cell adhesion   | <b>Cell-matrix interactions</b>                 | 4.010e-8              | ADAM9, BCAM, BETA-IG-H3, CD44, COL4A1, COL4A2, Collagen XIV, ECM1, Fibulin-3, Galectin-1, ITGB4, ITGB5, LAMA1, LAMA3 (Epiligrin), LAMB3, Laminin 5, MMP-24, Perlecan, SP-D, Tenascin-C, TIMP2                                                                                | 21            |

|             |                                                                |          |                                                                                                                                                                                                                                                                              |    |
|-------------|----------------------------------------------------------------|----------|------------------------------------------------------------------------------------------------------------------------------------------------------------------------------------------------------------------------------------------------------------------------------|----|
|             | <b>Integrin-mediated cell-matrix adhesion</b>                  | 2.084e-7 | Actin, Alpha-actinin,c-Jun, Caveolin-1, Caveolin-2, Collagen IV, Collagen XIV, Cyr61, Filamin C, Galectin-1, ITGB4, ITGB5, LAMA4, Laminin 5, MRLC, MyHC, Osteonectin, Paxillin, Tenascin-C, Tetraspanin-8, TGM2, Tubulin alpha, Zyxin                                        | 23 |
|             | <b>Cell junctions</b>                                          | 4.284e-3 | Actin, Alpha-actinin, BPAG1, Caveolin-1, Claudin-1, Claudin-2, Desmoglein 2, Keratin 6A, M-cadherin, Paxillin, Plakoglobin, Tubulin alpha, Vimentin                                                                                                                          | 13 |
|             | <b>Cadherins</b>                                               | 4.902e-2 | Actin, Alpha-actinin, BPAG1, Desmoglein 2, DKK1, FHL2, HGF receptor (Met), M-cadherin, P-cadherin, Plakoglobin, PTPRF (LAR)                                                                                                                                                  | 11 |
| Development | <b>Skeletal muscle development</b>                             | 3.141e-8 | ACTA1, Alpha crystallin B, Beta TnTF, Collagen IV, Desmin, Filamin C, HGF receptor (Met), MAP-1B, MRLC, MYH4, MyHC, MYRL2, Nebulin, Smooth muscle myosin, Tropomyosin, Tropomyosin-1, Tropomyosin-2, Troponin C, skeletal muscle troponin I, fast skeletal muscle troponin T | 20 |
|             | <b>EMT_ Regulation of epithelial-to-mesenchymal transition</b> | 2.993e-2 | Actin, c-Jun, c-Fos,Claudin-1, Claudin-2, Desmin, FGFR1, HGF receptor (Met), LOXL2, MUC1, PAI1, Tropomyosin-1,                                                                                                                                                               | 13 |

|                           |                                      |          |                                                                                                                                                                                                                                                     |    |
|---------------------------|--------------------------------------|----------|-----------------------------------------------------------------------------------------------------------------------------------------------------------------------------------------------------------------------------------------------------|----|
|                           |                                      |          | Vimentin                                                                                                                                                                                                                                            |    |
| <b>Muscle contraction</b> |                                      | 2.120e-7 | ACTA1, Alpha crystallin B, Alpha-actinin, Beta TnTF, Ca-ATPase1, Calponin-3, Desmin, MRLC, MYH4, MyHC, MYRL2, nAChR beta, Smooth muscle myosin, Tropomyosin, Tropomyosin-1, Troponin C, skeletal muscle troponin I, fast skeletal muscle troponin T | 18 |
| Proteolysis               | <b>ECM remodeling</b>                | 7.937e-7 | Alpha 1-antitrypsin, Antileukoproteinase 1, Collagen IV, Collagen XIV, Laminin 5, MMP-24, MTCBP-1, Osteonectin, PACE4, PAI1, PLAU (UPA), PLAUR (uPAR), Tenascin-C, TIMP2, TFPI-2                                                                    | 15 |
|                           | <b>Connective tissue degradation</b> | 3.164e-6 | ADAM9, Alpha 1-antitrypsin, Antileukoproteinase 1, Collagen IV, EDEM, Furin, ITGB5, Laminin 5, MMP-24, MTCBP-1, PACE4, PAI1, PLAU (UPA), PLAUR (uPAR), Tenascin-C, TFPI-2, TIMP2                                                                    | 17 |
| Inflammation              | <b>Kallikrein-kinin system</b>       | 1.024e-4 | A2M, Alpha 1-antitrypsin, AP-1, c-Fos, C5, Carboxypeptidase M, Coagulation factor XIII, Fibrinogen alpha, Fibrinogen gamma, G-protein gamma, IP3 receptor, PAI1, PLAU (UPA), PLAUR (uPAR), T-A2MG, Tissue factor                                    | 16 |
|                           | <b>IL-6 signaling</b>                | 1.767e-2 | A2M, Alpha 1-antitrypsin,                                                                                                                                                                                                                           | 8  |

|                          |                                             |          |                                                                                                                                                                                                                               |    |
|--------------------------|---------------------------------------------|----------|-------------------------------------------------------------------------------------------------------------------------------------------------------------------------------------------------------------------------------|----|
|                          |                                             |          | c-Fos, c-Jun, C/EBP, Fibrinogen alpha, Fibrinogen gamma, TATI                                                                                                                                                                 |    |
|                          | <b>Amphoterin signaling</b>                 | 1.674e-2 | Actin, c-Jun, Calgranulin B, ICAM1, MRLC, MyHC, PAI1                                                                                                                                                                          | 7  |
|                          | <b>Protein C signaling</b>                  | 2.496e-2 | Actin, Alpha-actinin, c-Jun, Galpha(i)-specific EDG GPCRs, IP3 receptor, PAI1, PLAU (UPA), Tissue factor                                                                                                                      | 8  |
|                          | <b>Innate inflammatory response</b>         | 2.466e-2 | Beta-defensin 1, c-Jun, C5, Factor I, HSPA1A, I-kB, IL-18, IP3 receptor, SP-B, SP-D, Tissue factor                                                                                                                            | 11 |
| <b>Blood coagulation</b> |                                             | 1.461e-5 | A2M, Alpha 1-antitrypsin, Annexin IV, Caveolin-1, Coagulation factor XIII A, Collagen IV, Fibrinogen alpha, Fibrinogen gamma, Galpha(q)-specific nucleotide-like GPCRs, PAI1, PLAU (UPA), PLAUR (uPAR), TFPI-2, Tissue factor | 14 |
| Apoptosis                | <b>Endoplasmic reticulum stress pathway</b> | 1.975e-3 | c-Jun, C/EBP zeta, EDEM, HERP, IP3R1, NOXA, NUR77, S1P, XBP1                                                                                                                                                                  | 9  |
| Reproduction             | <b>Feeding and Neurohormone signaling</b>   | 1.461e-3 | ADAM9, AKR1C1, Antileukoproteinase 1, c-Fos, c-Jun, CD44, Cyclin D3, HSP27, HSP70, IBP3, IL-11, Lyn, MGF, MUC1, PAI1, Paxillin, PSG2, VGF                                                                                     | 18 |
|                          | <b>FSH-beta signaling pathway</b>           | 2.247e-2 | Beta-arrestin1, BTG1, c-Fos, c-Jun, CG alpha, Cyclin D, FSRP, IBP, IBP3, IP3 receptor, TGM2                                                                                                                                   | 11 |
|                          | Gonadotropin regulation                     | 2.364e-2 | AKR1C3, AP-1, Beta-arrestin1, c-Fos, c-Jun, CG alpha, Ionotropic glutamate                                                                                                                                                    | 12 |

|                    |                                     |          |                                                                                                                                        |    |
|--------------------|-------------------------------------|----------|----------------------------------------------------------------------------------------------------------------------------------------|----|
|                    |                                     |          | receptor, IP3 receptor,<br>MAP-1B, MKP-2,<br>NUR77, PER1                                                                               |    |
| Protein<br>folding | Response to<br>unfolded<br>proteins | 1.349e-3 | EDEM, HERP, HSP105,<br>HSP27, HSP40, HSP70,<br>XBP1                                                                                    | 7  |
| Immune<br>response | <b>Phagocytosis</b>                 | 1.310e-2 | Actin,<br>Alpha-actinin,APOE,<br>c-Fos, c-Jun, C/EBP,<br>IL-15RA, IP3 receptor,<br>Lyn, MRLC, MyHC,<br>Myosin I,<br>p22-phox, Paxillin | 14 |

---

Table S9. Significant pathway maps, as analyzed by MetaCore with differentially expressed genes identified in RNA-Seq from xenografts expressing KLF5 and PLHCX. All maps with *p* value less than 0.01 are shown, and ranked by *p* value from low to high.

| <b>Maps</b>                                                                     | <b><i>p</i> value</b> | <b>Genes</b>                  | <b>Number</b> |
|---------------------------------------------------------------------------------|-----------------------|-------------------------------|---------------|
| Role of ZNF202 in regulation of expression of genes involved in atherosclerosis | 6.887E-04             | VEGF-A,<br>CRABP2             | 2             |
| Development_Angiotensin signaling via beta-Arrestin                             | 9.795E-04             | MDM2,<br>Beta-arrestin<br>1   | 2             |
| Transcription_Role of Akt in hypoxia induced HIF1 activation                    | 1.143E-03             | VEGF-A,<br>HSP70              | 2             |
| Transcription_Role of AP-1 in regulation of cellular metabolism                 | 2.262E-03             | FXYD2, CG<br>alpha            | 2             |
| Transcription_P53 signaling pathway                                             | 2.382E-03             | VEGF-A,<br>MDM2               | 2             |
| Tissue Factor signaling in cancer via PAR1 and PAR2                             | 3.739E-03             | VEGF-A,<br>Beta-arrestin<br>1 | 2             |
| IL-6 signaling in multiple myeloma                                              | 4.045E-03             | VEGF-A,<br>MDM2               | 2             |
| PGE2 pathways in cancer                                                         | 4.690E-03             | VEGF-A,<br>Beta-arrestin<br>1 | 2             |
| Neuroprotective action of lithium                                               | 6.114E-03             | VEGF-A,<br>HSP70              | 2             |
| Fructose metabolism                                                             | 8.136E-03             | F263, ALDR                    | 2             |

Table S10. Significant pathway maps, as analyzed by MetaCore with differentially expressed genes identified in RNA-Seq from K369R-expressing DU 145 xenograft tumors and the PLHCX vector control. All maps with  $p$  value less than 0.01 are shown, and ranked by  $p$  value from low to high.

| <b>Maps</b>                                                          | <b><math>p</math> value</b> | <b>Genes</b>                                                                                                                              | <b>Number</b> |
|----------------------------------------------------------------------|-----------------------------|-------------------------------------------------------------------------------------------------------------------------------------------|---------------|
| Immune response_Alternative complement pathway                       | 1.102E-14                   | C5, C3, C5 convertase (C3bBb), Factor I, MCP, iC3b, Factor B                                                                              | 7             |
| Immune response_Lectin induced complement pathway                    | 2.794E-08                   | C5, C3, Factor I, MCP, iC3b                                                                                                               | 5             |
| Immune response_Classical complement pathway                         | 5.416E-08                   | C5, C3, Factor I, MCP, iC3b                                                                                                               | 5             |
| Cell adhesion_Chemokines and adhesion                                | 1.316E-06                   | CD44, Caveolin-2, Thrombospondin 1, VEGF-A, Actin, LAMA4, PAI1, G-protein alpha-i family, Zyxin, Paxillin, c-Jun, Caveolin-1, Collagen IV | 13            |
| Stimulation of TGF-beta signaling in lung cancer                     | 2.671E-06                   | Furin, I-kB, ACTA2, Vimentin, VEGF-A, Tropomyosin-1, Keratin 19, PAI1, Tropomyosin-2                                                      | 9             |
| Development_Regulation of epithelial-to-mesenchymal transition (EMT) | 3.080E-05                   | Occludin, HGF receptor (Met), ACTA2, Vimentin, Claudin-1, Tropomyosin-1, PAI1, FGFR1, c-Jun                                               | 9             |
| Muscle contraction_Regulation of eNOS activity in endothelial cells  | 3.497E-05                   | EPAS1, ETS2, VEGF-A, G-protein alpha-i family, KLF2, c-Jun, IP3 receptor, Caveolin-1                                                      | 8             |
| Cell adhesion_Cadherin-mediated cell adhesion                        | 3.790E-05                   | PTPRF (LAR), HGF receptor (Met), M-cadherin, Actin, P-cadherin, Plakoglobin                                                               | 6             |
| Cell adhesion_Endothelial cell contacts by junctional mechanisms     | 3.790E-05                   | Occludin, Vimentin, Claudin-1, Connexin 43, Plakoglobin, ZO-2                                                                             | 6             |
| Cell adhesion_ECM remodeling                                         | 4.411E-05                   | IBP4, CD44, TIMP2,                                                                                                                        | 8             |

|                                                                         |           |                                                                                                              |   |
|-------------------------------------------------------------------------|-----------|--------------------------------------------------------------------------------------------------------------|---|
|                                                                         |           | Laminin 5, Osteonectin, LAMA4, PAI1, Collagen IV                                                             |   |
| Blood coagulation_Blood coagulation                                     | 4.798E-05 | Tissue factor, Alpha 1-antitrypsin, A2M, Coagulation factor XIII A, Fibrinogen gamma, PAI1, Fibrinogen alpha | 7 |
| Immune response_HMGB1/RAGE signaling pathway                            | 5.083E-05 | Tissue factor, ICAM1, I-kB, Chromogranin A, PAI1, Paxillin, c-Jun                                            | 7 |
| Immune response_CCL2 signaling                                          | 5.838E-05 | ICAM1, Occludin, VEGF-A, G-protein alpha-i family, c-Jun, ZO-2, Caveolin-1                                   | 7 |
| Cell adhesion_Gap junctions                                             | 8.977E-05 | Occludin, Actin, Tubulin alpha, Connexin 43, ZO-2, Caveolin-1                                                | 6 |
| Development_TGF-beta-dependent induction of EMT via RhoA, PI3K and ILK. | 1.436E-04 | Occludin, I-kB, ACTA2, Vimentin, Claudin-1, Actin, Tropomyosin-1                                             | 7 |
| Role of Tissue factor-induced Thrombin signaling in cancerogenesis      | 2.480E-04 | Tissue factor, VEGF-A, G-protein alpha-i family, MRLC, Paxillin, c-Jun, IP3 receptor, Fibrinogen alpha       | 8 |
| Cytoskeleton remodeling_Keratin filaments                               | 2.592E-04 | Vimentin, Keratin 6A, BPAG1, Keratin 19, Tubulin alpha                                                       | 5 |
| Cell adhesion_Tight junctions                                           | 2.592E-04 | Claudin-2, Occludin, Claudin-1, Actin, ZO-2, Caveolin-1                                                      | 6 |
| Cell adhesion_Cell-matrix glycoconjugates                               | 3.522E-04 | CD44, TIMP2, CEACAM5, Tenascin-C, ECM1, Fibulin-1                                                            | 6 |
| Development_WNT signaling pathway. Part 2                               | 3.555E-04 | CD44, Vimentin, VEGF-A, Claudin-1, WIF1, c-Jun, DKK1                                                         | 7 |
| Apoptosis and survival_Endoplasmic reticulum stress response pathway    | 4.484E-04 | IP3R1, I-kB, XBP1, S1P, C/EBP zeta, c-Jun, HERP                                                              | 7 |
| Regulation of Tissue factor signaling                                   | 6.996E-04 | Tissue factor, EPAS1,                                                                                        | 4 |



|                                                                           |           |                                                                           |   |
|---------------------------------------------------------------------------|-----------|---------------------------------------------------------------------------|---|
| in cancer                                                                 |           | VEGF-A, c-Jun                                                             |   |
| Immune response_IL-1 signaling pathway                                    | 7.932E-04 | Tissue factor, I-kB, PAI1, c-Jun                                          | 4 |
| Immune response_MIF-induced cell adhesion, migration and angiogenesis     | 1.009E-03 | ICAM1, CD44, VEGF-A, G-protein alpha-i family, c-Jun                      | 5 |
| Cytoskeleton remodeling_Cytoskeleton remodeling                           | 1.112E-03 | MyHC, VEGF-A, PAI1, Zyxin, MRLC, Paxillin, c-Jun, Caveolin-1, Collagen IV | 9 |
| Development_TGF-beta-dependent induction of EMT via MAPK                  | 1.132E-03 | Occludin, Vimentin, Claudin-1, PAI1, c-Jun                                | 5 |
| Immune response_Histamine H1 receptor signaling in immune response        | 1.267E-03 | Tissue factor, ICAM1, I-kB, c-Jun, IP3 receptor                           | 5 |
| Cytoskeleton remodeling_Role of Activin A in cytoskeleton remodeling      | 1.428E-03 | ACTA2, FTase-alpha, Paxillin, c-Jun                                       | 4 |
| Oxidative stress_Role of ASK1 under oxidative stress                      | 1.546E-03 | Oxidized thioredoxin, Thioredoxin, Glutaredoxin, Stathmin, GPX1           | 5 |
| Immune response_C5a signaling                                             | 1.573E-03 | I-kB, PAI1, G-protein alpha-i family, C5a, c-Jun                          | 5 |
| Cytoskeleton remodeling_TGF, WNT and cytoskeletal remodeling              | 2.014E-03 | VEGF-A, WIF1, Actin, PAI1, MRLC, Paxillin, c-Jun, Caveolin-1, Collagen IV | 9 |
| Expression targets of Tissue factor signaling in cancer                   | 2.072E-03 | Tissue factor, GFPT2, PAI1, Cyr61                                         | 4 |
| Immune response_MIF-mediated glucocorticoid regulation                    | 2.072E-03 | ICAM1, I-kB, c-Jun                                                        | 3 |
| Reproduction_GnRH signaling                                               | 2.261E-03 | MKP-2,PER1, CG alpha, c-Jun, IP3 receptor, NUR77                          | 6 |
| Transcription_Role of AP-1 in regulation of cellular metabolism           | 2.568E-03 | ITGB4, FXYD2, CG alpha, c-Jun                                             | 4 |
| Cytoskeleton remodeling_Neurofilaments                                    | 3.376E-03 | Desmin, Vimentin, BPAG1, Tubulin alpha                                    | 4 |
| Development_Cross-talk between VEGF and Angiopoietin 1 signaling pathways | 3.911E-03 | ICAM1, I-kB, VEGF-A, IP3 receptor                                         | 4 |

|                                                                                |           |                                                                   |   |
|--------------------------------------------------------------------------------|-----------|-------------------------------------------------------------------|---|
| Muscle contraction_Delta-type opioid receptor in smooth muscle contraction     | 3.911E-03 | G-protein alpha-i family, MRLC, MYRL2, IP3 receptor               | 4 |
| Apoptosis and survival_Inhibition of ROS-induced apoptosis by 17beta-estradiol | 4.913E-03 | Oxidized thioredoxin, Thioredoxin, p22-phox, I-kB, GPX1           | 5 |
| Role of alpha-6/beta-4 integrins in carcinoma progression                      | 5.415E-03 | ITGB4, HGF receptor (Met), Laminin 5, VEGF-A, IP3 receptor        | 5 |
| Development_Role of IL-8 in angiogenesis                                       | 5.968E-03 | I-kB, VEGF-A, S1P, G-protein alpha-i family, Paxillin, Caveolin-1 | 6 |
| Development_Transcription factors in segregation of hepatocytic lineage        | 6.624E-03 | Alpha 1-antitrypsin, HGF receptor (Met), A2M, Keratin 19          | 4 |
| Muscle contraction_Relaxin signaling pathway                                   | 7.137E-03 | I-kB, VEGF-A, G-protein alpha-i family, PDE4D                     | 4 |
| Cell adhesion_Integrin-mediated cell adhesion and migration                    | 7.137E-03 | MyHC, Zyxin, MRLC, Paxillin, Collagen IV                          | 5 |
| Cytoskeleton remodeling_Reverse signaling by ephrin B                          | 7.456E-03 | RGS3, G-protein alpha-i family, Tubulin alpha, Paxillin           | 4 |
| DNA damage_ATM/ATR regulation of G1/S checkpoint                               | 8.355E-03 | GADD45 alpha, Chk2, I-kB, Cyclin D                                | 4 |
| Multiple myeloma (general schema)                                              | 9.965E-03 | VEGF-A, Cyclin D3, DKK1                                           | 3 |

---

Table S11. Significant pathway maps, as analyzed by MetaCore with differentially expressed genes identified in RNA-Seq from K369R- and KLF5-expressing DU 145 xenograft tumors. All maps with *p* value less than 0.01 are shown, and ranked by *p* value from low to high.

| <b>Maps</b>                                                  | <b><i>p</i> Value</b> | <b>Genes</b>                                                                                                                                    | <b>Number</b> |
|--------------------------------------------------------------|-----------------------|-------------------------------------------------------------------------------------------------------------------------------------------------|---------------|
| Cell adhesion_Chemokines and adhesion                        | 7.236E-08             | CD44, Caveolin-2, PLAUR (uPAR), Actin, Alpha-actinin, LAMA4, PAI1, Zyxin, PLAU (UPA), Paxillin, c-Jun, Alpha-actinin 1, Caveolin-1, Collagen IV | 14            |
| Blood coagulation_Blood coagulation                          | 2.606E-06             | Tissue factor, Alpha 1-antitrypsin, A2M, Coagulation factor XIII A, Fibrinogen gamma, PAI1, PLAU (UPA), Fibrinogen alpha                        | 8             |
| Cell adhesion_ECM remodeling                                 | 2.738E-06             | CD44, TIMP2, Laminin 5, PLAUR (uPAR), Osteonectin, LAMA4, PAI1, PLAU (UPA), Collagen IV                                                         | 9             |
| Cytoskeleton remodeling_Cytoskeleton remodeling              | 4.209E-06             | PLAUR (uPAR), MyHC, Alpha-actinin, PAI1, Zyxin, PLAU (UPA), MRLC, Paxillin, c-Jun, Alpha-actinin 1, Caveolin-1, Collagen IV                     | 12            |
| Expression targets of Tissue factor signaling in cancer      | 8.367E-06             | Tissue factor, GFPT2, PLAUR (uPAR), PAI1, PLAU (UPA), Cyr61                                                                                     | 6             |
| Cytoskeleton remodeling_TGF, WNT and cytoskeletal remodeling | 1.021E-05             | PLAUR (uPAR), Actin, Alpha-actinin, PAI1, PLAU (UPA), MRLC, Paxillin, c-Jun, Alpha-actinin 1, MDM2, Caveolin-1, Collagen IV                     | 12            |
| Cytoskeleton remodeling_Keratin filaments                    | 1.636E-05             | Vimentin, Keratin 6C, Keratin 7, BPAG1, Keratin 19, Tubulin alpha                                                                               | 6             |
| Transcription_Role of AP-1 in regulation of cellular         | 2.377E-05             | ITGB4, PLAUR (uPAR), c-Jun, c-Fos, CG alpha,                                                                                                    | 6             |

|                                                                         |           |                                                                            |   |
|-------------------------------------------------------------------------|-----------|----------------------------------------------------------------------------|---|
| metabolism                                                              |           | AP-1                                                                       |   |
| Cell                                                                    | 2.387E-05 | PTPRF (LAR), HGF                                                           | 6 |
| adhesion_Cadherin-mediated cell adhesion                                |           | receptor (Met), M-cadherin, Actin, P-cadherin, Plakoglobin                 |   |
| Apoptosis and survival_Endoplasmic reticulum stress response pathway    | 3.738E-05 | IP3R1, c-Jun/c-Fos, XBP1, S1P, C/EBP zeta, EDEM, HERP                      | 7 |
| Reproduction_GnRH signaling                                             | 4.224E-05 | MKP-2, c-Jun, PER1, CG alpha, IP3 receptor, NUR77, c-Fos                   | 7 |
| Development_TGF-beta-dependent induction of EMT via MAPK                | 9.908E-05 | Vimentin, Claudin-1, PAI1, c-Jun, c-Fos                                    | 5 |
| Cell adhesion_Cell-matrix glycoconjugates                               | 2.264E-04 | CD44, TIMP2, CEACAM5, Tenascin-C, ECM1, MUC1                               | 6 |
| Immune response_Human NKG2D signaling                                   | 2.264E-04 | MICB, c-Jun, IP3 receptor, c-Fos                                           | 4 |
| Development_Transcription factors in segregation of hepatocytic lineage | 5.932E-04 | Alpha 1-antitrypsin, HGF receptor (Met), A2M, Keratin 7, Keratin 19        | 5 |
| Immune response_MIF-induced cell adhesion, migration and angiogenesis   | 6.576E-04 | ICAM1, CD44, c-Jun, c-Fos                                                  | 4 |
| Development_Regulation of epithelial-to-mesenchymal transition (EMT)    | 6.993E-04 | HGF receptor (Met), Vimentin, Claudin-1, Tropomyosin-1, PAI1, FGFR1, c-Jun | 7 |
| Stimulation of TGF-beta signaling in lung cancer                        | 8.287E-04 | Furin, Vimentin, Tropomyosin-1, Keratin 19, PAI1, Tropomyosin-2            | 6 |
| Immune response_Histamine H1 receptor signaling in immune response      | 8.287E-04 | Tissue factor, ICAM1, c-Jun, IP3 receptor, c-Fos                           | 5 |
| Cell adhesion_Integrin-mediated cell adhesion and migration             | 8.287E-04 | MyHC, Alpha-actinin, Zyxin, MRLC, Paxillin, Collagen IV                    | 6 |
| Immune response_C5a signaling                                           | 1.032E-03 | PAI1, C5a, c-Jun, c-Fos                                                    | 4 |
| Development_WNT signaling pathway. Part 2                               | 1.407E-03 | CD44, Vimentin, Claudin-1, ENC1, c-Jun,                                    | 6 |

|                                                                     |           |                                                                             |   |
|---------------------------------------------------------------------|-----------|-----------------------------------------------------------------------------|---|
|                                                                     |           | DKK1                                                                        |   |
| Immune response_HMGB1/RAGE signaling pathway                        | 1.407E-03 | Tissue factor, ICAM1, Chromogranin A, PAI1, Paxillin, c-Jun                 | 6 |
| Immune response_CCL2 signaling                                      | 1.553E-03 | ICAM1, c-Jun, c-Fos, Caveolin-1                                             | 4 |
| Immune response_Alternative complement pathway                      | 2.020E-03 | C5, Factor I, MCP                                                           | 3 |
| CFTR folding and maturation (normal and CF)                         | 2.148E-03 | HSP70, HSP40, HSP105, EDEM                                                  | 4 |
| Cytoskeleton remodeling_Neurofilaments                              | 2.511E-03 | Desmin, Vimentin, BPAG1, Tubulin alpha                                      | 4 |
| Immune response_IL-18 signaling                                     | 2.680E-03 | IL-18, ICAM1, c-Jun, c-Fos                                                  | 4 |
| Immune response_Murine NKG2D signaling                              | 2.821E-03 | c-Jun, IP3 receptor, c-Fos                                                  | 3 |
| Cell cycle_Regulation of G1/S transition (part 2)                   | 2.913E-03 | Cyclin D3, c-Jun, Cyclin D, c-Fos                                           | 4 |
| Cell adhesion_Endothelial cell contacts by junctional mechanisms    | 2.913E-03 | Vimentin, Claudin-1, Alpha-actinin, Plakoglobin                             | 4 |
| Regulation of Tissue factor signaling in cancer                     | 3.132E-03 | Tissue factor, EPAS1, c-Jun                                                 | 3 |
| Development_VEGF signaling via VEGFR2 - generic cascades            | 3.441E-03 | PLAUR (uPAR), c-Jun/c-Fos, HSP27, PLAU (UPA), Paxillin, c-Jun, IP3 receptor | 7 |
| Immune response_IL-1 signaling pathway                              | 3.468E-03 | Tissue factor, PAI1, c-Jun, c-Fos                                           | 4 |
| Development_Ligand-dependent activation of the ESR1/AP-1 pathway    | 3.806E-03 | c-Jun, c-Fos                                                                | 2 |
| Development_EPO-induced MAPK pathway                                | 3.828E-03 | MGF, Lyn, c-Jun, IP3 receptor, c-Fos                                        | 5 |
| Muscle contraction_Regulation of eNOS activity in endothelial cells | 4.015E-03 | EPAS1, ETS2, c-Jun, IP3 receptor, Caveolin-1                                | 5 |
| Immune response_IL-5 signalling                                     | 4.215E-03 | ICAM1, Lyn, Cyclin D3, c-Jun, c-Fos                                         | 5 |
| Role of Tissue factor-induced Thrombin signaling in cancerogenesis  | 4.332E-03 | Tissue factor, MRLC, Paxillin, c-Jun, IP3 receptor, Fibrinogen alpha        | 6 |
| Immune response_Lectin                                              | 5.541E-03 | C5, Factor I, MCP                                                           | 3 |

|                                                                                  |           |                                                       |   |
|----------------------------------------------------------------------------------|-----------|-------------------------------------------------------|---|
| induced complement pathway                                                       |           |                                                       |   |
| Immune response_ETV3 affect on CSF1-promoted macrophage differentiation          | 5.598E-03 | ETS2, PLAU (UPA), c-Jun, c-Fos                        | 4 |
| Inhibition of neutrophil migration by proresolving lipid mediators in COPD       | 5.788E-03 | ICAM1, c-Fos, Alpha-actinin, C5a, c-Jun, IP3 receptor | 6 |
| Immune response_Classical complement pathway                                     | 7.139E-03 | C5, Factor I, MCP                                     | 3 |
| Oxidative stress_Role of ASK1 under oxidative stress                             | 7.813E-03 | Oxidized thioredoxin, HSP70, Thioredoxin, GPX1        | 4 |
| Development_Role of proteases in hematopoietic stem cell mobilization            | 7.964E-03 | CD44, MGF, Carboxypeptidase M                         | 3 |
| Immune response_HSP60 and HSP70/ TLR signaling pathway                           | 8.366E-03 | ICAM1, HSP70, c-Fos, c-Jun                            | 4 |
| Androstenedione and testosterone biosynthesis and metabolism p.2                 | 8.662E-03 | AKR1C2, AKR1C1, AKR1C3, AKR1C4                        | 4 |
| Cell adhesion_Plasmin signaling                                                  | 8.662E-03 | TFPI-2, PLAU (UPA), FGFR1, Collagen IV                | 4 |
| HBV signaling via protein kinases leading to HCC                                 | 9.570E-03 | c-Jun, c-Fos                                          | 2 |
| Androstenedione and testosterone biosynthesis and metabolism p.2/ Rodent version | 9.570E-03 | AKR1C2, AKR1C1, AKR1C3, AKR1C4                        | 4 |

---

Table S12. Molecular networks and related biological processes identified by MetaCore's network analysis algorithm with differentially expressed genes between KLF5 and the PLHCX vector control. Networks are ranked by their *p* values. Total nodes refer to all nodes in a network, and seed nodes refer to differentially expressed genes between the two groups.

| # | Network                                                | GO processes                                                                                                                                                                                                                                                                                                           | Total nodes | Seed nodes | Pathways | <i>p</i> value | zScore | gScore |
|---|--------------------------------------------------------|------------------------------------------------------------------------------------------------------------------------------------------------------------------------------------------------------------------------------------------------------------------------------------------------------------------------|-------------|------------|----------|----------------|--------|--------|
| 1 | Calgranulin A, HSPA1A, A2M, KLF5, AML1 (RUNX1)         | response to organic substance (88.0%; 8.309e-15), positive regulation of progesterone secretion (20.0%; 1.238e-14), positive regulation of myeloid cell differentiation (36.0%; 1.873e-14), regulation of hair follicle cell proliferation (20.0%; 4.331e-14), regulation of progesterone secretion (20.0%; 4.331e-14) | 50          | 9          | 0        | 1.080E-18      | 49.7   | 49.7   |
| 2 | HLA-F, FTase-alpha, CEACAM5, HSPA1B, AK3               | gamma-aminobutyric acid signaling pathway (35.4%; 2.434e-32), synaptic transmission, GABAergic (29.2%; 6.390e-29), chloride transport (35.4%; 1.835e-26), inorganic anion transport (35.4%; 1.469e-24), innervation (25.0%; 6.699e-23)                                                                                 | 50          | 7          | 0        | 6.670E-15      | 36.53  | 36.53  |
| 3 | ALDR, Calgranulin B, KLF5, CRABP2, Calgranulin A       | response to organic substance (78.8%; 5.645e-15), regulation of mismatch repair (15.2%; 9.228e-15), canonical Wnt receptor signaling pathway (27.3%; 1.981e-13), regulation of signal transduction (66.7%; 2.518e-12), cellular response to stimulus (93.9%; 3.777e-12)                                                | 50          | 6          | 0        | 3.180E-13      | 35.68  | 35.68  |
| 4 | microRNA 663, FXYD2, VEGF-A, Beta-arrestin1, PKC-delta | positive regulation of cellular metabolic process (83.0%; 4.347e-27), regulation of immune system process (70.2%; 8.627e-27), Fc-epsilon receptor signaling pathway (42.6%; 2.405e-26), positive regulation of metabolic process (83.0%; 4.610e-26), Fc receptor signaling pathway (44.7%; 9.352e-26)                  | 50          | 4          | 0        | 6.560E-08      | 20.37  | 20.37  |

Table S13. Molecular networks and related biological processes identified by MetaCore's network analysis algorithm with differentially expressed genes between K369R and the PLHCX vector control. Networks are ranked by their *p* values. Total nodes refer to all nodes in a network, and seed nodes refer to differentially expressed genes between the two groups.

| #  | Network                                                   | GO processes                                                                                                                                                                                                                                                                                                                                                                                 | Total nodes | Seed nodes | Pathways | <i>p</i> value | zScore | gScore |
|----|-----------------------------------------------------------|----------------------------------------------------------------------------------------------------------------------------------------------------------------------------------------------------------------------------------------------------------------------------------------------------------------------------------------------------------------------------------------------|-------------|------------|----------|----------------|--------|--------|
| 1  | Factor B, NFKBIA, p22-phox, TC1, ST5                      | superoxide anion generation (17.4%; 3.232e-17), smooth muscle hypertrophy (13.0%; 1.101e-16), negative regulation of renal output by angiotensin (13.0%; 1.101e-16), negative regulation of glomerular filtration by angiotensin (13.0%; 1.101e-16), hydrogen peroxide biosynthetic process (15.2%; 3.766e-16)                                                                               | 50          | 20         | 2        | 1.050E-25      | 28.12  | 30.62  |
| 2  | c-Jun, EDIL3, PHLDA3, Brush border myosin I, CD70(TNFSF7) | G-protein coupled purinergic receptor signaling pathway (20.5%; 1.632e-18), G-protein coupled purinergic nucleotide receptor signaling pathway (18.2%; 3.760e-18), purinergic receptor signaling pathway (20.5%; 2.705e-17), purinergic nucleotide receptor signaling pathway (18.2%; 2.121e-16), phospholipase C-activating G-protein coupled receptor signaling pathway (25.0%; 3.898e-16) | 50          | 17         | 1        | 1.220E-21      | 24.36  | 25.61  |
| 3  | Trp53inp2, CHMP1B, RNF141, FAM62A, C4orf34                | cAMP metabolic process (21.7%; 1.198e-17), cyclic nucleotide metabolic process (21.7%; 3.799e-15), cAMP catabolic process (15.2%; 1.681e-14), cyclic nucleotide catabolic process (15.2%; 3.686e-14), purine ribonucleotide metabolic process (37.0%; 2.561e-13)                                                                                                                             | 50          | 13         | 0        | 2.400E-16      | 19.45  | 19.45  |
| 4  | IRNA, NAB2, BPAG1, LAMB3, UBE2F                           | MAPK cascade (20.7%; 2.427e-06), intracellular protein kinase cascade (24.1%; 7.769e-06), SCF-dependent proteasomal ubiquitin-dependent protein catabolic process (10.3%; 8.951e-06), regulation of appetite (10.3%; 9.974e-06), phospholipase D-activating G-protein coupled receptor signaling pathway (6.9%; 1.233e-05)                                                                   | 50          | 13         | 0        | 6.020E-16      | 20     | 20     |
| 5  | MYRL2, RRAD, Tob1, BAIAP2, NAB2                           | regulation of system process (38.0%; 4.629e-14), regulation of multicellular organismal process (60.0%; 6.531e-14), cell surface receptor signaling pathway (68.0%; 8.898e-14), smooth muscle contraction (18.0%; 5.432e-13), phospholipase C-activating G-protein coupled acetylcholine receptor signaling pathway (10.0%; 1.723e-12)                                                       | 50          | 12         | 0        | 1.310E-14      | 17.71  | 17.71  |
| 6  | AP1S1A, Tmem205, ABCA2, WSB1, LETM2                       | regulation of defense response to virus by virus (19.6%; 4.442e-16), intracellular protein transport (37.0%; 4.670e-13), regulation of response to biotic stimulus (21.7%; 1.177e-12), regulation of defense response to virus (19.6%; 1.787e-12), post-Golgi vesicle-mediated transport (19.6%; 2.327e-12)                                                                                  | 50          | 12         | 0        | 4.770E-13      | 16.18  | 16.18  |
| 7  | Slc35f3, SLC25A37, CAT3, CENTG3, Clathrin light chain B   | glucose transport (22.4%; 8.759e-17), hexose transport (22.4%; 1.006e-16), monosaccharide transport (22.4%; 1.321e-16), mitotic nuclear envelope disassembly (18.4%; 6.532e-16), nuclear envelope disassembly (18.4%; 1.035e-15)                                                                                                                                                             | 50          | 11         | 0        | 6.070E-13      | 16     | 16     |
| 8  | CHP1, RNMT, DTX2, PHP14, ARPC1B                           | proton transport (40.0%; 4.025e-33), hydrogen transport (40.0%; 5.983e-33), mitochondrial ATP synthesis coupled proton transport (22.0%; 1.305e-24), energy coupled proton transport, down electrochemical gradient (24.0%; 2.117e-24), ATP synthesis coupled proton transport (24.0%; 2.117e-24)                                                                                            | 50          | 10         | 0        | 7.860E-12      | 15.16  | 15.16  |
| 9  | CORO6, FMNL3, ST4S6, RhoD, OLFM2                          | energy coupled proton transport, down electrochemical gradient (18.8%; 2.462e-17), ATP synthesis coupled proton transport (18.8%; 2.462e-17), mitochondrial ATP synthesis coupled proton transport (16.7%; 7.768e-17), ATP biosynthetic process (18.8%; 8.851e-15), synaptic transmission (39.6%; 1.743e-14)                                                                                 | 50          | 10         | 0        | 7.860E-12      | 15.16  | 15.16  |
| 10 | SLC22A3, EGFL7, PYGL, CD68, S1P                           | regulation of protein complex assembly (38.2%; 4.918e-16), regulation of actin filament polymerization (26.5%; 4.591e-13), immune response-regulating cell surface receptor signaling pathway involved in phagocytosis (26.5%; 8.172e-13), Fc-gamma receptor signaling pathway involved in phagocytosis (26.5%; 8.172e-13), Fc-gamma receptor signaling pathway (26.5%; 8.760e-13)           | 55          | 10         | 3        | 1.240E-11      | 14.81  | 18.56  |
| 11 | PABPC1, LOXL3, RhoC, FTase-alpha, NPR3                    | cyclic nucleotide catabolic process (20.4%; 1.984e-21), cAMP catabolic process (18.4%; 2.561e-19), cAMP metabolic process (18.4%; 2.971e-15), cyclic nucleotide metabolic process (20.4%; 7.580e-15), cGMP catabolic process (12.2%; 1.373e-14)                                                                                                                                              | 50          | 11         | 0        | 1.240E-11      | 14.81  | 14.81  |



|    |                                                           |                                                                                                                                                                                                                                                                                                                                                          |    |    |    |           |       |       |
|----|-----------------------------------------------------------|----------------------------------------------------------------------------------------------------------------------------------------------------------------------------------------------------------------------------------------------------------------------------------------------------------------------------------------------------------|----|----|----|-----------|-------|-------|
| 12 | MYO1E, UAP1, FKBP10, Band 4.1-like protein 2, ATP11A      | cellular response to glucagon stimulus (38.8%; 4.129e-36), response to glucagon stimulus (38.8%; 4.095e-34), energy reserve metabolic process (44.9%; 1.383e-30), energy derivation by oxidation of organic compounds (44.9%; 2.200e-24), generation of precursor metabolites and energy (44.9%; 1.385e-22)                                              | 50 | 10 | 0  | 1.240E-11 | 14.81 | 14.81 |
| 13 | GALNT2, IMPA2, NPM3, MA2A1, DNAJC12                       | viral transcription (28.6%; 3.180e-22), translational termination (28.6%; 7.132e-22), viral gene expression (28.6%; 2.051e-21), protein targeting to membrane (32.7%; 2.483e-21), nuclear-transcribed mRNA catabolic process (32.7%; 1.526e-20)                                                                                                          | 50 | 10 | 0  | 1.550E-11 | 14.65 | 14.65 |
| 14 | MICB, NDPK D (mitochondrial), AKR1C1, FACVL1, Calgizzarin | viral transcription (18.2%; 7.346e-09), translational termination (18.2%; 1.019e-08), viral gene expression (18.2%; 1.567e-08), symbiosis, encompassing mutualism through parasitism (36.4%; 1.570e-08), interspecies interaction between organisms (36.4%; 1.570e-08)                                                                                   | 50 | 9  | 0  | 1.980E-10 | 13.74 | 13.74 |
| 15 | ICA69, NTPBP, PREI4, Zizimin 1, SBDS                      | signal peptide processing (14.3%; 1.286e-14), regulation of secretion (35.7%; 1.069e-11), regulation of cellular localization (40.5%; 2.785e-11), regulation of hormone secretion (26.2%; 4.860e-11), single-organism transport (61.9%; 5.705e-11)                                                                                                       | 50 | 9  | 0  | 2.990E-10 | 13.42 | 13.42 |
| 16 | BNaC1 (ASIC2), CLF-1, Stomatin, HERP, 6PGD                | muscle contraction (30.2%; 1.984e-14), muscle organ development (32.6%; 4.546e-14), muscle filament sliding (18.6%; 1.024e-13), actin-myosin filament sliding (18.6%; 1.217e-13), actin filament-based movement (20.9%; 1.563e-13)                                                                                                                       | 50 | 9  | 0  | 2.990E-10 | 13.42 | 13.42 |
| 17 | FUS, PMCA4, M-cadherin, GRAIL, Rab-32                     | cell-cell signaling (43.5%; 7.407e-13), signaling (82.6%; 1.067e-12), single organism signaling (82.6%; 1.067e-12), regulation of signaling (60.9%; 2.157e-12), cell communication (82.6%; 2.611e-12)                                                                                                                                                    | 50 | 10 | 0  | 2.990E-10 | 13.42 | 13.42 |
| 18 | PHI-1, TSSC3, H41, SAHH2, PLEKHG4                         | cell-cell recognition (14.6%; 2.942e-10), canonical Wnt receptor signaling pathway (16.7%; 3.297e-10), binding of sperm to zona pellucida (12.5%; 1.640e-09), cell recognition (16.7%; 1.757e-09), cell-cell signaling (35.4%; 1.834e-09)                                                                                                                | 50 | 9  | 0  | 4.440E-10 | 13.12 | 13.12 |
| 19 | KPR2, ZIP7 (SLC39A7), TMED3, TRL1, NOL6                   | SRP-dependent cotranslational protein targeting to membrane (36.4%; 2.640e-25), cotranslational protein targeting to membrane (36.4%; 3.519e-25), viral transcription (34.1%; 4.241e-25), protein targeting to ER (36.4%; 4.666e-25), establishment of protein localization to endoplasmic reticulum (36.4%; 5.363e-25)                                  | 50 | 8  | 0  | 9.440E-09 | 11.72 | 11.72 |
| 20 | IP-30, Zyxin, CLIC4, TIMP2, HIG 2                         | cell-cell signaling (53.1%; 4.716e-19), cell surface receptor signaling pathway (75.5%; 2.677e-17), protein kinase C-activating G-protein coupled receptor signaling pathway (20.4%; 5.659e-17), positive regulation of protein transport (28.6%; 1.170e-15), phospholipase C-activating G-protein coupled receptor signaling pathway (22.4%; 1.449e-15) | 50 | 9  | 2  | 1.120E-08 | 11.59 | 14.09 |
| 21 | HIF-prolyl hydroxylase, TOP2, LTBP1, VAMP2, PAG           | phosphatidylinositol-mediated signaling (27.3%; 9.287e-12), inositol lipid-mediated signaling (27.3%; 9.771e-12), epidermal growth factor receptor signaling pathway (27.3%; 1.049e-10), ERBB signaling pathway (27.3%; 1.090e-10), fibroblast growth factor receptor signaling pathway (24.2%; 1.114e-09)                                               | 50 | 7  | 0  | 6.810E-08 | 11.11 | 11.11 |
| 22 | Factor I, MCP, C3b, Clathrin light chain, BCoR            | response to growth factor stimulus (54.8%; 6.250e-22), cellular response to growth factor stimulus (52.4%; 5.175e-21), response to organic substance (81.0%; 6.843e-20), cellular response to organic substance (71.4%; 1.405e-19), G-protein coupled receptor signaling pathway, coupled to cyclic nucleotide second messenger (35.7%; 2.497e-19)       | 50 | 7  | 0  | 2.110E-07 | 10.17 | 10.17 |
| 23 | Paxillin, VEGF-A, c-Jun, FGFR1, IP3 receptor              | enzyme linked receptor protein signaling pathway (72.9%; 1.189e-35), <i>Fcreceptor signaling pathway</i> (54.2%; 1.604e-34), regulation of immune system process (79.2%; 4.938e-34), response to growth factor stimulus (66.7%; 5.379e-34), cellular response to growth factor stimulus (64.6%; 4.245e-33)                                               | 57 | 7  | 10 | 5.530E-07 | 9.42  | 21.92 |
| 24 | MYO1C, FHOD1, DIPA, CREB1, APOA4                          | regulation of translational initiation in response to stress (17.1%; 1.596e-15), negative regulation of translational initiation in response to stress (14.3%; 7.563e-14), regulation of translation in response to stress (17.1%; 9.439e-14), translational initiation (28.6%; 1.340e-13), regulation of translational initiation (22.9%; 1.281e-12)    | 50 | 6  | 0  | 1.340E-06 | 9.57  | 9.57  |
| 25 | Slc39a14 (Zip14), SLC46A3, LBH, ZNF189, ATP6V1G1          | divalent metal ion transport (34.0%; 2.831e-18), divalent inorganic cation transport (34.0%; 3.928e-18), calcium ion transmembrane transport (27.7%; 1.208e-17), calcium ion transport (31.9%; 2.928e-17), metal ion transport (40.4%; 3.016e-16)                                                                                                        | 50 | 7  | 0  | 2.080E-06 | 9.19  | 9.19  |

|    |                                                                     |                                                                                                                                                                                                                                                                                                                                                         |    |   |    |           |      |       |
|----|---------------------------------------------------------------------|---------------------------------------------------------------------------------------------------------------------------------------------------------------------------------------------------------------------------------------------------------------------------------------------------------------------------------------------------------|----|---|----|-----------|------|-------|
| 26 | ERK4, FBXW2, DNAJB2, MTCH1, G-protein alpha-i family                | energy reserve metabolic process (29.2%; 1.020e-16), cellular response to glucagon stimulus (20.8%; 3.439e-16), response to glucagon stimulus (20.8%; 3.187e-15), calcium ion transmembrane transport (22.9%; 4.146e-14), energy derivation by oxidation of organic compounds (29.2%; 6.793e-13)                                                        | 52 | 5 | 2  | 5.260E-05 | 7.26 | 9.76  |
| 27 | WIF1, Semaphorin 7A, PMEPA1, RGC32, CREB1                           | serotonin receptor signaling pathway (22.4%; 1.018e-24), cell-cell signaling (59.2%; 6.148e-23), synaptic transmission (51.0%; 5.144e-22), G-protein coupled receptor signaling pathway, coupled to cyclic nucleotide second messenger (34.7%; 1.697e-21), adenylate cyclase-modulating G-protein coupled receptor signaling pathway (32.7%; 6.601e-21) | 50 | 5 | 0  | 7.160E-05 | 6.99 | 6.99  |
| 28 | Tropomyosin, Troponin I, fast skeletal muscle, SCAMP1, FADS1, CREB1 | synaptic transmission, cholinergic (24.4%; 8.748e-21), behavioral response to nicotine (17.8%; 1.549e-17), muscle contraction (33.3%; 3.473e-17), muscle system process (33.3%; 6.302e-16), synaptic transmission (42.2%; 4.144e-15)                                                                                                                    | 50 | 4 | 0  | 5.080E-04 | 6    | 6     |
| 29 | G-protein alpha-i family, DKK1, CEACAM5, WIF1, c-Myc                | Wnt receptor signaling pathway (37.5%; 4.339e-21), canonical Wnt receptor signaling pathway (29.2%; 9.792e-21), viral transcription (27.1%; 2.339e-20), translational termination (27.1%; 4.927e-20), viral gene expression (27.1%; 1.305e-19)                                                                                                          | 50 | 4 | 34 | 9.900E-04 | 5.39 | 47.89 |

Table S14. Molecular networks and related biological processes identified by MetaCore's network analysis algorithm with differentially expressed genes between K369R and KLF5. Networks are ranked by their *p* values. Total nodes refer to all nodes in a network, and seed nodes refer to differentially expressed genes between the two groups.

| #  | Network                                                        | GO processes                                                                                                                                                                                                                                                                                                                                                                                                     | Total nodes | Seed nodes | Pathways | <i>p</i> value | zScore | gScore |
|----|----------------------------------------------------------------|------------------------------------------------------------------------------------------------------------------------------------------------------------------------------------------------------------------------------------------------------------------------------------------------------------------------------------------------------------------------------------------------------------------|-------------|------------|----------|----------------|--------|--------|
| 1  | Keratin 7, 6PGD, PLOD2, MIG6, TANC2                            | regulation of translational initiation in response to stress (12.2%; 1.373e-14), negative regulation of translational initiation in response to stress (10.2%; 4.440e-13), regulation of translation in response to stress (12.2%; 8.087e-13), translational initiation (20.4%; 5.448e-12), negative regulation of translation in response to stress (10.2%; 9.273e-12)                                          | 50          | 28         | 2        | 1.450E-45      | 43.27  | 45.77  |
| 2  | FXYD3, Fibrinogen gamma, AKR1C3, Tropomyosin-2, TM4SF1 (TAAL6) | muscle contraction (21.4%; 6.505e-09), muscle system process (21.4%; 3.497e-08), muscle filament sliding (11.9%; 5.890e-08), actin-myosin filament sliding (11.9%; 6.534e-08), regeneration (19.0%; 7.006e-08)                                                                                                                                                                                                   | 50          | 26         | 0        | 3.390E-42      | 41.44  | 41.44  |
| 3  | PGD2R, Basonuclin, ITGB5, CEACAM6, TFPI-2                      | single-multicellular organism process (88.4%; 1.269e-11), developmental process (79.1%; 3.659e-11), multicellular organismal process (88.4%; 4.817e-11), multicellular organismal development (74.4%; 1.296e-10), cellular response to chemical stimulus (55.8%; 1.393e-10)                                                                                                                                      | 52          | 24         | 5        | 5.150E-37      | 37     | 43.25  |
| 4  | AP1S1A, LOXL3, Tmem64, FADS1, MALL                             | regulation of dopamine metabolic process (18.0%; 2.412e-18), regulation of catecholamine metabolic process (18.0%; 3.761e-18), G-protein coupled receptor signaling pathway, coupled to cyclic nucleotide second messenger (26.0%; 7.375e-15), fear response (18.0%; 1.561e-14), behavioral fear response (16.0%; 5.264e-13)                                                                                     | 50          | 23         | 0        | 1.870E-33      | 34.59  | 34.59  |
| 5  | IL-18, CG alpha, Hrs, Pitx1, ACTA1                             | anatomical structure development (77.1%; 4.041e-13), peptide hormone processing (14.6%; 4.428e-12), regulation of hormone levels (25.0%; 1.073e-11), developmental process (77.1%; 1.941e-11), single-organism developmental process (68.8%; 2.311e-11)                                                                                                                                                          | 50          | 21         | 0        | 3.040E-29      | 31.05  | 31.05  |
| 6  | Slc39a14 (Zip14), TSSC3, H41, UAP1, LRCH4                      | glutamate receptor signaling pathway (14.0%; 7.667e-11), ionotropic glutamate receptor signaling pathway (12.0%; 1.059e-10), regulation of synaptic transmission, glutamatergic (14.0%; 2.581e-10), positive regulation of synaptic transmission, GABAergic (10.0%; 9.329e-10), positive regulation of synaptic transmission, glutamatergic (10.0%; 1.576e-08)                                                   | 50          | 19         | 0        | 1.950E-25      | 27.88  | 27.88  |
| 7  | AKR1C1, ETV6(TEL1), Midkine, ICAP-1, BMP1                      | cell-substrate adhesion (25.8%; 4.673e-10), cell-substrate junction assembly (19.4%; 5.006e-10), cell junction assembly (25.8%; 6.192e-10), cell junction organization (25.8%; 2.277e-09), cellular response to organic substance (54.8%; 5.253e-09)                                                                                                                                                             | 50          | 14         | 0        | 6.600E-20      | 24.29  | 24.29  |
| 8  | HGF receptor (Met), Lyn, MGF, ETS, CD44 (ICD)                  | positive regulation of intracellular protein kinase cascade (47.8%; 3.079e-20), response to cytokine stimulus (47.8%; 1.253e-18), regulation of intracellular protein kinase cascade (50.0%; 3.972e-18), cellular response to chemical stimulus (69.6%; 1.099e-17), positive regulation of signal transduction (52.2%; 1.357e-17)                                                                                | 50          | 14         | 10       | 1.970E-18      | 21.78  | 34.28  |
| 9  | MYRL2, OATP8, Ca-ATPase1, TAP2 (PSF2), EPLIN                   | muscle system process (36.7%; 9.466e-20), actin filament-based movement (22.4%; 1.154e-16), regulation of system process (40.8%; 1.901e-15), muscle filament sliding (18.4%; 2.971e-15), actin-myosin filament sliding (18.4%; 3.617e-15)                                                                                                                                                                        | 50          | 14         | 0        | 2.740E-18      | 21.54  | 21.54  |
| 10 | FAM69B, CHC22, RhoD, RNMT, CAT-3                               | regulation of very-low-density lipoprotein particle remodeling (26.2%; 3.146e-25), high-density lipoprotein particle clearance (26.2%; 2.217e-24), positive regulation of cholesterol esterification (26.2%; 1.896e-23), phospholipid efflux (26.2%; 4.810e-23), regulation of cholesterol esterification (26.2%; 4.810e-23)                                                                                     | 50          | 14         | 0        | 2.960E-18      | 22.83  | 22.83  |
| 11 | PHI-1, Tropomyosin, MAP1LC3B, ES1, LBH                         | adenylate cyclase-modulating G-protein coupled receptor signaling pathway (24.5%; 2.810e-14), phospholipase C-activating G-protein coupled receptor signaling pathway (20.4%; 8.407e-14), G-protein coupled receptor signaling pathway, coupled to cyclic nucleotide second messenger (24.5%; 1.813e-13), G-protein coupled receptor signaling pathway (49.0%; 3.254e-13), muscle contraction (24.5%; 3.344e-12) | 50          | 14         | 0        | 3.780E-18      | 21.32  | 21.32  |

|    |                                                                      |                                                                                                                                                                                                                                                                                                                                                                                                                                                                                                                      |    |    |    |           |       |       |
|----|----------------------------------------------------------------------|----------------------------------------------------------------------------------------------------------------------------------------------------------------------------------------------------------------------------------------------------------------------------------------------------------------------------------------------------------------------------------------------------------------------------------------------------------------------------------------------------------------------|----|----|----|-----------|-------|-------|
| 12 | Tenascin-C, HGF receptor (Met), IDH2, Cyclin D, TIMP2                | cellular response to chemical stimulus (72.7%; 1.287e-18), regulation of multicellular organismal development (61.4%; 6.207e-18), response to organic substance (75.0%; 1.615e-17), cellular response to organic substance (65.9%; 1.822e-17), positive regulation of biological process (81.8%; 1.491e-15)                                                                                                                                                                                                          | 53 | 14 | 43 | 7.020E-18 | 20.88 | 74.63 |
| 13 | PERP, PLCB, GPX1, PHLDA3, Brush border myosin I                      | G-protein coupled purinergic receptor signaling pathway (16.1%; 4.247e-10), peptidyl-proline hydroxylation to 4-hydroxy-L-proline (12.9%; 6.087e-10), peptidyl-proline hydroxylation (12.9%; 1.591e-09), purinergic receptor signaling pathway (16.1%; 1.781e-09), relaxation of vascular smooth muscle (12.9%; 3.439e-09)                                                                                                                                                                                           | 50 | 13 | 0  | 3.830E-17 | 22.29 | 22.29 |
| 14 | nAChR beta-1, DTX2, Band 4.1-like protein 2, PREI4, Reticulocalbin-3 | synaptic transmission (46.8%; 1.752e-18), transmission of nerve impulse (46.8%; 3.771e-17), multicellular organismal signaling (46.8%; 6.922e-17), cell-cell signaling (46.8%; 7.734e-15), synaptic transmission, cholinergic (17.0%; 5.840e-14)                                                                                                                                                                                                                                                                     | 50 | 13 | 0  | 4.380E-15 | 18.58 | 18.58 |
| 15 | SNF2L1, FHOD1, PLEKHG4, IP-30, LAPTM4B                               | behavioral response to nicotine (21.7%; 6.714e-23), synaptic transmission involved in micturition (15.2%; 1.771e-18), response to nicotine (23.9%; 1.064e-17), micturition (17.4%; 8.672e-17), synaptic transmission, cholinergic (19.6%; 3.518e-16)                                                                                                                                                                                                                                                                 | 50 | 12 | 0  | 5.760E-15 | 18.38 | 18.38 |
| 16 | tRNA, Rbm47, ATP6M, CCDC57, SART2                                    | transferrin transport (37.0%; 2.194e-34), ferric iron transport (37.0%; 7.605e-34), trivalent inorganic cation transport (37.0%; 7.605e-34), phagosome maturation (37.0%; 3.751e-32), ATP hydrolysis coupled proton transport (34.8%; 7.689e-32)                                                                                                                                                                                                                                                                     | 50 | 11 | 0  | 1.050E-13 | 17.37 | 17.37 |
| 17 | PACE4, Paxillin, DDEF1, PABPC1, Semaphorin 4B                        | adenylate cyclase-modulating G-protein coupled receptor signaling pathway (31.2%; 2.443e-19), G-protein coupled receptor signaling pathway, coupled to cyclic nucleotide second messenger (31.2%; 2.608e-18), adenylate cyclase-activating G-protein coupled receptor signaling pathway (22.9%; 4.100e-16), response to organic substance (66.7%; 1.221e-14), receptor-mediated endocytosis (22.9%; 7.506e-14)                                                                                                       | 50 | 12 | 0  | 1.760E-13 | 16.98 | 16.98 |
| 18 | NOL6, KPR2, MA2A1, TRL1, Melanotransferrin                           | protein targeting to membrane (36.0%; 5.792e-13), establishment of protein localization to membrane (36.0%; 4.397e-12), translational elongation (32.0%; 1.054e-11), protein localization to membrane (36.0%; 9.017e-11), protein targeting (36.0%; 3.456e-09)                                                                                                                                                                                                                                                       | 50 | 11 | 0  | 2.670E-13 | 17.94 | 17.94 |
| 19 | Collagen IV, CLIM1, Tubulin alpha, COPS6, GRAIL                      | protein polymerization (34.0%; 1.260e-30), 'de novo' posttranslational protein folding (28.0%; 7.801e-24), 'de novo' protein folding (28.0%; 1.853e-23), cellular protein complex assembly (36.0%; 1.250e-20), GTP catabolic process (34.0%; 3.744e-19)                                                                                                                                                                                                                                                              | 50 | 11 | 4  | 2.860E-13 | 16.61 | 21.61 |
| 20 | ZIP7 (SLC39A7), IP3 receptor, Perlecan, FSRP, MCP                    | symbiosis, encompassing mutualism through parasitism (30.3%; 1.756e-06), interspecies interaction between organisms (30.3%; 1.756e-06), mitotic spindle organization in nucleus (6.1%; 2.678e-06), regeneration (18.2%; 4.274e-06), urate biosynthetic process (6.1%; 8.026e-06)                                                                                                                                                                                                                                     | 50 | 10 | 0  | 1.910E-12 | 16.32 | 16.32 |
| 21 | AKR1C4, CRABP2, Alpha crystallin B, P-cadherin, Cyclin D3            | response to hormone stimulus (52.4%; 2.554e-08), response to stimulus (100.0%; 9.497e-08), response to oxygen-containing compound (57.1%; 9.813e-08), response to endogenous stimulus (57.1%; 1.112e-07), response to chemical stimulus (81.0%; 1.361e-07)                                                                                                                                                                                                                                                           | 50 | 9  | 0  | 1.930E-12 | 17.72 | 17.72 |
| 22 | SLC25A37, Troponin I, fast skeletal muscle, FKBP10, Trp53inp2, CAT2  | cellular response to glucagon stimulus (40.8%; 1.409e-38), response to glucagon stimulus (40.8%; 1.865e-36), nucleobase-containing compound catabolic process (65.3%; 8.341e-31), cellular nitrogen compound catabolic process (65.3%; 4.559e-30), heterocycle catabolic process (65.3%; 5.176e-30)                                                                                                                                                                                                                  | 50 | 10 | 0  | 6.280E-12 | 15.38 | 15.38 |
| 23 | ASSY, EMP2, RRAD, PAG, PMCA4                                         | positive regulation of T cell mediated cytotoxicity (38.0%; 1.073e-36), regulation of T cell mediated cytotoxicity (38.0%; 1.315e-35), antigen processing and presentation of endogenous peptide antigen via MHC class I via ER pathway (28.0%; 3.747e-35), antigen processing and presentation of endogenous peptide antigen via MHC class I via ER pathway, TAP-dependent (28.0%; 3.747e-35), antigen processing and presentation of exogenous peptide antigen via MHC class I, TAP-independent (30.0%; 1.294e-34) | 50 | 10 | 0  | 9.720E-12 | 15.04 | 15.04 |
| 24 | CD68, ZNF189, Optineurin, EPLIN, Filamin C                           | regulation of locomotion (41.0%; 1.153e-13), regulation of cell migration (38.5%; 3.578e-13), regulation of cell motility (38.5%; 7.789e-13), locomotion (48.7%; 1.241e-12), regulation of cellular component movement (38.5%; 3.735e-12)                                                                                                                                                                                                                                                                            | 50 | 9  | 0  | 4.370E-11 | 15.01 | 15.01 |

|    |                                                    |                                                                                                                                                                                                                                                                                                                                                                                                  |    |   |    |           |       |       |
|----|----------------------------------------------------|--------------------------------------------------------------------------------------------------------------------------------------------------------------------------------------------------------------------------------------------------------------------------------------------------------------------------------------------------------------------------------------------------|----|---|----|-----------|-------|-------|
| 25 | Paxillin, PAI1, Actin, PLAU (UPA), Alpha-actinin 1 | cellular component movement (78.7%; 9.012e-33), anatomical structure morphogenesis (85.1%; 1.326e-29), cell projection organization (68.1%; 4.658e-29), locomotion (70.2%; 3.565e-28), coagulation (57.4%; 4.603e-28)                                                                                                                                                                            | 54 | 9 | 10 | 4.230E-10 | 13.19 | 25.69 |
| 26 | CRIP2, eIF6 (ITGB4BP), Beta TnTF, EGFL7, GRAIL     | phosphatidylethanolamine acyl-chain remodeling (27.8%; 5.052e-22), phosphatidylcholine acyl-chain remodeling (27.8%; 1.898e-21), phosphatidylcholine metabolic process (33.3%; 1.940e-20), glycerolipid metabolic process (47.2%; 4.160e-20), ethanolamine-containing compound metabolic process (33.3%; 4.007e-19)                                                                              | 50 | 9 | 0  | 1.470E-09 | 13.27 | 13.27 |
| 27 | BNaC1 (ASIC2), Stomatin, LTBP1, BPAG1, PMEPA1      | signaling (85.1%; 3.614e-14), single organism signaling (85.1%; 3.614e-14), cell surface receptor signaling pathway (70.2%; 4.864e-14), cell communication (85.1%; 9.423e-14), signal transduction (80.9%; 1.520e-13)                                                                                                                                                                            | 50 | 8 | 0  | 7.720E-09 | 11.9  | 11.9  |
| 28 | CCDC95, UBE2F, GALGT, CREB1, MYO1E                 | phospholipase C-activating G-protein coupled receptor signaling pathway (38.0%; 3.200e-31), G-protein coupled receptor signaling pathway (74.0%; 8.579e-29), G-protein coupled receptor signaling pathway, coupled to cyclic nucleotide second messenger (38.0%; 8.528e-25), cell surface receptor signaling pathway (86.0%; 4.039e-24), serotonin receptor signaling pathway (20.0%; 7.107e-22) | 50 | 7 | 0  | 1.770E-07 | 10.34 | 10.34 |

Table S15. Key transcription factors significantly associated with differentially expressed genes between KLF5 and the PLHCX vector control, as defined by MetaCore's interactome analysis for transcription factors. Related biological processes are also shown. The ranking is based on *p* values. Total nodes refer to all nodes in a transcription factor network, while seed nodes refer to the genes differentially expressed between the experimental groups.

| #  | Network   | GO processes                                                                                                                                                                                                                                                                                                                                                                                                                           | Total nodes | Seed nodes | Pathways | <i>p</i> value | zScore | gScore |
|----|-----------|----------------------------------------------------------------------------------------------------------------------------------------------------------------------------------------------------------------------------------------------------------------------------------------------------------------------------------------------------------------------------------------------------------------------------------------|-------------|------------|----------|----------------|--------|--------|
| 1  | CREB1     | negative regulation of cysteine-type endopeptidase activity involved in apoptotic process (28.6%; 5.830e-07), negative regulation of cysteine-type endopeptidase activity (28.6%; 6.825e-07), regulation of hydrolase activity (50.0%; 1.133e-05), negative regulation of endopeptidase activity (28.6%; 1.469e-05), positive regulation of deacetylase activity (14.3%; 2.070e-05)                                                    | 15          | 14         | 0        | 7.410E-45      | 138.35 | 138.35 |
| 2  | HIF1A     | regulation of cysteine-type endopeptidase activity involved in apoptotic process (50.0%; 3.577e-09), regulation of cysteine-type endopeptidase activity (50.0%; 4.824e-09), regulation of endopeptidase activity (50.0%; 5.447e-08), regulation of peptidase activity (50.0%; 1.783e-07), negative regulation of cysteine-type endopeptidase activity involved in apoptotic process (33.3%; 2.905e-07)                                 | 13          | 12         | 0        | 2.650E-38      | 127.38 | 127.38 |
| 3  | GCR-alpha | hormone metabolic process (36.4%; 4.003e-06), regulation of hormone levels (36.4%; 2.022e-05), cellular hormone metabolic process (27.3%; 4.980e-05), regulation of biological quality (72.7%; 1.508e-04), single-multicellular organism process (90.9%; 4.832e-04)                                                                                                                                                                    | 11          | 10         | 0        | 8.180E-32      | 115.39 | 115.39 |
| 4  | c-Myc     | positive regulation of cell proliferation (60.0%; 3.463e-06), regulation of cell proliferation (70.0%; 4.038e-06), regulation of cysteine-type endopeptidase activity involved in apoptotic process (40.0%; 5.167e-06), regulation of cysteine-type endopeptidase activity (40.0%; 6.297e-06), positive regulation of deacetylase activity (20.0%; 1.025e-05)                                                                          | 11          | 10         | 0        | 8.180E-32      | 115.39 | 115.39 |
| 5  | SP1       | negative regulation of cysteine-type endopeptidase activity involved in apoptotic process (44.4%; 7.481e-08), negative regulation of cysteine-type endopeptidase activity (44.4%; 8.766e-08), negative regulation of inclusion body assembly (22.2%; 1.825e-06), negative regulation of endopeptidase activity (44.4%; 1.934e-06), regulation of cysteine-type endopeptidase activity involved in apoptotic process (44.4%; 3.132e-06) | 10          | 9          | 0        | 1.360E-28      | 108.92 | 108.92 |
| 6  | p53       | regulation of cysteine-type endopeptidase activity involved in apoptotic process (50.0%; 7.872e-08), regulation of cysteine-type endopeptidase activity (50.0%; 1.010e-07), negative regulation of cysteine-type endopeptidase activity involved in apoptotic process (40.0%; 1.242e-07), negative regulation of cysteine-type endopeptidase activity (40.0%; 1.455e-07), regulation of endopeptidase activity (50.0%; 7.593e-07)      | 10          | 9          | 0        | 1.360E-28      | 108.92 | 108.92 |
| 7  | Oct-3/4   | response to carbon dioxide (12.5%; 4.029e-04), ectodermal cell fate commitment (12.5%; 4.029e-04), regulation of complement activation, lectin pathway (12.5%; 8.056e-04), ITP metabolic process (12.5%; 8.056e-04), negative regulation of gene silencing by RNA (12.5%; 8.056e-04)                                                                                                                                                   | 8           | 7          | 0        | 3.370E-22      | 94.71  | 94.71  |
| 8  | STAT3     | regulation of endopeptidase activity (75.0%; 1.768e-09), regulation of peptidase activity (75.0%; 5.880e-09), response to ethanol (62.5%; 1.650e-08), regulation of cysteine-type endopeptidase activity involved in apoptotic process (62.5%; 1.787e-08), regulation of cysteine-type endopeptidase activity (62.5%; 2.294e-08)                                                                                                       | 8           | 7          | 0        | 3.370E-22      | 94.71  | 94.71  |
| 9  | C/EBPbeta | neutrophil aggregation (33.3%; 2.282e-07), sequestering of zinc ion (33.3%; 1.141e-06), granulocyte chemotaxis (50.0%; 1.156e-06), regulation of endopeptidase activity (66.7%; 2.380e-06), chemokine production (33.3%; 2.736e-06)                                                                                                                                                                                                    | 7           | 6          | 0        | 4.990E-19      | 86.78  | 86.78  |
| 10 | c-Jun     | negative regulation of neuron death (57.1%; 7.439e-07), regulation of neuron death (57.1%; 2.371e-06), negative regulation of cell death (71.4%; 9.622e-06), positive regulation of cellular metabolic process (85.7%; 3.289e-05), negative regulation of neuron apoptotic process (42.9%; 4.301e-05)                                                                                                                                  | 7           | 6          | 0        | 4.990E-19      | 86.78  | 86.78  |

|    |                          |                                                                                                                                                                                                                                                                                                                                                                                                                                   |   |   |   |           |       |       |
|----|--------------------------|-----------------------------------------------------------------------------------------------------------------------------------------------------------------------------------------------------------------------------------------------------------------------------------------------------------------------------------------------------------------------------------------------------------------------------------|---|---|---|-----------|-------|-------|
| 11 | E2F1                     | negative regulation of cysteine-type endopeptidase activity involved in apoptotic process (50.0%; 2.451e-06), negative regulation of cysteine-type endopeptidase activity (50.0%; 2.759e-06), cellular response to hypoxia (50.0%; 8.647e-06), cellular response to decreased oxygen levels (50.0%; 8.647e-06), cellular response to oxygen levels (50.0%; 1.047e-05)                                                             | 7 | 6 | 0 | 4.990E-19 | 86.78 | 86.78 |
| 12 | SMAD3                    | regulation of cysteine-type endopeptidase activity involved in apoptotic process (80.0%; 1.294e-07), regulation of cysteine-type endopeptidase activity (80.0%; 1.581e-07), regulation of endopeptidase activity (80.0%; 8.062e-07), negative regulation of cysteine-type endopeptidase activity involved in apoptotic process (60.0%; 1.230e-06), negative regulation of cysteine-type endopeptidase activity (60.0%; 1.385e-06) | 7 | 6 | 0 | 4.990E-19 | 86.78 | 86.78 |
| 13 | RelA (p65 NF-kB subunit) | regulation of cysteine-type endopeptidase activity involved in apoptotic process (66.7%; 3.843e-07), regulation of cysteine-type endopeptidase activity (66.7%; 4.693e-07), regulation of endopeptidase activity (66.7%; 2.380e-06), negative regulation of cysteine-type endopeptidase activity involved in apoptotic process (50.0%; 2.451e-06), negative regulation of cysteine-type endopeptidase activity (50.0%; 2.759e-06) | 6 | 5 | 0 | 7.050E-16 | 78.11 | 78.11 |
| 14 | EGR1                     | rhythmic process (66.7%; 1.481e-06), positive regulation of receptor internalization (33.3%; 1.298e-05), ovulation cycle (50.0%; 1.365e-05), positive regulation of nucleobase-containing compound metabolic process (83.3%; 2.266e-05), regulation of receptor internalization (33.3%; 2.275e-05)                                                                                                                                | 6 | 5 | 0 | 7.050E-16 | 78.11 | 78.11 |
| 15 | NANOG                    | gonad development (60.0%; 3.789e-05), development of primary sexual characteristics (60.0%; 4.979e-05), sex differentiation (60.0%; 7.300e-05), reproductive structure development (60.0%; 8.049e-05), reproductive system development (60.0%; 8.349e-05)                                                                                                                                                                         | 5 | 4 | 0 | 9.450E-13 | 68.45 | 68.45 |
| 16 | AP-1                     | positive regulation of smooth muscle cell proliferation (60.0%; 1.268e-06), regulation of smooth muscle cell proliferation (60.0%; 4.885e-06), negative regulation of neuron death (60.0%; 1.777e-05), monocyte differentiation (40.0%; 2.836e-05), positive regulation of cell proliferation (80.0%; 3.517e-05)                                                                                                                  | 5 | 4 | 0 | 9.450E-13 | 68.45 | 68.45 |
| 17 | Androgen receptor        | mammary gland lobule development (50.0%; 1.233e-05), mammary gland alveolus development (50.0%; 1.233e-05), regulation of morphogenesis of a branching structure (50.0%; 1.055e-04), basophil chemotaxis (25.0%; 2.014e-04), activation of prostate induction by androgen receptor signaling pathway (25.0%; 2.014e-04)                                                                                                           | 5 | 4 | 0 | 9.450E-13 | 68.45 | 68.45 |
| 18 | ESR1 (nuclear)           | positive regulation of cell proliferation (100.0%; 3.811e-07), regulation of cell proliferation (100.0%; 5.471e-06), hormone metabolic process (60.0%; 1.198e-05), regulation of hormone levels (60.0%; 4.085e-05), cellular response to endogenous stimulus (80.0%; 7.805e-05)                                                                                                                                                   | 5 | 4 | 0 | 9.450E-13 | 68.45 | 68.45 |
| 19 | c-Fos                    | response to cold (40.0%; 1.048e-04), negative regulation of cysteine-type endopeptidase activity involved in apoptotic process (40.0%; 2.486e-04), basophil chemotaxis (20.0%; 2.518e-04), cellular response to UV-C (20.0%; 2.518e-04), cellular response to vitamin B1 (20.0%; 2.518e-04)                                                                                                                                       | 5 | 4 | 0 | 9.450E-13 | 68.45 | 68.45 |
| 20 | PPAR-gamma               | regulation of cysteine-type endopeptidase activity involved in apoptotic process (80.0%; 1.294e-07), regulation of cysteine-type endopeptidase activity (80.0%; 1.581e-07), regulation of endopeptidase activity (80.0%; 8.062e-07), negative regulation of cysteine-type endopeptidase activity involved in apoptotic process (60.0%; 1.230e-06), negative regulation of cysteine-type endopeptidase activity (60.0%; 1.385e-06) | 5 | 4 | 0 | 9.450E-13 | 68.45 | 68.45 |
| 21 | p63                      | negative regulation of inclusion body assembly (40.0%; 5.070e-07), negative regulation of cysteine-type endopeptidase activity involved in apoptotic process (60.0%; 1.230e-06), negative regulation of cysteine-type endopeptidase activity (60.0%; 1.385e-06), regulation of inclusion body assembly (40.0%; 2.787e-06), response to radiation (80.0%; 4.590e-06)                                                               | 5 | 4 | 0 | 9.450E-13 | 68.45 | 68.45 |

Table S16. Key transcription factors significantly associated with differentially expressed genes between K369R and the PLHCX vector control, as defined by MetaCore's interactome analysis for transcription factors. Related biological processes are also shown. The ranking is based on  $p$  values. Total nodes refer to all nodes in a transcription factor network, while seed nodes refer to the genes differentially expressed between the experimental groups.

| #  | Network                  | GO processes                                                                                                                                                                                                                                                                                    | Total nodes | Seed nodes | Pathways | $p$ value  | zScore | gScore |
|----|--------------------------|-------------------------------------------------------------------------------------------------------------------------------------------------------------------------------------------------------------------------------------------------------------------------------------------------|-------------|------------|----------|------------|--------|--------|
| 1  | CREB1                    | biological regulation (83.3%; 1.851e-10), negative regulation of cellular process (40.0%; 5.215e-10), regulation of cellular component organization (25.0%; 1.295e-09), negative regulation of biological process (41.1%; 5.112e-09), regulation of cellular process (76.1%; 5.181e-09)         | 188         | 187        | 0        | 0.000E+00  | 151.16 | 151.16 |
| 2  | c-Myc                    | response to organic cyclic compound (30.1%; 8.398e-17), response to organic substance (44.4%; 4.011e-14), response to endogenous stimulus (33.8%; 4.702e-14), positive regulation of biological process (54.1%; 1.366e-13), organ development (43.6%; 4.736e-13)                                | 137         | 136        | 0        | 3.400E-291 | 128.73 | 128.73 |
| 3  | GCR-alpha                | response to endogenous stimulus (36.8%; 5.969e-15), negative regulation of biological process (53.0%; 1.864e-13), response to organic cyclic compound (28.2%; 3.177e-13), response to lipid (27.4%; 8.745e-13), response to oxidative stress (17.1%; 2.303e-12)                                 | 118         | 117        | 0        | 2.600E-249 | 119.31 | 119.31 |
| 4  | SP1                      | response to endogenous stimulus (44.0%; 1.554e-21), response to organic substance (50.9%; 1.447e-17), developmental process (68.1%; 2.015e-17), response to hormone stimulus (32.8%; 8.076e-17), single-multicellular organism process (75.9%; 1.654e-16)                                       | 117         | 116        | 0        | 4.060E-247 | 118.79 | 118.79 |
| 5  | Androgen receptor        | tissue development (31.7%; 1.866e-10), negative regulation of cellular process (47.1%; 4.310e-10), negative regulation of biological process (49.0%; 9.632e-10), developmental process (58.7%; 1.029e-09), positive regulation of cellular metabolic process (36.5%; 1.470e-09)                 | 108         | 107        | 0        | 2.010E-227 | 114.04 | 114.04 |
| 6  | ESR1 (nuclear)           | positive regulation of biological process (55.7%; 4.506e-12), negative regulation of biological process (51.9%; 1.277e-11), regulation of cell death (32.1%; 1.744e-11), developmental process (61.3%; 1.937e-11), response to organic cyclic compound (27.4%; 1.970e-11)                       | 108         | 107        | 0        | 2.010E-227 | 114.04 | 114.04 |
| 7  | p53                      | positive regulation of cellular process (64.0%; 6.160e-20), positive regulation of biological process (65.0%; 7.615e-18), developmental process (70.0%; 1.382e-16), regulation of cell death (36.0%; 8.506e-14), regulation of programmed cell death (35.0%; 1.388e-13)                         | 101         | 100        | 0        | 3.650E-212 | 110.21 | 110.21 |
| 8  | RelA (p65 NF-kB subunit) | response to endogenous stimulus (42.4%; 3.886e-16), response to organic cyclic compound (33.7%; 7.338e-15), response to oxygen-containing compound (40.2%; 1.175e-14), positive regulation of biological process (60.9%; 9.260e-14), positive regulation of cellular process (56.5%; 2.673e-13) | 93          | 92         | 0        | 8.710E-195 | 105.66 | 105.66 |
| 9  | Oct-3/4                  | cell differentiation (51.1%; 1.839e-12), response to organic substance (48.9%; 2.016e-12), developmental process (65.9%; 3.077e-12), negative regulation of biological process (55.7%; 5.585e-12), regulation of gene expression (56.8%; 5.765e-12)                                             | 91          | 90         | 0        | 1.880E-190 | 104.49 | 104.49 |
| 10 | c-Jun                    | response to endogenous stimulus (46.9%; 1.391e-17), response to inorganic substance (29.6%; 7.218e-16), response to organic cyclic compound (37.0%; 1.030e-15), response to organic substance (55.6%; 1.300e-15), positive regulation of cellular process (61.7%; 5.953e-15)                    | 81          | 81         | 0        | 6.540E-173 | 99.68  | 99.68  |
| 11 | HIF1A                    | response to organic cyclic compound (36.2%; 5.993e-15), developmental process (71.2%; 2.653e-14), single-organism developmental process (62.5%; 5.451e-14), system development (62.5%; 8.317e-14), response to endogenous stimulus (41.2%; 1.839e-13)                                           | 83          | 82         | 0        | 3.710E-173 | 99.67  | 99.67  |



|    |              |                                                                                                                                                                                                                                                                                                                                           |    |    |   |            |       |       |
|----|--------------|-------------------------------------------------------------------------------------------------------------------------------------------------------------------------------------------------------------------------------------------------------------------------------------------------------------------------------------------|----|----|---|------------|-------|-------|
| 12 | NANOG        | regulation of transcription from RNA polymerase II promoter (38.0%; 1.601e-12), regulation of gene expression (58.2%; 1.246e-11), organ development (49.4%; 3.059e-11), developmental process (65.8%; 4.383e-11), single-organism developmental process (57.0%; 9.070e-11)                                                                | 79 | 78 | 0 | 1.560E-164 | 97.18 | 97.18 |
| 13 | STAT3        | response to inorganic substance (32.4%; 6.990e-17), response to endogenous stimulus (45.9%; 1.552e-15), developmental process (73.0%; 2.467e-14), response to organic substance (55.4%; 2.699e-14), response to external stimulus (41.9%; 3.469e-14)                                                                                      | 76 | 75 | 0 | 4.460E-158 | 95.27 | 95.27 |
| 14 | SP3          | response to endogenous stimulus (43.1%; 2.449e-13), organ development (54.2%; 6.839e-13), developmental process (70.8%; 8.809e-13), response to hormone stimulus (34.7%; 3.490e-12), regulation of transcription from RNA polymerase II promoter (38.9%; 4.467e-12)                                                                       | 72 | 71 | 0 | 1.750E-149 | 92.65 | 92.65 |
| 15 | C/EBPbeta    | response to endogenous stimulus (48.6%; 1.836e-16), response to oxygen-containing compound (44.3%; 7.070e-14), response to organic cyclic compound (37.1%; 7.738e-14), response to organic substance (55.7%; 8.983e-14), tissue development (42.9%; 1.721e-13)                                                                            | 71 | 70 | 0 | 2.460E-147 | 91.99 | 91.99 |
| 16 | E2F1         | regulation of transcription from RNA polymerase II promoter (42.6%; 1.099e-13), cellular response to stress (38.2%; 3.150e-12), positive regulation of cellular metabolic process (47.1%; 1.229e-11), positive regulation of macromolecule metabolic process (45.6%; 4.749e-11), single-organism developmental process (60.3%; 5.247e-11) | 71 | 70 | 0 | 2.460E-147 | 91.99 | 91.99 |
| 17 | p63          | regulation of transcription from RNA polymerase II promoter (39.7%; 6.014e-12), positive regulation of cellular process (55.9%; 6.661e-10), developmental process (66.2%; 6.808e-10), negative regulation of biological process (55.9%; 1.149e-09), positive regulation of biological process (58.8%; 1.338e-09)                          | 69 | 68 | 0 | 4.780E-143 | 90.64 | 90.64 |
| 18 | EGR1         | regulation of transcription from RNA polymerase II promoter (47.1%; 1.744e-16), positive regulation of cellular process (67.6%; 4.108e-16), positive regulation of biological process (70.6%; 1.068e-15), developmental process (76.5%; 2.771e-15), single-organism developmental process (66.2%; 4.650e-14)                              | 68 | 67 | 0 | 6.650E-141 | 89.96 | 89.96 |
| 19 | NF-kB1 (p50) | response to endogenous stimulus (42.4%; 5.430e-12), regulation of gene expression (62.1%; 8.760e-12), response to organic cyclic compound (34.8%; 9.906e-12), response to inorganic substance (27.3%; 1.461e-11), regulation of transcription from RNA polymerase II promoter (39.4%; 1.830e-11)                                          | 67 | 66 | 0 | 9.220E-139 | 89.28 | 89.28 |
| 20 | YY1          | regulation of transcription from RNA polymerase II promoter (40.3%; 2.433e-11), circulatory system development (29.0%; 1.067e-09), cardiovascular system development (29.0%; 1.067e-09), organ development (50.0%; 2.143e-09), regulation of gene expression (58.1%; 2.332e-09)                                                           | 65 | 64 | 0 | 1.760E-134 | 87.89 | 87.89 |
| 21 | NF-kB        | regulation of transcription from RNA polymerase II promoter (42.9%; 6.706e-13), negative regulation of biological process (61.9%; 9.080e-12), response to endogenous stimulus (42.9%; 9.714e-12), developmental process (71.4%; 1.217e-11), response to organic cyclic compound (34.9%; 2.663e-11)                                        | 63 | 62 | 0 | 3.340E-130 | 86.49 | 86.49 |

Table S17. Key transcription factors significantly associated with differentially expressed genes between K369R and KLF5, as defined by MetaCore's interactome analysis for transcription factors. Related biological processes are also shown. The ranking is based on *p* values. Total nodes refer to all nodes in a transcription factor network, while seed nodes refer to the genes differentially expressed between the experimental groups.

| #  | Network                  | GO processes                                                                                                                                                                                                                                                                                              | Total nodes | Seed nodes | Pathways | <i>p</i> value | zScore | gScore |
|----|--------------------------|-----------------------------------------------------------------------------------------------------------------------------------------------------------------------------------------------------------------------------------------------------------------------------------------------------------|-------------|------------|----------|----------------|--------|--------|
| 1  | CREB1                    | biological regulation (84.4%; 9.568e-11), blood vessel development (13.2%; 9.668e-09), negative regulation of cellular process (38.9%; 1.276e-08), blood vessel morphogenesis (12.0%; 1.567e-08), response to external stimulus (23.4%; 1.789e-08)                                                        | 175         | 174        | 0        | 0.000E+00      | 150.68 | 150.68 |
| 2  | c-Myc                    | response to organic cyclic compound (29.4%; 1.509e-14), response to inorganic substance (21.0%; 1.019e-12), response to organic substance (43.7%; 2.627e-12), regeneration (13.4%; 4.790e-12), regulation of cell death (31.1%; 6.458e-12)                                                                | 124         | 123        | 0        | 1.670E-266     | 126.49 | 126.49 |
| 3  | SP1                      | developmental process (71.8%; 1.256e-19), single-multicellular organism process (80.0%; 3.537e-19), multicellular organismal process (80.9%; 9.725e-19), multicellular organismal development (66.4%; 7.402e-18), single-organism developmental process (60.9%; 2.036e-17)                                | 113         | 112        | 0        | 5.880E-242     | 120.64 | 120.64 |
| 4  | GCR-alpha                | anatomical structure development (59.1%; 6.634e-13), tissue development (33.6%; 2.075e-12), system development (53.6%; 5.817e-12), negative regulation of biological process (51.8%; 5.841e-12), vasculature development (20.0%; 7.462e-12)                                                               | 111         | 110        | 0        | 1.650E-237     | 119.55 | 119.55 |
| 5  | ESR1 (nuclear)           | regulation of cell death (35.9%; 4.168e-14), regulation of programmed cell death (34.0%; 3.794e-13), regulation of apoptotic process (33.0%; 1.643e-12), developmental process (61.2%; 4.603e-11), response to endogenous stimulus (33.0%; 1.237e-10)                                                     | 103         | 102        | 0        | 9.230E-220     | 115.07 | 115.07 |
| 6  | Androgen receptor        | tissue development (34.0%; 2.254e-11), positive regulation of cellular metabolic process (40.2%; 3.128e-11), positive regulation of metabolic process (41.2%; 4.795e-11), regulation of multicellular organismal process (41.2%; 5.014e-11), positive regulation of biological process (54.6%; 1.390e-10) | 102         | 101        | 0        | 1.510E-217     | 114.5  | 114.5  |
| 7  | p53                      | regulation of programmed cell death (42.2%; 7.964e-18), positive regulation of cellular process (63.3%; 1.347e-17), positive regulation of biological process (66.7%; 2.243e-17), regulation of cell death (42.2%; 3.391e-17), regulation of apoptotic process (41.1%; 4.684e-17)                         | 90          | 89         | 0        | 4.490E-191     | 107.4  | 107.4  |
| 8  | RelA (p65 NF-kB subunit) | regulation of cell death (39.8%; 5.492e-15), regulation of programmed cell death (38.6%; 1.048e-14), positive regulation of cellular process (59.1%; 2.231e-14), positive regulation of biological process (62.5%; 3.092e-14), regulation of apoptotic process (37.5%; 5.511e-14)                         | 88          | 87         | 0        | 1.120E-186     | 106.17 | 106.17 |
| 9  | Oct-3/4                  | regulation of signal transduction (47.1%; 5.460e-14), anatomical structure development (64.7%; 1.941e-13), single-organism developmental process (60.0%; 3.131e-13), developmental process (68.2%; 3.196e-13), tissue development (38.8%; 3.206e-13)                                                      | 88          | 87         | 0        | 1.120E-186     | 106.17 | 106.17 |
| 10 | HIF1A                    | response to endogenous stimulus (45.0%; 5.226e-16), response to organic cyclic compound (37.5%; 6.909e-16), response to external stimulus (42.5%; 1.185e-15), system development (65.0%; 2.433e-15), response to lipid (36.2%; 2.940e-15)                                                                 | 82          | 81         | 0        | 1.630E-173     | 102.4  | 102.4  |
| 11 | STAT3                    | response to external stimulus (45.7%; 6.203e-16), developmental process (74.3%; 2.198e-14), single-organism developmental process (65.7%; 3.612e-14), anatomical structure development (70.0%; 3.953e-14), positive regulation of biological process (67.1%; 4.313e-14)                                   | 71          | 70         | 0        | 1.750E-149     | 95.09  | 95.09  |
| 12 | c-Jun                    | positive regulation of cellular process (66.7%; 9.752e-16), response to inorganic substance (31.9%; 2.074e-15), response to endogenous stimulus (46.4%; 7.554e-15), positive regulation of biological process (68.1%; 1.855e-14), positive regulation of gene expression (40.6%; 4.214e-14)               | 69          | 69         | 0        | 3.800E-149     | 95.09  | 95.09  |

|    |              |                                                                                                                                                                                                                                                                                                           |    |    |   |            |       |       |
|----|--------------|-----------------------------------------------------------------------------------------------------------------------------------------------------------------------------------------------------------------------------------------------------------------------------------------------------------|----|----|---|------------|-------|-------|
| 13 | p63          | positive regulation of cellular process (62.1%; 1.211e-12), positive regulation of biological process (65.2%; 2.492e-12), regulation of cell death (40.9%; 3.151e-12), system development (63.6%; 3.361e-12), regulation of apoptotic process (39.4%; 6.857e-12)                                          | 66 | 65 | 0 | 1.330E-138 | 91.58 | 91.58 |
| 14 | NANOG        | circulatory system development (33.8%; 4.595e-13), cardiovascular system development (33.8%; 4.595e-13), blood vessel development (27.7%; 6.179e-13), vasculature development (27.7%; 1.702e-12), blood vessel morphogenesis (24.6%; 7.501e-12)                                                           | 66 | 65 | 0 | 1.330E-138 | 91.58 | 91.58 |
| 15 | E2F1         | cellular response to extracellular stimulus (17.7%; 1.144e-10), blood vessel development (24.2%; 4.319e-10), positive regulation of gene expression (35.5%; 4.908e-10), positive regulation of metabolic process (46.8%; 6.043e-10), positive regulation of cellular metabolic process (45.2%; 7.719e-10) | 63 | 62 | 0 | 4.350E-132 | 89.4  | 89.4  |
| 16 | C/EBPbeta    | response to endogenous stimulus (50.8%; 7.641e-16), response to external stimulus (45.9%; 3.586e-14), tissue development (45.9%; 1.340e-13), response to lipid (37.7%; 8.285e-13), organ development (57.4%; 1.067e-12)                                                                                   | 61 | 60 | 0 | 9.460E-128 | 87.92 | 87.92 |
| 17 | KLF4         | anatomical structure development (76.7%; 7.857e-16), tissue development (48.3%; 8.940e-15), developmental process (78.3%; 1.188e-14), system development (70.0%; 2.312e-14), organ development (60.0%; 7.546e-14)                                                                                         | 60 | 59 | 0 | 1.390E-125 | 87.18 | 87.18 |
| 18 | SP3          | tissue development (46.6%; 2.388e-13), response to external stimulus (43.1%; 4.812e-12), regeneration (20.7%; 1.231e-11), blood vessel development (27.6%; 1.281e-11), anatomical structure development (69.0%; 1.844e-11)                                                                                | 58 | 57 | 0 | 2.980E-121 | 85.66 | 85.66 |
| 19 | YY1          | circulatory system development (40.0%; 8.031e-15), cardiovascular system development (40.0%; 8.031e-15), tissue development (49.1%; 4.607e-14), blood vessel development (30.9%; 3.668e-13), vasculature development (30.9%; 9.659e-13)                                                                   | 58 | 57 | 0 | 2.980E-121 | 85.66 | 85.66 |
| 20 | STAT1        | regulation of cell death (47.4%; 4.005e-14), positive regulation of cellular process (68.4%; 4.031e-14), positive regulation of biological process (71.9%; 4.667e-14), regulation of programmed cell death (45.6%; 1.325e-13), regulation of apoptotic process (43.9%; 9.634e-13)                         | 57 | 56 | 0 | 4.350E-119 | 84.89 | 84.89 |
| 21 | NF-kB1 (p50) | response to external stimulus (50.0%; 2.228e-15), regulation of cell death (50.0%; 2.294e-15), response to oxidative stress (30.4%; 4.240e-15), regulation of apoptotic process (48.2%; 6.424e-15), regulation of programmed cell death (48.2%; 7.989e-15)                                                | 57 | 56 | 0 | 4.350E-119 | 84.89 | 84.89 |
